# Supplementary material for: Oxa/thiazole-tetrahydropyran triazole-linked hybrids with selective antiproliferative activity against human tumour cells
Source: Royal Society of Chemistry journal article supplement (doi:10.1039/c8nj02388c), 2018-01-01

## Electronic Supplementary Information

### Oxa/thiazole-tetrahydropyran triazole-linked hybrids with selective antiproliferative activity against human tumour cells

Guillermo Valdomir,<sup>a</sup> María de los Ángeles Fernández,<sup>a</sup> Irene Lagunes,<sup>b</sup> Juan I. Padrón,<sup>b,c</sup> Víctor S. Martín,<sup>b</sup> José M. Padrón,<sup>\*b</sup> and Danilo Davyt<sup>\*a</sup>

- a) Departamento de Química Orgánica, Facultad de Química, UdelaR, Av General Flores 2124, 11800 Montevideo, Uruguay. E-mail: [ddavyt@fq.edu.uy](mailto:ddavyt@fq.edu.uy)
- b) Instituto Universitario de Bio-Organica "Antonio González" (IUBO-AG), Centro de Investigaciones Biomédicas de Canarias (CIBICAN), Universidad de La Laguna, C/ Astrofísico Francisco Sánchez 2, 38206 La Laguna, Spain. E-mail: [jmpadron@ull.es](mailto:jmpadron@ull.es)
- c) Instituto de Productos Naturales y Agrobiología, CSIC, C/ Astrofísico Francisco Sánchez 3, 38206 La Laguna, Spain.

#### Contents

|    |                                                                           |     |
|----|---------------------------------------------------------------------------|-----|
| 1. | General methods (Chemistry).....                                          | S2  |
| 2. | Synthetic procedures.....                                                 | S3  |
| 3. | NMR analysis for cis-18a and trans-18a (trifluoroacetic ester of 8a)..... | S47 |
| 4. | General methods (Biological assays).....                                  | S48 |
| 5. | Antiproliferative activity for <b>12a</b> and <b>13</b> .....             | S49 |
| 6. | References.....                                                           | S50 |
| 7. | NMR spectra..                                                             | S51 |

## 1. General Methods (Chemistry)

**Experimental Methods:** Air and water sensitive reactions were performed under a nitrogen atmosphere in flame-dried glassware. All other reactions were carried out in pre-dried round bottom flasks. All solvents were distilled prior to use. All anhydrous solvents were dried and purified by standard methods.<sup>1</sup> All commercially available reagents were used without further purification. All reactions were magnetically stirred and monitored by thin layer chromatography (TLC). Cooling was performed by using the JULABO FT902 immersion coolers.

**Chromatography:** Thin-layer chromatography was performed on silica gel plates (TLC Silica gel 60 F<sub>254</sub>) from Macherey-Nagel or Merck. Column chromatography was performed with silica gel (Geduran<sup>®</sup> Si60, 230-400 mesh) from Merck.

**NMR spectroscopy:** NMR spectra were recorded on Bruker Avance 400. Chemical shifts are given in ppm relative to tetramethylsilane (TMS) or residual solvent signal and coupling constants *J* in Hertz. Multiplicities of first order signals are assigned as: s (singlet), br s (broad singlet), d (doublet), t (triplet), q (quartet), dd (doublet of doublets) etc. Signals of higher order are declared as m (multiplet) or m<sub>c</sub> (centered multiplet).

**IR spectroscopy:** IR spectra were recorded with a FT-IR 8101A spectrophotometer from Shimadzu using NaCl optics.

**Mass spectrometry:** Electrospray ESI high-resolution mass spectra (HRMS) spectra were recorded on a MicroTOF-Q spectrometer from Bruker Daltronics.

**Abbreviations:** aq. (aqueous), sat. (saturated solution), eq. (equivalents), THF (tetrahydrofuran), PE (petroleum ether), DABCO (1,4-diazabicyclooctane), TFA (trifluoroacetic acid), TBS (*tert*-butyldimethylsilyl), TBSOTf (*tert*-butyldimethylsilyl trifluoromethanesulfonate), DMSO (dimethyl sulfoxide), Py (pyridine), DAIB ((diacetoxyiodo)benzene), TEMPO (2,2,6,6-tetramethylpiperidiny1 1-oxyl), quant. (quantitative), 4-DMAP (4-(dimethylamino)pyridine).

## 2. Synthetic Procedures

### 2.1 Hept-1-en-4-ol (**7a**).

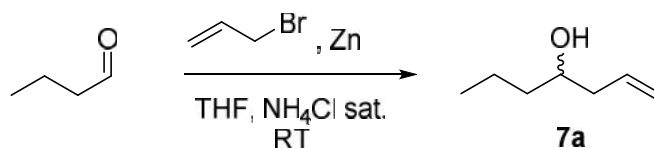

Zn (3.14 g, 48.0 mmol, 1.20 eq.) was added to  $\text{NH}_4\text{Cl}$  sat. (40 mL) and a solution of butyraldehyde (2.82 g, 3.53 mL, 40.0 mmol, 1.00 eq.) in THF (4 mL) was added. Allyl bromide (5.81 g, 4.15 mL, 48.0 mmol, 1.20 eq.) was added dropwise and the reaction was stirred overnight at room temperature. After completion by TLC,  $\text{Et}_2\text{O}$  (40 mL) was added and the solids were filtered. The phases were separated and the aqueous phase was further extracted with  $\text{Et}_2\text{O}$  ( $2 \times 40$  mL). The combined organic phases were dried over anhydrous  $\text{Na}_2\text{SO}_4$ , and concentrated under reduced pressure at low temperature. The crude reaction mixture was purified by column chromatography ( $\text{SiO}_2$ ,  $\text{EtOAc}:\text{PE}$  20:80) to obtain compounds **7a** (3.04 g, 26.62 mmol, 67 %) as a solution 76 % in  $\text{EtOAc}$ .

**TLC:**  $R_f$  = 0.45 ( $\text{EtOAc}:\text{PE}$  = 20:80).

**$^1\text{H}$  NMR** (400 MHz,  $\text{CDCl}_3$ )  $\delta$  5.84 ( $m_c$ , 1 H), 5.17-5.12 (m, 2 H), 3.67 ( $m_c$ , 1 H), 2.31 ( $m_c$ , 1 H), 2.14 ( $m_c$ , 1 H), 1.60-1.59 (m, 1 H), 1.51-1.38 (m, 3 H), 0.94 (t, 3 H,  $J$  = 7.0 Hz) ppm.

**$^{13}\text{C}$  NMR** (100 MHz,  $\text{CDCl}_3$ )  $\delta$  135.0, 118.2, 70.5, 42.1, 39.1, 19.0, 14.2 ppm.

Data was comparable to that available in the literature.<sup>2</sup>

### 2.2 *rel*-Methyl 2-([2*S*,4*R*,6*S*]-4-hydroxy-6-propyltetrahydro-2*H*-pyran-2-yl)acetate (**8a**).

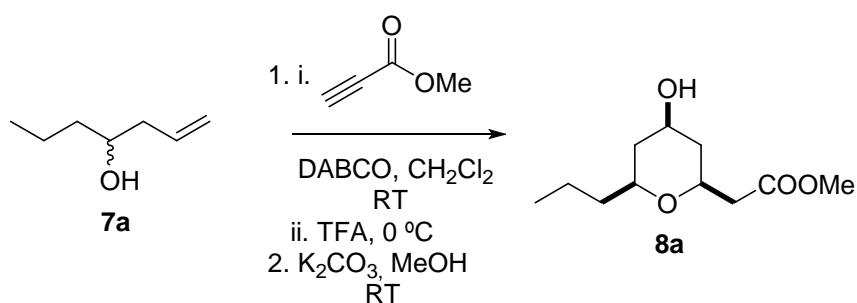

Alcohols **7a** (1.00 g, 8.76 mmol, 1.00 eq.) was dissolved in  $\text{CH}_2\text{Cl}_2$  (12 mL) under  $\text{N}_2$  atmosphere, and DABCO (49.1 mg, 0.44 mmol, 0.05 eq.) was added. Methyl propiolate

(0.82 g, 0.86 mL, 9.61 mmol, 1.10 eq.) was added dropwise as a solution in CH<sub>2</sub>Cl<sub>2</sub> (12 mL) and the solution was stirred at RT for 1 hour. After completion by TLC, the solution was cooled down to 0 °C, and TFA (9.69 g, 6.50 mL, 87.57 mmol, 10.00 eq.) was added dropwise. After completion by TLC, NaHCO<sub>3</sub> sat. (50 mL) was added. The phases were separated and the aqueous phase was extracted with CH<sub>2</sub>Cl<sub>2</sub> (3 × 50 mL). The combined organic phases were dried over anhydrous Na<sub>2</sub>SO<sub>4</sub>, and concentrated under reduced pressure. Under N<sub>2</sub> atmosphere, the crude reaction was dissolved in dry MeOH (12 mL) and dry K<sub>2</sub>CO<sub>3</sub> (2.42 g, 17.52 mmol, 2.00 eq.) was added at RT. After completion by TLC, H<sub>2</sub>O (40 mL) was added and the aqueous phase was extracted with CH<sub>2</sub>Cl<sub>2</sub> (3 × 40 mL). The combined organic phases were dried over anhydrous Na<sub>2</sub>SO<sub>4</sub>, and concentrated under reduced pressure. The crude reaction mixture was purified by column chromatography (SiO<sub>2</sub>, EtOAc:PE 60:40) to obtain compounds **8a** (racemate) (1.11 g, 5.11 mmol, 58 %, three steps) as a colorless oil.

**TLC:** *R<sub>f</sub>* = 0.36 (EtOAc:PE = 50:50).

**<sup>1</sup>H NMR** (400 MHz, CDCl<sub>3</sub>) δ 3.82 (dddd, 1 H, *J* = 11.1, 11.1, 4.7, 4.7 Hz), 3.75 (dddd, 1 H, *J* = 11.3, 7.9, 5.5, 1.9 Hz), 3.69 (s, 3 H), 3.32 (dddd, 1 H, *J* = 12.0, 7.7, 4.2, 1.9 Hz), 2.60 (dd, 1 H, *J* = 15.1, 7.9 Hz), 2.47 (dd, 1 H, *J* = 15.1, 5.5 Hz), 2.00 (dddd, 1 H, *J* = 12.2, 4.7, 1.9, 1.9 Hz), 1.93 (dddd, 1 H, *J* = 12.2, 4.7, 1.9, 1.9 Hz), 1.56-1.30 (m, 4 H), 1.23-1.10 (m, 2 H), 0.89 (t, 3 H, *J* = 7.0 Hz) ppm.

**<sup>13</sup>C NMR** (100 MHz, CDCl<sub>3</sub>) δ 171.8, 75.6, 72.2, 68.1, 51.8, 41.1, 41.0, 40.9, 38.1, 18.9, 14.1 ppm.

**IR** (NaCl, film):  $\tilde{\nu}$  (cm<sup>-1</sup>) = 3425, 2951, 2939, 2870, 1743, 1724, 1438, 1373, 1327, 1269, 1249, 1195, 1141, 1080, 1041, 999, 972, 817, 748.

**HRMS** (ESI+) **C<sub>11</sub>H<sub>20</sub>O<sub>4</sub>** (216.28): *m/z* [M+Na]<sup>+</sup> calcd. for C<sub>11</sub>H<sub>20</sub>O<sub>4</sub>Na: 239.12538; found: 239.12834.

### 2.3 *rel*-Methyl 2-([2*S*,4*R*,6*S*]-4-[(*tert*-butyldimethylsilyl)oxy]-6-propyltetrahydro-2*H*-pyran-2-yl)acetate (**9a**).

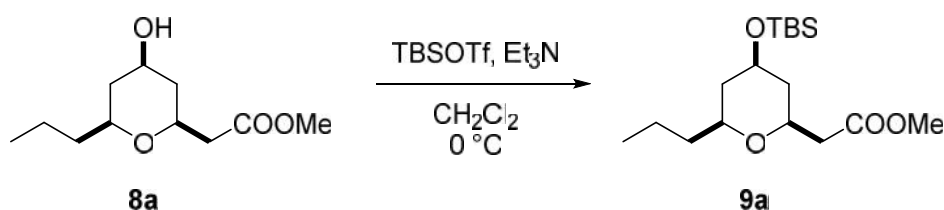

Alcohols **8a** (500.0 mg, 2.31 mmol, 1.00 eq.) was dissolved in CH<sub>2</sub>Cl<sub>2</sub> (10 mL) under N<sub>2</sub> atmosphere and Et<sub>3</sub>N (467.5 mg, 0.64 mL, 4.62 mmol, 2.00 eq.) was added. The solution was cooled down to 0 °C and TBSOTf (914.6 mg, 0.80 mL, 3.46 mmol, 1.50 eq.) was added dropwise. After 10 minutes at this temperature, the solution was stirred at RT for 1 hour. After completion by TLC, brine (20 mL) was added and the aqueous phase was extracted with CH<sub>2</sub>Cl<sub>2</sub> (3 × 20 mL). The combined organic phases were dried over anhydrous Na<sub>2</sub>SO<sub>4</sub>, and concentrated under reduced pressure. The crude reaction mixture was purified by column chromatography (SiO<sub>2</sub>, EtOAc:PE 10:90) to obtain compounds **9a** (racemate) (695.7 mg, 2.10 mmol, 91 %) as a colorless oil.

**TLC:** *R*<sub>f</sub> = 0.84 (EtOAc:PE = 30:70).

**<sup>1</sup>H NMR** (400 MHz, CDCl<sub>3</sub>) δ 3.82-3.70 (m, 2 H), 3.69 (s, 3 H), 3.28 (dddd, 1 H, *J* = 11.8, 7.7, 4.1, 1.9 Hz), 2.58 (dd, 1 H, *J* = 15.1, 8.2 Hz), 2.41 (dd, 1 H, *J* = 15.1, 5.1 Hz), 1.85 (dddd, 1 H, *J* = 11.6, 4.3, 1.8, 1.8 Hz), 1.78 (dddd, 1 H, *J* = 12.6, 4.4, 1.9, 1.8 Hz), 1.56-1.29 (m, 4 H), 1.27-1.14 (m, 2 H), 0.89 (t, 3 H, *J* = 7.3 Hz), 0.88 (s, 9 H), 0.06 (s, 6 H) ppm.

**<sup>13</sup>C NMR** (100 MHz, CDCl<sub>3</sub>) δ 172.0, 75.7, 72.3, 68.8, 51.8, 41.6, 41.4, 41.2, 38.1, 26.0, 25.8, 18.9, 14.1, -4.4 ppm.

**IR** (NaCl, film):  $\tilde{\nu}$  (cm<sup>-1</sup>) = 2954, 2931, 2858, 1743, 1462, 1438, 1377, 1330, 1253, 1195, 1149, 1122, 1072, 1029, 1006, 937, 837, 775, 671.

**HRMS** (ESI+) **C<sub>17</sub>H<sub>34</sub>O<sub>4</sub>Si** (330.54): *m/z* [M+Na]<sup>+</sup> calcd. for C<sub>17</sub>H<sub>34</sub>O<sub>4</sub>SiNa: 353.21186; found: 353.21151.

#### 2.4 *rel*-2-([2*R*,4*R*,6*S*]-4-[(*tert*-Butyldimethylsilyl)oxy]-6-propyltetrahydro-2*H*-pyran-2-yl)ethan-1-ol (**10a**).

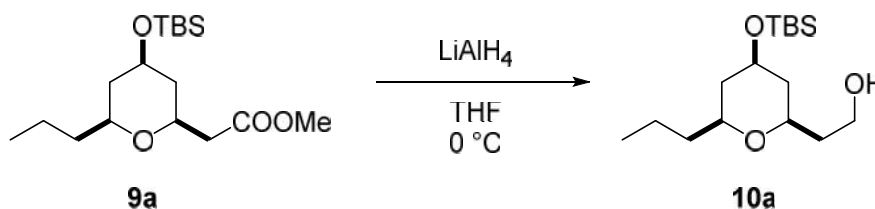

Esters **9a** (475.5 mg, 1.45 mmol, 1.00 eq.) was dissolved in THF (25 mL) under N<sub>2</sub> atmosphere. The solution was cooled down to 0 °C and LiAlH<sub>4</sub> (1.0 M in THF, 2.87 mL, 2.87 mmol, 2.00 eq.) was added dropwise. After 10 minutes the solution was stirred at RT for 1 hour. After completion by TLC, EtOH was dropped until no more H<sub>2</sub> is produced, sodium potassium tartrate sat. (50 mL) was added and stirred for 10

minutes. The aqueous phase was extracted with EtOAc (3 × 50 mL). The combined organic phases were dried over anhydrous Na<sub>2</sub>SO<sub>4</sub>, and concentrated under reduced pressure to obtain compounds **10a** (racemate) (428.6 mg, 1.42 mmol, 98 %) as a colorless oil.

**TLC:**  $R_f$  = 0.19 (EtOAc:PE = 15:85).

**<sup>1</sup>H NMR** (400 MHz, CDCl<sub>3</sub>)  $\delta$  3.79-3.72 (m, 3 H), 3.54 (dddd, 1 H,  $J$  = 11.4, 5.1, 2.8, 1.8 Hz), 3.32 (dddd, 1 H,  $J$  = 11.6, 7.5, 4.0, 1.7 Hz), 2.98 (br s, 1 H), 1.83-1.66 (m, 4 H), 1.58-1.17 (m, 6 H), 0.89 (t, 3 H,  $J$  = 7.3 Hz), 0.88 (s, 9 H), 0.06 (s, 6 H) ppm.

**<sup>13</sup>C NMR** (100 MHz, CDCl<sub>3</sub>)  $\delta$  76.5, 75.9, 68.7, 61.8, 41.8, 41.6, 38.2, 37.7, 26.0, 19.0, 18.2, 14.2, -4.4 ppm.

**IR** (NaCl, film):  $\tilde{\nu}$  (cm<sup>-1</sup>) = 3425, 2954, 2935, 2858, 1465, 1377, 1327, 1253, 1153, 1122, 1080, 1006, 956, 910, 856, 837, 775, 671.

**HRMS** (ESI+) C<sub>16</sub>H<sub>34</sub>O<sub>3</sub>Si (302.53):  $m/z$  [M+Na]<sup>+</sup> calcd. for C<sub>16</sub>H<sub>34</sub>O<sub>3</sub>SiNa: 325.21694; found: 325.21895.

## 2.5 *rel*-2-([2*S*,4*R*,6*S*]-4-[[*tert*-Butyldimethylsilyl]oxy]-6-propyltetrahydro-2*H*-pyran-2-yl)acetaldehyde (**11a**).

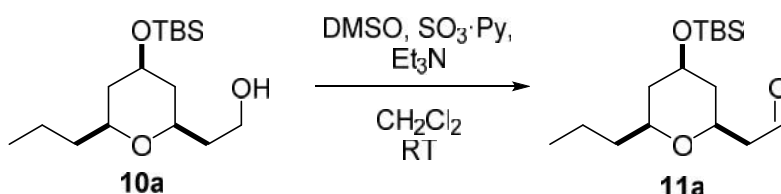

Alcohols **10a** (200.0 mg, 0.66 mmol, 1.00 eq.) was dissolved in CH<sub>2</sub>Cl<sub>2</sub> (20 mL) under N<sub>2</sub> atmosphere and DMSO (671.1 mg, 0.61 mL, 8.59 mmol, 13.00 eq.) and Et<sub>3</sub>N (468.5 mg, 0.65 mL, 4.63 mmol, 7.00 eq.) were added. After 15 minutes SO<sub>3</sub>·Py (733.2 mg, 4.63 mmol, 7 eq.) was added and the solution stirred overnight. After completion by TLC, brine (20 mL) and H<sub>2</sub>O (5 mL) were added and the aqueous phase was extracted with CH<sub>2</sub>Cl<sub>2</sub> (2 × 20 mL). The combined organic phases were dried over anhydrous Na<sub>2</sub>SO<sub>4</sub>, and concentrated under reduced pressure. The crude reaction mixture was purified by column chromatography (SiO<sub>2</sub>, EtOAc:PE 10:90) to obtain compounds **11a** (racemate) (120.9 mg, 0.40 mmol, 61 %) as a colorless oil.

**TLC:**  $R_f$  = 0.53 (EtOAc:PE = 20:80).

**<sup>1</sup>H NMR** (400 MHz, CDCl<sub>3</sub>) δ 9.79 (dd, 1 H, *J* = 2.2, 2.2 Hz), 3.86-3.75 (m, 2 H), 3.31 (dddd, 1 H, *J* = 11.5, 7.5, 4.2, 1.8 Hz), 2.64 (ddd, 1 H, *J* = 16.4, 8.3, 2.2 Hz), 2.46 (ddd, 1 H, *J* = 16.4, 4.4, 2.2 Hz), 1.87-1.78 (m, 2 H), 1.54-1.16 (m, 6 H), 0.89 (t, 3 H, *J* = 7.3 Hz), 0.88 (s, 9 H), 0.06 (s, 6 H) ppm.

**<sup>13</sup>C NMR** (100 MHz, CDCl<sub>3</sub>) δ 201.5, 75.8, 70.9, 68.6, 49.6, 41.6, 38.2, 25.9, 18.9, 18.2, 14.1, -4.4 ppm.

**IR** (NaCl, film):  $\tilde{\nu}$  (cm<sup>-1</sup>) = 3444, 2954, 2931, 2858, 2715, 1728, 1465, 1377, 1330, 1253, 1153, 1122, 1076, 1033, 956, 906, 856, 837, 775, 671.

**HRMS** (ESI+) **C<sub>16</sub>H<sub>32</sub>O<sub>3</sub>Si** (300.51): *m/z* [M+Na]<sup>+</sup> calcd. for C<sub>16</sub>H<sub>32</sub>O<sub>3</sub>SiNa: 323.20129; found: 323.20045.

**2.6** *rel-tert*-Butyldimethyl[({2*R*,4*R*,6*S*}-2-{prop-2-yn-1-yl}-6-propyltetrahydro-2*H*-pyran-4-yl]oxy)silane (**12a**).

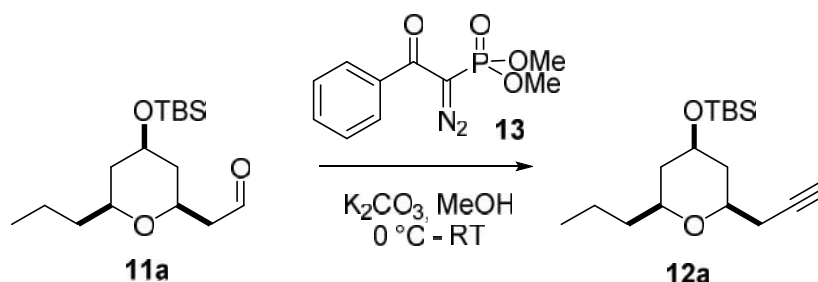

Aldehydes **11a** (119.0 mg, 0.40 mmol, 1.00 eq.) was dissolved in MeOH (3 mL) under N<sub>2</sub> atmosphere and K<sub>2</sub>CO<sub>3</sub> (218.9 mg, 1.58 mmol, 4.00 eq.) was added. The reaction was cooled down to 0 °C and the diazo compound **13** (140.9 mg, 0.55 mmol, 1.40 eq.) was added as a solution in MeOH (4 mL). After 10 minutes the solution was allowed to reach room temperature and stirred overnight. After completion by TLC, NaHCO<sub>3</sub> sat. (10 mL) and Et<sub>2</sub>O (20 mL) were added and the aqueous phase was extracted with Et<sub>2</sub>O (2 × 20 mL). The combined organic phases were dried over anhydrous Na<sub>2</sub>SO<sub>4</sub>, and concentrated under reduced pressure. The crude reaction mixture was purified by column chromatography (SiO<sub>2</sub>, EtOAc:PE 5:95) to obtain compounds **12a** (racemate) (79.9 mg, 0.27 mmol, 68 %) as a colorless oil.

**TLC:** *R<sub>f</sub>* = 0.75 (EtOAc:PE = 10:90).

**<sup>1</sup>H NMR** (400 MHz, CDCl<sub>3</sub>) δ 3.76 (dddd, 1 H, *J* = 10.8, 10.8, 4.6, 4.5 Hz), 3.42 (dddd, 1 H, *J* = 11.4, 7.5, 5.7, 1.9 Hz), 3.28 (dddd, 1 H, *J* = 11.6, 7.0, 4.6, 1.9 Hz), 2.50 (ddd, 1 H, *J*

= 16.6, 5.7, 2.7 Hz), 2.32 (ddd, 1 H,  $J$  = 16.6, 7.5, 2.7 Hz), 2.03 (dddd, 1 H,  $J$  = 12.5, 4.5, 1.9, 1.9 Hz), 2.01 (dd, 1 H,  $J$  = 2.7, 2.7 Hz), 1.79 (dddd, 1 H,  $J$  = 12.5, 4.6, 1.9, 1.9 Hz), 1.57-1.32 (m, 4 H), 1.27-1.15 (m, 2 H), 0.91 (t, 3 H,  $J$  = 7.1 Hz), 0.89 (s, 9 H), 0.07 (s, 6 H) ppm.

**$^{13}\text{C}$  NMR** (100 MHz,  $\text{CDCl}_3$ )  $\delta$  81.0, 75.8, 73.9, 70.0, 68.9, 41.6, 40.9, 38.3, 26.0, 25.9, 18.9, 18.2, 14.2, -4.4 ppm.

**IR** (NaCl, film):  $\tilde{\nu}$  ( $\text{cm}^{-1}$ ) = 3313, 2954, 2931, 2858, 1465, 1442, 1381, 1253, 1153, 1122, 1076, 1006, 975, 933, 910, 867, 837, 775, 667, 636.

**HRMS** (ESI+)  $\text{C}_{17}\text{H}_{32}\text{O}_2\text{Si}$  (296.53):  $m/z$   $[\text{M}+\text{Na}]^+$  calcd. for  $\text{C}_{17}\text{H}_{32}\text{O}_2\text{SiNa}$ : 319.20638; found: 319.20700.

## 2.7 2-Methylhex-5-en-3-ol (**7b**).

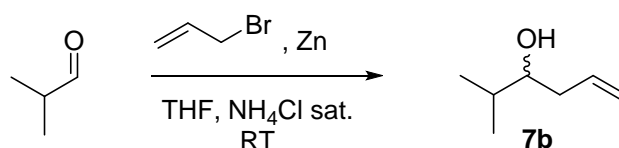

Zn (859.4 mg, 13.1 mmol, 1.20 eq.) was added to  $\text{NH}_4\text{Cl}$  sat. (10 mL) and a solution of isobutyraldehyde (790.0 mg, 1.00 mL, 11.0 mmol, 1.00 eq.) in THF (1 mL) was added. Allyl bromide (1.59 g, 1.14 mL, 13.1 mmol, 1.20 eq.) was added dropwise and the reaction was stirred overnight at room temperature. After completion,  $\text{Et}_2\text{O}$  (20 mL) was added and the solids were filtered. The phases were separated and the aqueous phase was further extracted with  $\text{Et}_2\text{O}$  ( $2 \times 20$  mL). The combined organic phases were dried over anhydrous  $\text{Na}_2\text{SO}_4$ , and concentrated under reduced pressure at low temperature. The crude reaction mixture was purified by column chromatography ( $\text{SiO}_2$ ,  $\text{EtOAc}:\text{PE}$  15:85) to obtain compounds **7b** (766.4 mg, 6.71 mmol, 61 %) as a solution 78 % in  $\text{EtOAc}$ .

**TLC:**  $R_f$  = 0.36 ( $\text{EtOAc}:\text{PE}$  = 15:85).

**$^1\text{H}$  NMR** (400 MHz,  $\text{CDCl}_3$ )  $\delta$  5.85 ( $m_c$ , 1 H), 5.18-5.13 (m, 2 H), 3.41 ( $m_c$ , 1 H), 2.32 ( $m_c$ , 1 H), 2.12 ( $m_c$ , 1 H), 1.70 ( $m_c$ , 1 H), 0.95 (d, 3 H,  $J$  = 6.8 Hz), 0.94 (d, 3 H,  $J$  = 6.8 Hz) ppm.

Data was comparable to that available in the literature.<sup>3</sup>



**2.8 *rel*-Methyl 2-([2*S*,4*S*,6*R*]-4-hydroxy-6-isopropyltetrahydro-2*H*-pyran-2-yl)acetate (8b).**

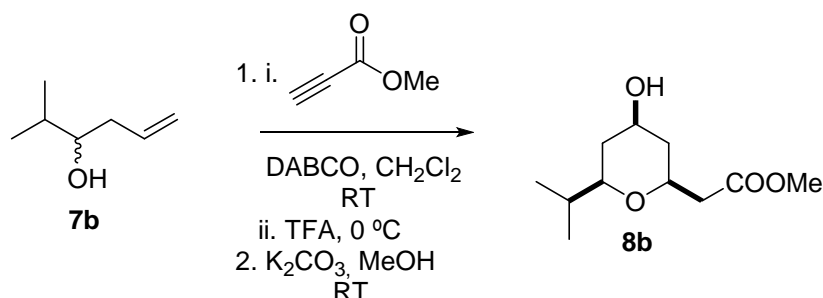

Alcohols **7b** (766.4 mg, 6.71 mmol, 1.00 eq.) was dissolved in  $\text{CH}_2\text{Cl}_2$  (10 mL) under  $\text{N}_2$  atmosphere and DABCO (37.6 mg, 0.34 mmol, 0.05 eq.) was added. Methyl propiolate (0.62 g, 0.66 mL, 7.38 mmol, 1.10 eq.) was added dropwise as a solution in  $\text{CH}_2\text{Cl}_2$  (5 mL) and the solution was stirred at RT for 1 hour. After completion by TLC, the solution was cooled down to  $0\text{ }^\circ\text{C}$ , and TFA (7.65 g, 5.46 mL, 67.10 mmol, 10.00 eq.) was added dropwise. After completion by TLC,  $\text{NaHCO}_3$  sat. (20 mL) was added. The phases were separated and the aqueous phase was extracted with  $\text{CH}_2\text{Cl}_2$  ( $3 \times 25\text{ mL}$ ). The combined organic phases were dried over anhydrous  $\text{Na}_2\text{SO}_4$ , and concentrated under reduced pressure. Under  $\text{N}_2$  atmosphere, the crude reaction was dissolved in dry MeOH (6 mL) and dry  $\text{K}_2\text{CO}_3$  (1.85 g, 13.42 mmol, 2.00 eq.) was added at RT. After completion by TLC, HCl 1 M (20 mL) was added and the aqueous phase was extracted with  $\text{CH}_2\text{Cl}_2$  ( $3 \times 25\text{ mL}$ ). The combined organic phases were dried over anhydrous  $\text{Na}_2\text{SO}_4$ , and concentrated under reduced pressure. The crude reaction mixture was purified by column chromatography ( $\text{SiO}_2$ , EtOAc:PE 60:40) to obtain compounds **8b** (racemate) (777.9 mg, 3.60 mmol, 54 %, three steps) as a colorless oil.

**TLC:**  $R_f = 0.24$  (EtOAc:PE = 50:50).

**$^1\text{H}$  NMR** (400 MHz,  $\text{CDCl}_3$ )  $\delta$  3.82 (dddd, 1 H,  $J = 13.9, 13.9, 4.4, 4.4\text{ Hz}$ ), 3.73 ( $m_c$ , 1 H), 3.69 (s, 3 H), 2.99 (ddd, 1 H,  $J = 11.3, 6.8, 1.8\text{ Hz}$ ), 2.59 (dd, 1 H,  $J = 15.0, 8.2\text{ Hz}$ ), 2.44 (dd, 1 H,  $J = 15.0, 5.3\text{ Hz}$ ), 2.02-1.95 (m, 2 H), 1.67 ( $m_c$ , 1 H), 1.22-1.08 (m, 2 H), 0.91 (d, 3 H,  $J = 6.7\text{ Hz}$ ), 0.88 (d, 3 H,  $J = 6.7\text{ Hz}$ ) ppm.

**$^{13}\text{C}$  NMR** (100 MHz,  $\text{CDCl}_3$ )  $\delta$  171.2, 80.7, 72.0, 68.3, 51.6, 41.0, 40.7, 37.7, 32.8, 18.6, 18.4 ppm.

**IR** (NaCl, film):  $\tilde{\nu}$  ( $\text{cm}^{-1}$ ) = 3385, 2955, 2874, 1734, 1437, 1375, 1332, 1271, 1198, 1152, 1084, 1043, 879.

**HRMS** (ESI+)  $\text{C}_{11}\text{H}_{20}\text{O}_4$  (216.28):  $m/z$   $[\text{M}+\text{Na}]^+$  calcd. for  $\text{C}_{11}\text{H}_{20}\text{O}_4\text{Na}$ : 239.1254; found: 239.1274.

**2.9 *rel*-Methyl 2-([2*S*,4*S*,6*R*]-4-[(*tert*-butyldimethylsilyl)oxy]-6-isopropyltetrahydro-2*H*-pyran-2-yl)acetate (**9b**).**

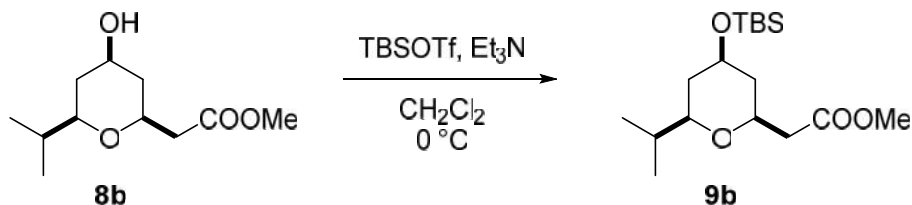

Alcohols **8b** (778.0 mg, 3.60 mmol, 1.00 eq.) was dissolved in CH<sub>2</sub>Cl<sub>2</sub> (14 mL) under N<sub>2</sub> atmosphere and Et<sub>3</sub>N (728.0 mg, 1.00 mL, 7.19 mmol, 2.00 eq.) was added. The solution was cooled down to 0 °C and TBSOTf (1.43 g, 1.24 mL, 5.40 mmol, 1.50 eq.) was added dropwise. After 10 minutes at this temperature, the solution was stirred at RT for 7 hour. After completion by TLC, HCl 1M (20 mL) was added and the aqueous phase was extracted with CH<sub>2</sub>Cl<sub>2</sub> (3 × 25 mL). The combined organic phases were dried over anhydrous Na<sub>2</sub>SO<sub>4</sub>, and concentrated under reduced pressure. The crude reaction mixture was purified by column chromatography (SiO<sub>2</sub>, EtOAc:PE 10:90) to obtain compounds **9b** (racemate) (752.5 mg, 2.28 mmol, 63 %) as a colorless oil.

**TLC:** *R<sub>f</sub>* = 0.80 (EtOAc:PE = 20:80).

**<sup>1</sup>H NMR** (400 MHz, CDCl<sub>3</sub>) δ 3.79-3.67 (m, 2 H), 3.67 (s, 3 H), 2.95 (ddd, 1 H, *J* = 11.5, 6.6, 1.7 Hz), 2.54 (dd, 1 H, *J* = 15.0, 8.3 Hz), 2.39 (dd, 1 H, *J* = 15.0, 5.0 Hz), 1.85-1.77 (m, 2 H), 1.63 (m<sub>c</sub>, 1 H), 1.26-1.11 (m, 2 H), 0.89-0.84 (m, 15 H), 0.05 (s, 3 H), 0.04 (s, 3 H) ppm.

**<sup>13</sup>C NMR** (100 MHz, CDCl<sub>3</sub>) δ 171.8, 80.7, 72.1, 69.0, 51.5, 41.3, 41.1, 38.2, 32.8, 25.8, 25.7, 18.5, 18.1, -3.0, -4.6 ppm.

**IR** (NaCl, film):  $\tilde{\nu}$  (cm<sup>-1</sup>) = 2955, 2930, 2886, 2859, 1744, 1464, 1437, 1373, 1254, 1198, 1153, 1119, 1070, 1005, 887, 837, 775, 669.

**HRMS** (ESI+) **C<sub>17</sub>H<sub>34</sub>O<sub>4</sub>Si** (330.54): *m/z* [M+Na]<sup>+</sup> calcd. for C<sub>17</sub>H<sub>34</sub>O<sub>4</sub>SiNa: 353.2119; found: 353.2131.

**2.10** *rel*-2-([2*R*,4*S*,6*R*]-4-[(*tert*-Butyldimethylsilyl)oxy]-6-isopropyltetrahydro-2*H*-pyran-2-yl)ethan-1-ol (**10b**).

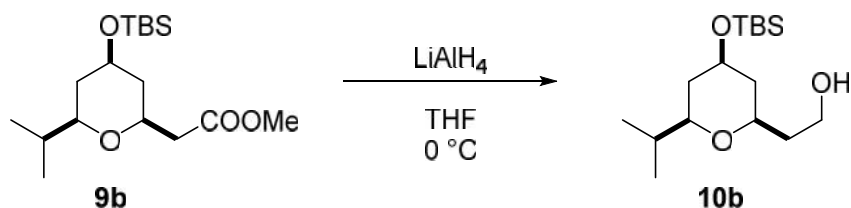

Esters **9b** (752.5 mg, 2.28 mmol, 1.00 eq.) was dissolved in THF (25 mL) under N<sub>2</sub> atmosphere. The solution was cooled down to 0 °C and LiAlH<sub>4</sub> (1.0 M in THF, 4.55 mL, 4.55 mmol, 2.00 eq.) was added dropwise. After 10 minutes the solution was stirred at RT for 1 hour. After completion by TLC, EtOH was dropped until no more H<sub>2</sub> is produced, sodium potassium tartrate sat. (25 mL) was added and stirred for 10 minutes. The aqueous phase was extracted with EtOAc (3 × 25 mL). The combined organic phases were dried over anhydrous Na<sub>2</sub>SO<sub>4</sub>, and concentrated under reduced pressure to obtain compounds **10b** (racemate) (683.9 mg, 2.26 mmol, 99 %) as a colorless oil.

**TLC:** *R*<sub>f</sub> = 0.43 (EtOAc:PE = 20:80).

**<sup>1</sup>H NMR** (400 MHz, CDCl<sub>3</sub>) δ 3.79-3.73 (m, 3 H), 3.54 (m<sub>c</sub>, 1 H), 3.07 (ddd, 1 H, *J* = 11.8, 5.8, 1.3 Hz), 2.94 (br s, 1 H), 1.87-1.62 (m, 5 H), 1.37-1.18 (m, 2 H), 0.93-0.86 (m, 15 H), 0.07 (s, 6 H) ppm.

**<sup>13</sup>C NMR** (100 MHz, CDCl<sub>3</sub>) δ 81.0, 76.5, 68.9, 61.8, 41.7, 38.1, 37.5, 32.7, 25.8, 25.7, 18.6, 18.4, -4.5 ppm.

**IR** (NaCl, film):  $\tilde{\nu}$  (cm<sup>-1</sup>) = 2955, 2932, 2886, 2859, 2367, 2342, 1471, 1462, 1437, 1426, 1375, 1254, 1157, 1123, 1075, 901, 837, 776.

**HRMS** (ESI+) **C<sub>16</sub>H<sub>34</sub>O<sub>3</sub>Si** (302.53): *m/z* [M+Na]<sup>+</sup> calcd. for C<sub>16</sub>H<sub>34</sub>O<sub>3</sub>SiNa: 325.2169; found: 325.2162.

**2.11** *rel*-2-([2*S*,4*S*,6*R*]-4-[(*tert*-Butyldimethylsilyl)oxy]-6-isopropyltetrahydro-2*H*-pyran-2-yl)acetaldehyde (**11b**).

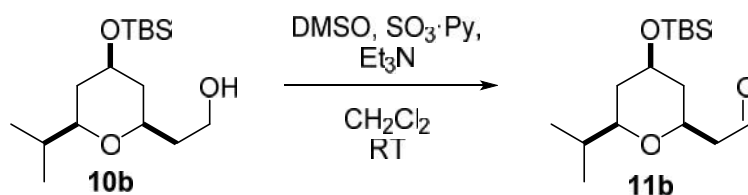

Alcohols **10b** (670.0 mg, 2.21 mmol, 1.00 eq.) was dissolved in CH<sub>2</sub>Cl<sub>2</sub> (30 mL) under N<sub>2</sub> atmosphere and DMSO (1.73 g, 1.57 mL, 22.15 mmol, 10.00 eq.) and Et<sub>3</sub>N (1.34 g, 1.85 mL, 13.29 mmol, 6.00 eq.) were added. After 15 minutes SO<sub>3</sub>·Py (1.75 g, 11.07 mmol, 5 eq.) was added and the solution stirred overnight. After completion by TLC, brine (30 mL) was added and the aqueous phase was extracted with CH<sub>2</sub>Cl<sub>2</sub> (3 × 30 mL). The combined organic phases were dried over anhydrous Na<sub>2</sub>SO<sub>4</sub>, and concentrated under reduced pressure. The crude reaction mixture was purified by column chromatography (SiO<sub>2</sub>, EtOAc:PE 15:85) to obtain compounds **11b** (racemate) (568.4 mg, 1.89 mmol, 85 %) as a colorless oil.

**TLC:** *R*<sub>f</sub> = 0.63 (EtOAc:PE = 20:80).

**<sup>1</sup>H NMR** (400 MHz, CDCl<sub>3</sub>) δ 9.79 (dd, 1 H, *J* = 2.6, 2.0 Hz), 3.83-3.74 (m, 2 H), 3.02 (ddd, 1 H, *J* = 11.4, 6.2, 1.7 Hz), 2.61 (ddd, 1 H, *J* = 16.2, 8.3, 2.6 Hz), 2.45 (ddd, 1 H, *J* = 16.2, 4.3, 2.0 Hz), 1.86-1.78 (m, 2 H), 1.66 (m<sub>c</sub>, 1 H), 1.30-1.15 (m, 2 H), 0.94-0.85 (m, 6 H), 0.89 (s, 9 H), 0.07 (s, 3 H), 0.06 (s, 3 H) ppm.

**<sup>13</sup>C NMR** (100 MHz, CDCl<sub>3</sub>) δ 201.6, 80.8, 70.8, 68.9, 49.4, 41.5, 38.1, 32.8, 25.8, 18.5, 18.4, 18.1, -4.5, -4.6 ppm.

**IR** (NaCl, film):  $\tilde{\nu}$  (cm<sup>-1</sup>) = 2955, 2930, 2857, 2723, 1728, 1474, 1375, 1254, 1155, 1119, 1070, 891, 837, 775, 669.

**HRMS** (ESI+) **C<sub>16</sub>H<sub>32</sub>O<sub>3</sub>Si** (300.51): *m/z* [M+Na]<sup>+</sup> calcd. for C<sub>16</sub>H<sub>32</sub>O<sub>3</sub>SiNa: 323.2013; found: 323.2012.

**2.12 *rel-tert*-Butyl([{2*R*,4*S*,6*R*}-2-isopropyl-6-{prop-2-yn-1-yl}tetrahydro-2*H*-pyran-4-yl]oxy)dimethylsilane (**12b**).**

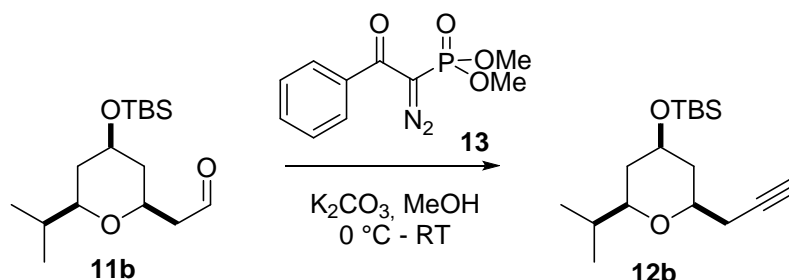

Aldehydes **11b** (250.0 mg, 0.83 mmol, 1.00 eq.) was dissolved in MeOH (6 mL) under N<sub>2</sub> atmosphere and K<sub>2</sub>CO<sub>3</sub> (459.9 mg, 3.33 mmol, 4.00 eq.) was added. The reaction was cooled down to 0 °C and the diazo compound **13** (296.0 mg, 1.16 mmol, 1.40 eq.) was added as a solution in MeOH (6 mL). After 10 minutes the solution was allowed to reach room temperature and stirred overnight. After completion by TLC, brine (20 mL) and CH<sub>2</sub>Cl<sub>2</sub> (20 mL) were added and the aqueous phase was extracted with CH<sub>2</sub>Cl<sub>2</sub> (2 × 20 mL). The combined organic phases were dried over anhydrous Na<sub>2</sub>SO<sub>4</sub>, and concentrated under reduced pressure. The crude reaction mixture was purified by column chromatography (SiO<sub>2</sub>, EtOAc:PE 5:95) to obtain compounds **12b** (racemate) (179.2 mg, 0.60 mmol, 73 %) as a colorless oil.

**TLC:** *R*<sub>f</sub> = 0.76 (EtOAc:PE = 10:90).

**<sup>1</sup>H NMR** (400 MHz, CDCl<sub>3</sub>) δ 3.74 (dddd, 1 H, *J* = 10.5, 10.5, 4.8, 4.8 Hz), 3.39 (dddd, 1 H, *J* = 11.3, 7.4, 5.9, 1.9 Hz), 2.98 (ddd, 1 H, *J* = 11.4, 6.1, 1.6 Hz), 2.47 (ddd, 1 H, *J* = 16.6, 5.6, 2.7 Hz), 2.30 (ddd, 1 H, *J* = 16.6, 7.3, 2.7 Hz), 2.03-1.97 (m, 1 H), 1.98 (dd, 1 H, *J* = 2.7, 2.7 Hz), 1.78 (m, 1 H), 1.68 (m, 1 H), 1.24-1.23 (m, 2 H), 0.92 (d, 3 H, *J* = 6.7 Hz), 0.88 (d, 3 H, *J* = 6.5 Hz), 0.88 (s, 9 H), 0.06 (s, 6 H) ppm.

**<sup>13</sup>C NMR** (100 MHz, CDCl<sub>3</sub>) δ 81.0, 80.7, 73.7, 69.8, 69.1, 40.8, 37.9, 32.8, 29.7, 25.8, 25.7, 18.6, 18.3, -4.5 ppm.

**IR** (NaCl, film):  $\tilde{\nu}$  (cm<sup>-1</sup>) = 3316, 2955, 2929, 2857, 1464, 1379, 1254, 1155, 1121, 1092, 1072, 1007, 893, 876, 837, 775, 669, 638, 559.

**HRMS** (ESI+) **C<sub>17</sub>H<sub>32</sub>O<sub>2</sub>Si** (296.53): *m/z* [M+Na]<sup>+</sup> calcd. for C<sub>17</sub>H<sub>32</sub>O<sub>2</sub>SiNa: 319.2064; found: 319.2063.

### 2.13 1-Phenylhex-5-en-3-ol (7c).

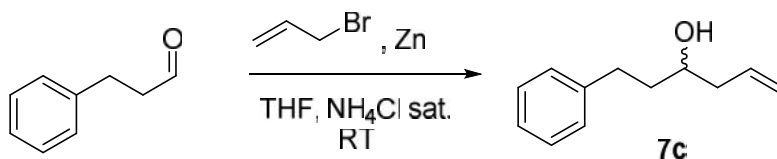

Zn (595.5 mg, 9.11 mmol, 1.20 eq.) was added to NH<sub>4</sub>Cl sat. (10 mL) and a solution of hydrocinnamaldehyde (1.02 g, 1.00 mL, 7.59 mmol, 1.00 eq.) in THF (1 mL) was added. Allyl bromide (1.10 g, 0.79 mL, 9.11 mmol, 1.20 eq.) was added dropwise and the reaction was stirred overnight at room temperature. After completion, Et<sub>2</sub>O (20 mL) was added, the solids were filtered and washed with Et<sub>2</sub>O. The phases were separated and the aqueous phase was further extracted with Et<sub>2</sub>O (3 × 25 mL). The combined organic phases were dried over anhydrous Na<sub>2</sub>SO<sub>4</sub>, and concentrated under reduced pressure. The crude reaction mixture was purified by column chromatography (SiO<sub>2</sub>, EtOAc:PE 15:85) to obtain compounds **7c** (1.12 g, 6.34 mmol, 83 %) as a colorless oil.

**TLC:** *R*<sub>f</sub> = 0.36 (EtOAc:PE = 20:80).

**<sup>1</sup>H NMR** (400 MHz, CDCl<sub>3</sub>) δ 7.30-7.25 (m, 2 H), 7.21-7.16 (m, 3 H), 5.81 (dddd, 1 H, *J* = 19.4, 9.6, 7.9, 6.6 Hz), 5.16 (m<sub>c</sub>, 1 H), 5.12 (m<sub>c</sub>, 1 H), 3.67 (m<sub>c</sub>, 1 H), 2.81 (m<sub>c</sub>, 1 H), 2.68 (m<sub>c</sub>, 1 H), 2.32 (m<sub>c</sub>, 1 H), 2.18 (m<sub>c</sub>, 1 H) 1.81-1.76 (m, 2 H) ppm.

**<sup>13</sup>C NMR** (100 MHz, CDCl<sub>3</sub>) δ 142.2, 134.8, 128.6, 128.5, 125.9, 118.5, 70.0, 42.2, 38.6, 32.2 ppm.

Data was comparable to that available in the literature.<sup>4</sup>

### 2.14 *rel*-Methyl 2-([2*S*,4*R*,6*S*]-4-hydroxy-6-phenethyltetrahydro-2*H*-pyran-2-yl)acetate (8c).

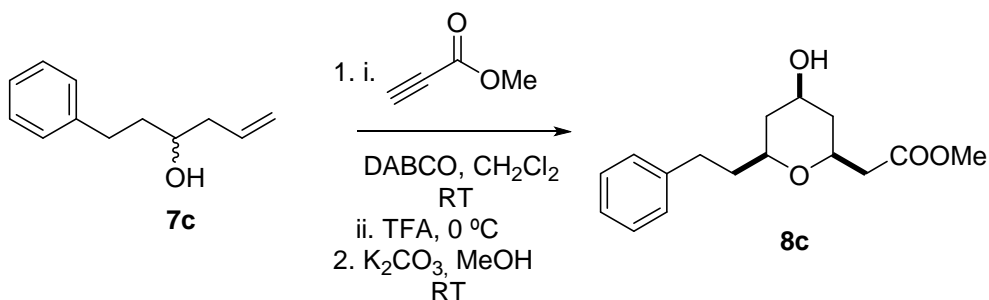

Alcohols **7c** (940.4 mg, 5.34 mmol, 1.00 eq.) was dissolved in CH<sub>2</sub>Cl<sub>2</sub> (10 mL) under N<sub>2</sub> atmosphere and DABCO (29.9 mg, 0.27 mmol, 0.05 eq.) was added. Methyl propiolate

(493.4 mg, 0.52 mL, 5.87 mmol, 1.10 eq.) was added dropwise as a solution in CH<sub>2</sub>Cl<sub>2</sub> (5 mL) and the solution was stirred at RT for 1 hour. After completion by TLC, the solution was cooled down to 0 °C, and TFA (6.09 g, 3.96 mL, 53.36 mmol, 10.00 eq.) was added dropwise. After completion by TLC, NaHCO<sub>3</sub> sat. (20 mL) was added. The phases were separated and the aqueous phase was extracted with CH<sub>2</sub>Cl<sub>2</sub> (3 × 20 mL). The combined organic phases were dried over anhydrous Na<sub>2</sub>SO<sub>4</sub>, and concentrated under reduced pressure. Under N<sub>2</sub> atmosphere, the crude reaction was dissolved in dry MeOH (7 mL) and dry K<sub>2</sub>CO<sub>3</sub> (1.47 g, 10.67 mmol, 2.00 eq.) was added at RT. After completion by TLC, reaction was diluted with CH<sub>2</sub>Cl<sub>2</sub> (20 mL), filtered through a pad of Celite, washed with CH<sub>2</sub>Cl<sub>2</sub> and concentrated under reduced pressure. The residue was taken in CH<sub>2</sub>Cl<sub>2</sub> (25 mL) and HCl 1 M (25 mL) and the aqueous phase was extracted with CH<sub>2</sub>Cl<sub>2</sub> (2 × 25 mL). The combined organic phases were dried over anhydrous Na<sub>2</sub>SO<sub>4</sub>, and concentrated under reduced pressure. The crude reaction mixture was purified by column chromatography (SiO<sub>2</sub>, EtOAc:PE 70:30) to obtain compounds **8c** (racemate) (703.6 mg, 2.53 mmol, 47 %, three steps) as a colorless oil.

**TLC:** *R*<sub>f</sub> = 0.18 (EtOAc:PE = 40:60).

**<sup>1</sup>H NMR** (400 MHz, CDCl<sub>3</sub>) δ 7.30-7.26 (m, 2 H), 7.20-7.16 (m, 3 H), 3.84-3.73 (m, 2 H), 3.72 (s, 3 H), 3.28 (dddd, 1 H, *J* = 11.0, 8.9, 3.8, 1.9 Hz), 2.77-2.61 (m, 3 H), 2.47 (dd, 1 H, *J* = 15.1, 5.1 Hz), 2.00 (dddd, 1 H, *J* = 12.1, 6.4, 4.7, 1.8 Hz), 1.92-1.83 (m, 2 H), 1.56-1.30 (m, 4 H), 1.69 (m<sub>C</sub>, 1 H), 1.25-1.15 (m, 2 H) ppm.

**<sup>13</sup>C NMR** (100 MHz, CDCl<sub>3</sub>) δ 171.8, 142.1, 128.7, 128.5, 125.9, 74.4, 72.2, 67.9, 51.9, 41.2, 41.0, 40.8, 37.6, 31.7 ppm.

**IR** (NaCl, film):  $\tilde{\nu}$  (cm<sup>-1</sup>) = 2947, 2920, 1736, 1719, 1437, 1375, 1331, 1271, 1198, 1145, 1082, 1059, 1030, 750, 702.

**HRMS** (ESI+) C<sub>16</sub>H<sub>22</sub>O<sub>4</sub> (278.35): *m/z* [M+Na]<sup>+</sup> calcd. for C<sub>16</sub>H<sub>22</sub>O<sub>4</sub>Na: 301.1410; found: 301.1415.

**2.15 *rel*-Methyl 2-([2*S*,4*R*,6*S*]-4-[(*tert*-butyldimethylsilyl)oxy]-6-phenethyltetrahydro-2*H*-pyran-2-yl)acetate (**9c**).**

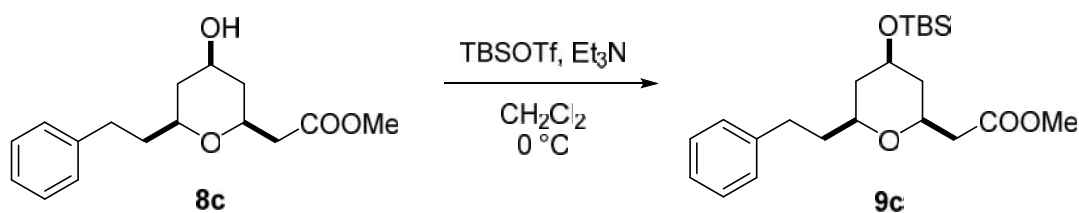

Alcohols **8c** (656.1 mg, 2.36 mmol, 1.00 eq.) was dissolved in CH<sub>2</sub>Cl<sub>2</sub> (10 mL) under N<sub>2</sub> atmosphere and Et<sub>3</sub>N (715.5 mg, 0.99 mL, 7.07 mmol, 3.00 eq.) was added. The solution was cooled down to 0 °C and TBSOTf (934.6 mg, 0.81 mL, 3.54 mmol, 1.50 eq.) was added dropwise. After 10 minutes at this temperature, the solution was stirred at RT for 1 hour. After completion by TLC, HCl 1 M (20 mL) was added and the aqueous phase was extracted with CH<sub>2</sub>Cl<sub>2</sub> (3 × 20 mL). The combined organic phases were washed with NaHCO<sub>3</sub> sat. (10 mL), dried over anhydrous Na<sub>2</sub>SO<sub>4</sub>, and concentrated under reduced pressure. The crude reaction mixture was purified by column chromatography (SiO<sub>2</sub>, EtOAc:PE 10:90) to obtain compounds **9c** (racemate) (588.5 mg, 1.50 mmol, 64 %) as a colorless oil.

**TLC:** *R*<sub>f</sub> = 0.79 (EtOAc:PE = 40:60).

**<sup>1</sup>H NMR** (400 MHz, CDCl<sub>3</sub>) δ 7.29-7.26 (m, 2 H), 7.20-7.16 (m, 3 H), 3.77-3.72 (m, 2 H), 3.72 (s, 3 H), 3.24 (m<sub>c</sub>, 1 H), 2.73-2.58 (m, 3 H), 2.44 (dd, 1 H, *J* = 15.1, 4.8 Hz), 1.85 (m<sub>c</sub>, 1 H), 1.74 (m<sub>c</sub>, 1 H), 1.65 (m<sub>c</sub>, 1 H), 1.29-1.18 (m, 2 H), 0.87 (s, 9 H), 0.04 (s, 6 H) ppm.

**<sup>13</sup>C NMR** (100 MHz, CDCl<sub>3</sub>) δ 172.0, 142.3, 128.8, 128.5, 125.8, 74.3, 72.3, 68.6, 51.8, 41.6, 41.4, 41.3, 37.7, 31.7, 26.0, 18.2, -4.3, -4.4 ppm.

**IR** (NaCl, film):  $\tilde{\nu}$  (cm<sup>-1</sup>) = 3026, 2951, 2930, 2886, 1744, 1437, 1375, 1328, 1252, 1196, 1150, 1074, 1005, 870, 837, 775, 748, 700, 669.

**HRMS** (ESI+) **C<sub>22</sub>H<sub>36</sub>O<sub>4</sub>Si** (392.61): *m/z* [M+Na]<sup>+</sup> calcd. for C<sub>22</sub>H<sub>36</sub>O<sub>4</sub>SiNa: 415.2275; found: 415.2278.

## 2.16 *rel*-2-([2*R*,4*R*,6*S*]-4-[(*tert*-butyldimethylsilyl)oxy]-6-phenethyltetrahydro-2*H*-pyran-2-yl)ethan-1-ol (**10c**).

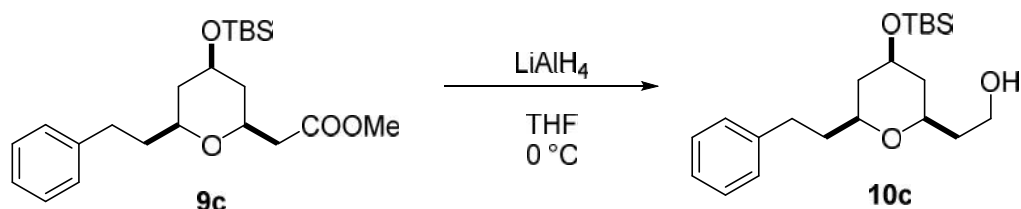

Esters **9c** (568.2 mg, 1.45 mmol, 1.00 eq.) was dissolved in THF (20 mL) under N<sub>2</sub> atmosphere. The solution was cooled down to 0 °C and LiAlH<sub>4</sub> (1.0 M in THF, 2.17 mL, 2.17 mmol, 1.50 eq.) was added dropwise. After 10 minutes the solution was stirred at RT for 1 hour. After completion by TLC, EtOH was dropped until no more H<sub>2</sub> is produced, sodium potassium tartrate sat. (20 mL) was added and stirred for 10 minutes. The aqueous phase was extracted with CH<sub>2</sub>Cl<sub>2</sub> (3 × 20 mL). The combined organic phases were dried over anhydrous Na<sub>2</sub>SO<sub>4</sub>, and concentrated under reduced



pressure to obtain compounds **10c** (racemate) (508.4 mg, 1.39 mmol, 96 %) as a colorless oil.

**TLC:**  $R_f$  = 0.62 (EtOAc:PE = 40:60).

**$^1\text{H}$  NMR** (400 MHz,  $\text{CDCl}_3$ )  $\delta$  7.30-7.26 (m, 2H), 7.20-7.17 (m, 3 H), 3.85-3.81 (m, 2 H), 3.73 (dddd, 1 H,  $J$  = 10.6, 10.6, 4.7, 4.7 Hz), 3.54 (dddd, 1 H,  $J$  = 11.2, 4.9, 2.9, 1.9 Hz), 3.28 ( $m_c$ , 1 H), 2.78-2.62 (m, 3 H), 1.92-1.68 (m, 5 H), 1.38-1.21 (m, 2 H), 0.88 (s, 9 H), 0.05 (s, 6 H) ppm.

**$^{13}\text{C}$  NMR** (100 MHz,  $\text{CDCl}_3$ )  $\delta$  141.9, 128.6, 128.5, 125.9, 76.2, 74.9, 68.6, 61.7, 41.8, 41.6, 37.9, 37.7, 31.9, 26.0, 18.2, -4.4 ppm.

**IR** (NaCl, film):  $\tilde{\nu}$  ( $\text{cm}^{-1}$ ) = 2950, 2932, 2857, 1466, 1459, 1372, 1324, 1254, 1156, 1133, 1077, 1005, 838, 776, 749, 701, 670, 517.

**HRMS** (ESI+)  $\text{C}_{21}\text{H}_{36}\text{O}_3\text{Si}$  (364.60):  $m/z$   $[\text{M}+\text{Na}]^+$  calcd. for  $\text{C}_{21}\text{H}_{36}\text{O}_3\text{SiNa}$ : 387.2326; found: 387.2323.

**2.17** *rel*-2-([2*S*,4*R*,6*S*]-4-[(*tert*-Butyldimethylsilyl)oxy]-6-phenethyltetrahydro-2*H*-pyran-2-yl)acetaldehyde (**11c**).

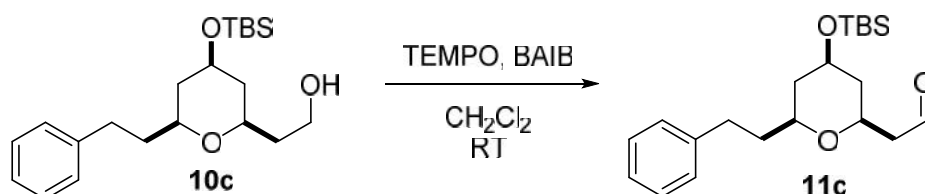

Alcohols **10c** (200.0 mg, 0.54 mmol, 1.00 eq.) was dissolved in  $\text{CH}_2\text{Cl}_2$  (2 mL) and TEMPO (8.6 mg, 0.05 mmol, 0.10 eq.) was added followed by BAIB (194.4 mg, 0.60 mmol, 1.10 eq.) and the solution stirred for 3 h at RT. After completion by TLC, the reaction was diluted with  $\text{CH}_2\text{Cl}_2$  (5 mL) and washed with sodium thiosulfate sat. (1 mL). The aqueous layer was washed with  $\text{CH}_2\text{Cl}_2$  (3 x 1 mL) and the combined organic phases were washed with  $\text{NaHCO}_3$  sat. (1 mL) and brine (1 mL). Both aqueous layers were washed with  $\text{CH}_2\text{Cl}_2$  (5 mL) and the combined organic phases were dried over anhydrous  $\text{Na}_2\text{SO}_4$ , and concentrated under reduced pressure. The crude reaction mixture was purified by column chromatography ( $\text{SiO}_2$ , EtOAc:PE 20:80) to obtain compounds **11c** (racemate) (198.6 mg, 0.54 mmol, quant.) as a yellowish oil.

**TLC:**  $R_f$  = 0.64 (EtOAc:PE = 30:70).

**<sup>1</sup>H NMR** (400 MHz, CDCl<sub>3</sub>) δ 9.83 (dd, 1 H, *J* = 2.0, 2.0 Hz), 7.29-7.24 (m, 2 H), 7.18-7.16 (m, 3 H), 3.85-3.72 (m, 2 H), 3.28 (m<sub>c</sub>, 1 H), 2.78-2.61 (m, 3 H), 2.64 (ddd, 1 H, *J* = 16.4, 4.2, 2.0 Hz), 1.89-1.65 (m, 4 H), 1.33-1.20 (m, 2 H), 0.87 (s, 9 H), 0.05 (s, 6 H) ppm.

**<sup>13</sup>C NMR** (100 MHz, CDCl<sub>3</sub>) δ 201.1, 141.9, 128.4, 128.2, 125.7, 74.4, 70.6, 68.2, 49.4, 41.3, 37.4, 31.5, 25.7, 18.0, -4.6, -4.7 ppm.

**IR** (NaCl, film):  $\tilde{\nu}$  (cm<sup>-1</sup>) = 3026, 2951, 2930, 2857, 1734, 1716, 1449, 1375, 1252, 1155, 1128, 1101, 1072, 1030, 1007, 876, 837, 774, 748, 700, 669.

**HRMS** (ESI+) **C<sub>21</sub>H<sub>34</sub>O<sub>3</sub>Si** (362.56): *m/z* [M+Na]<sup>+</sup> calcd. for C<sub>21</sub>H<sub>34</sub>O<sub>3</sub>SiNa: 385.2169; found: 385.2165.

**2.18 *rel-tert*-Butyldimethyl([{2*S*,4*R*,6*R*}-2-phenethyl-6-{prop-2-yn-1-yl}tetrahydro-2*H*-pyran-4-yl]oxy)silane (**12c**).**

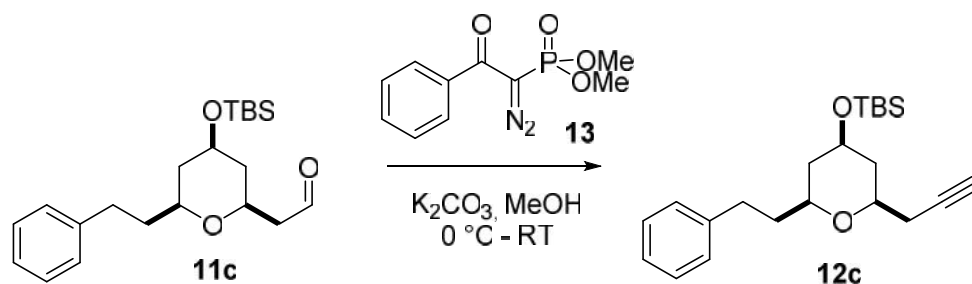

Aldehydes **11c** (180.0 mg, 0.50 mmol, 1.00 eq.) was dissolved in MeOH (5 mL) under N<sub>2</sub> atmosphere and K<sub>2</sub>CO<sub>3</sub> (274.5 mg, 1.99 mmol, 4.00 eq.) was added. The reaction was cooled down to 0 °C and the diazo compound **13** (176.7 mg, 0.70 mmol, 1.40 eq.) was added as a solution in MeOH (4 mL). After 10 minutes the solution was allowed to reach room temperature and stirred for 2 h. After completion by TLC, brine (25 mL) and EtOAc (25 mL) were added and the aqueous phase was extracted with EtOAc (2 × 25 mL). The combined organic phases were dried over anhydrous Na<sub>2</sub>SO<sub>4</sub>, and concentrated under reduced pressure. The crude reaction mixture was purified by column chromatography (SiO<sub>2</sub>, EtOAc:PE 5:95) to obtain compounds **12c** (racemate) (141.5 mg, 0.39 mmol, 79 %) as a colorless oil.

**TLC:** *R<sub>f</sub>* = 0.77 (EtOAc:PE = 20:80).

**<sup>1</sup>H NMR** (400 MHz, CDCl<sub>3</sub>) δ 7.29-7.25 (m, 2 H), 7.21-7.18 (m, 3 H), 3.73 (dddd, 1 H, *J* = 10.7, 10.7, 4.7, 4.7 Hz), 3.41 (dddd, 1 H, *J* = 11.4, 8.1, 6.9, 1.8 Hz), 3.23 (dddd, 1 H, *J* = 11.0, 8.6, 4.1, 1.8 Hz), 2.81-2.68 (m, 2 H), 2.53 (ddd, 1 H, *J* = 16.7, 6.1, 2.7 Hz), 2.35

(ddd, 1 H,  $J = 16.7, 6.9, 2.7$  Hz), 2.03 (dd, 1 H,  $J = 2.7, 2.7$  Hz), 2.00 (dddd, 1 H,  $J = 12.5, 4.1, 1.7, 1.7$  Hz), 1.89 (dtd, 1 H,  $J = 13.9, 8.4, 5.6$  Hz), 1.76 (dddd, 1 H,  $J = 12.5, 4.2, 1.8, 1.8$  Hz), 1.69 (m, 1 H), 1.28-1.20 (m, 2 H), 0.88 (s, 9 H), 0.05 (s, 3 H), 0.04 (s, 3 H) ppm.

$^{13}\text{C}$  NMR (100 MHz,  $\text{CDCl}_3$ )  $\delta$  142.2, 128.8, 128.4, 125.8, 81.1, 74.5, 73.9, 70.1, 68.7, 41.6, 41.0, 37.6, 31.7, 26.0, 18.2, -4.4 ppm.

IR (NaCl, film):  $\tilde{\nu}$  ( $\text{cm}^{-1}$ ) = 3312, 3026, 2951, 2930, 2856, 1477, 1460, 1377, 1254, 1155, 1130, 1088, 1069, 868, 837, 775, 746, 700, 669, 625.

HRMS (ESI+)  $\text{C}_{22}\text{H}_{34}\text{O}_2\text{Si}$  (358.60):  $m/z$   $[\text{M}+\text{Na}]^+$  calcd. for  $\text{C}_{22}\text{H}_{34}\text{O}_2\text{SiNa}$ : 381.2220; found: 381.2220.

## 2.19 *rel*-Methyl 2-([2*S*,4*R*,6*S*]-6-allyl-4-hydroxytetrahydro-2*H*-pyran-2-yl)acetate (**8d**).

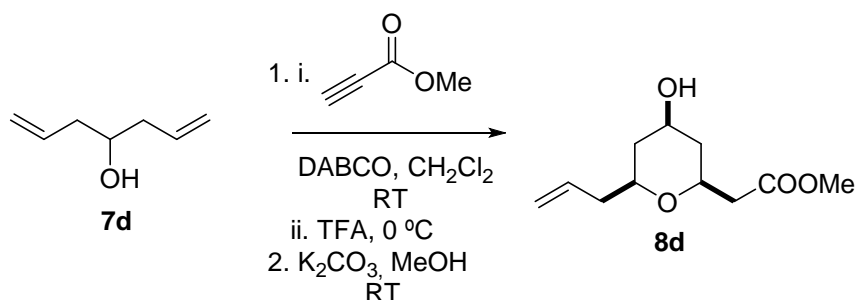

Alcohol **7d**<sup>5</sup> (870.0 mg, 7.76 mmol, 1.00 eq.) was dissolved in  $\text{CH}_2\text{Cl}_2$  (15 mL) under  $\text{N}_2$  atmosphere and DABCO (43.5 mg, 0.39 mmol, 0.05 eq.) was added. Methyl propiolate (717.3 g, 0.76 mL, 8.53 mmol, 1.10 eq.) was added dropwise as a solution in  $\text{CH}_2\text{Cl}_2$  (10 mL) and the solution was stirred at RT for 1 hour. After completion by TLC, the solution was cooled down to  $0^\circ\text{C}$ , and TFA (8.85 g, 5.78 mL, 77.56 mmol, 10.00 eq.) was added dropwise. After completion by TLC,  $\text{NaHCO}_3$  sat. (35 mL) was added. The phases were separated and the aqueous phase was extracted with  $\text{CH}_2\text{Cl}_2$  ( $3 \times 25$  mL). The combined organic phases were dried over anhydrous  $\text{Na}_2\text{SO}_4$ , and concentrated under reduced pressure. Under  $\text{N}_2$  atmosphere, the crude reaction was dissolved in dry MeOH (6 mL) and dry  $\text{K}_2\text{CO}_3$  (2.15 g, 15.52 mmol, 2.00 eq.) was added at RT. After completion by TLC,  $\text{H}_2\text{O}$  (25 mL) was added and the aqueous phase was extracted with  $\text{CH}_2\text{Cl}_2$  ( $3 \times 25$  mL). The combined organic phases were dried over anhydrous  $\text{Na}_2\text{SO}_4$ , and concentrated under reduced pressure. The crude reaction mixture was purified by column chromatography ( $\text{SiO}_2$ , EtOAc:PE 60:40) to obtain compounds **8d** (racemate) (758.2 mg, 3.54 mmol, 46 %, three steps) as a colorless oil.

**TLC:**  $R_f = 0.51$  (EtOAc:PE = 70:30).

**<sup>1</sup>H NMR** (400 MHz, CDCl<sub>3</sub>) δ 5.79 (dddd, 1 H, *J* = 17.3, 10.2, 7.4, 6.4 Hz), 5.10-5.02 (m, 2 H), 3.86-3.74 (m, 2 H), 3.69 (s, 3 H), 3.38 (dddd, 1 H, *J* = 11.2, 6.5, 6.5, 1.9 Hz), 2.61 (dd, 1 H, *J* = 15.2, 7.8 Hz), 2.43 (dd, 1 H, *J* = 15.2, 5.5 Hz), 2.34 (m<sub>c</sub>, 1 H), 2.19 (m<sub>c</sub>, 1 H), 2.03-1.94 (m, 2 H), 1.24-1.11 (m, 2 H) ppm.

**<sup>13</sup>C NMR** (100 MHz, CDCl<sub>3</sub>) δ 171.7, 134.5, 117.0, 75.3, 72.2, 67.9, 51.8, 41.0, 40.7, 40.4, 40.3 ppm.

**IR** (NaCl, film):  $\tilde{\nu}$  (cm<sup>-1</sup>) = 3404, 2947, 2920, 2853, 1734, 1641, 1437, 1375, 1333, 1314, 1271, 1196, 1144, 1084, 1032, 1001, 916, 577.

**HRMS** (ESI+) C<sub>11</sub>H<sub>18</sub>O<sub>4</sub> (214.26): *m/z* [M+Na]<sup>+</sup> calcd. for C<sub>11</sub>H<sub>18</sub>O<sub>4</sub>Na: 237.1097; found: 237.1080.

**2.20 *rel*-Methyl 2-([2*S*,4*R*,6*S*]-6-allyl-4-[(*tert*-butyldimethylsilyl)oxy]tetrahydro-2*H*-pyran-2-yl)acetate (9d).**

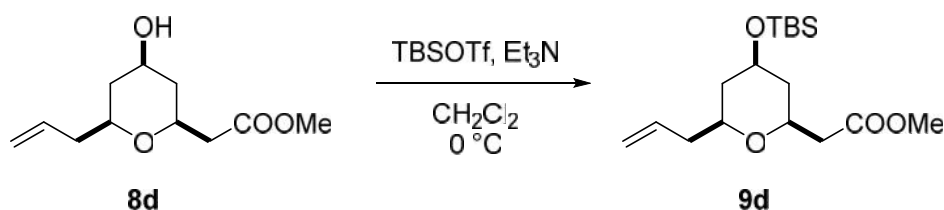

Alcohols **8d** (760.0 mg, 3.55 mmol, 1.00 eq.) was dissolved in CH<sub>2</sub>Cl<sub>2</sub> (15 mL) under N<sub>2</sub> atmosphere and Et<sub>3</sub>N (717.9 mg, 0.99 mL, 7.09 mmol, 2.00 eq.) was added. The solution was cooled down to 0 °C and TBSOTf (1.41 g, 1.22 mL, 5.32 mmol, 1.50 eq.) was added dropwise. After 10 minutes at this temperature, the solution was stirred at RT for 1 hour. After completion by TLC, brine (25 mL) was added and the aqueous phase was extracted with CH<sub>2</sub>Cl<sub>2</sub> (3 × 25 mL). The combined organic phases were dried over anhydrous Na<sub>2</sub>SO<sub>4</sub>, and concentrated under reduced pressure. The crude reaction mixture was purified by column chromatography (SiO<sub>2</sub>, EtOAc:PE 10:90) to obtain compounds **9d** (racemate) (951.9 mg, 2.90 mmol, 82 %) as a colorless oil.

**TLC:** *R*<sub>f</sub> = 0.77 (EtOAc:PE = 40:60).

**<sup>1</sup>H NMR** (400 MHz, CDCl<sub>3</sub>) δ 5.79 (dddd, 1 H, *J* = 17.2, 10.2, 7.2, 6.6 Hz), 5.09-5.00 (m, 2 H), 3.82-3.72 (m, 2 H), 3.68 (s, 3 H), 3.35 (dddd, 1 H, *J* = 11.4, 8.6, 6.0, 1.8 Hz), 2.59 (dd, 1 H, *J* = 15.2, 8.0 Hz), 2.41 (dd, 1 H, *J* = 15.2, 5.3 Hz), 2.32 (m<sub>c</sub>, 1 H), 2.16 (m<sub>c</sub>, 1 H), 1.89-1.78 (m, 2 H), 1.27-1.15 (m, 2 H), 0.88 (m, 9 H), 0.06 (s, 6 H) ppm.

**<sup>13</sup>C NMR** (100 MHz, CDCl<sub>3</sub>) δ 171.9, 134.8, 116.8, 75.4, 72.3, 68.6, 51.8, 41.3, 41.1, 41.0, 40.4, 26.0, 18.2, -4.4, -4.4 ppm.

**IR** (NaCl, film):  $\tilde{\nu}$  (cm<sup>-1</sup>) = 2953, 2930, 2857, 2886, 1744, 1437, 1375, 1254, 1196, 1150, 1130, 1072, 1005, 854, 837, 775.

**HRMS** (ESI+) **C<sub>17</sub>H<sub>32</sub>O<sub>4</sub>Si** (328.52):  $m/z$  [M+Na]<sup>+</sup> calcd. for C<sub>17</sub>H<sub>32</sub>O<sub>4</sub>SiNa: 351.1962; found: 351.1970.

**2.21** *rel*-2-([2*R*,4*R*,6*S*]-6-Allyl-4-[(*tert*-butyldimethylsilyl)oxy]tetrahydro-2*H*-pyran-2-yl)ethan-1-ol and enantiomer (**10d**).

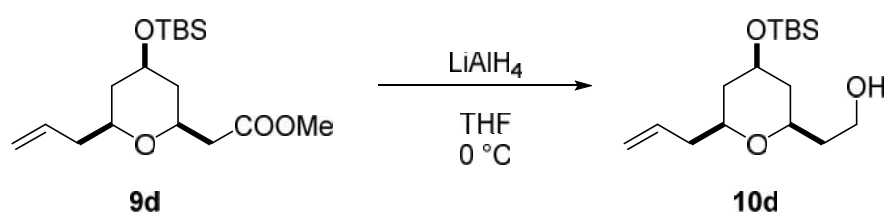

Under N<sub>2</sub> atmosphere, esters **9d** (987.2 mg, 3.00 mmol, 1.00 eq.) was dissolved in THF (40 mL). The solution was cooled down to 0 °C and LiAlH<sub>4</sub> (1.0 M in THF, 6.00 mL, 6.00 mmol, 2.00 eq.) was added dropwise. After 10 minutes the solution was stirred at RT for 1 hour. After completion by TLC, EtOH was dropped until no more H<sub>2</sub> is produced, sodium potassium tartrate sat. (40 mL) was added and stirred for 10 minutes. The aqueous phase was extracted with CH<sub>2</sub>Cl<sub>2</sub> (3 × 40 mL). The combined organic phases were dried over anhydrous Na<sub>2</sub>SO<sub>4</sub>, and concentrated under reduced pressure to obtain compounds **10d** (racemate) (812.4 mg, 2.70 mmol, 90 %) as a colorless oil.

**TLC:**  $R_f$  = 0.61 (EtOAc:PE = 40:60).

**<sup>1</sup>H NMR** (400 MHz, CDCl<sub>3</sub>) δ 5.76 (dddd, 1 H,  $J$  = 17.2, 10.2, 7.0, 7.0 Hz), 5.07-5.02 (m, 2 H), 3.76-3.69 (m, 3 H), 3.51 (m<sub>c</sub>, 1 H), 3.35 (m<sub>c</sub>, 1 H), 2.97 (br s, 1 H), 2.27-2.15 (m, 2 H), 1.80-1.60 (m, 4 H), 1.33-1.15 (m, 2 H), 0.84 (s, 9 H), 0.02 (s, 6 H) ppm.

**<sup>13</sup>C NMR** (100 MHz, CDCl<sub>3</sub>) δ 134.7, 117.4, 76.8, 75.3, 68.5, 61.9, 41.7, 41.2, 40.6, 37.7, 25.9, 18.2, -4.4, -4.5 ppm.

**IR** (NaCl, film):  $\tilde{\nu}$  (cm<sup>-1</sup>) = 3421, 3078, 2949, 2929, 2886, 2857, 1641, 1464, 1375, 1361, 1352, 1329, 1254, 1152, 1124, 1076, 1005, 964, 914, 837, 775, 669.

**HRMS** (ESI+) **C<sub>16</sub>H<sub>32</sub>O<sub>3</sub>Si** (300.51):  $m/z$  [M+Na]<sup>+</sup> calcd. for C<sub>16</sub>H<sub>32</sub>O<sub>3</sub>SiNa: 323.2013; found: 323.2020.

**2.22** *rel*-2-([2*S*,4*R*,6*S*]-6-Allyl-4-[(*tert*-butyldimethylsilyl)oxy]tetrahydro-2*H*-pyran-2-yl)acetaldehyde (**11d**).

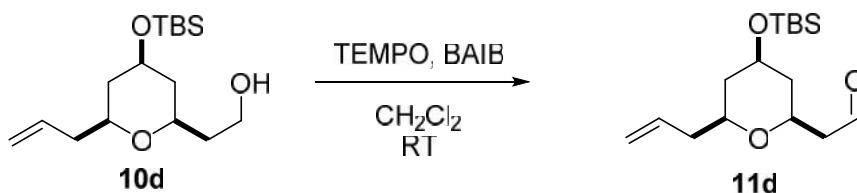

Alcohols **10d** (100.0 mg, 0.33 mmol, 1.00 eq.) was dissolved in CH<sub>2</sub>Cl<sub>2</sub> (1 mL) and TEMPO (5.2 mg, 0.03 mmol, 0.10 eq.) was added followed by BAIB (117.9 mg, 0.37 mmol, 1.10 eq.) and the solution stirred for 3 h at RT. After completion by TLC, the reaction was diluted with CH<sub>2</sub>Cl<sub>2</sub> (5 mL) and washed with sodium thiosulfate sat. (1 mL). The aqueous layer was washed with CH<sub>2</sub>Cl<sub>2</sub> (3 x 1 mL) and the combined organic phases were washed with NaHCO<sub>3</sub> sat. (1 mL) and brine (3 mL). Both aqueous layers were washed with CH<sub>2</sub>Cl<sub>2</sub> (5 mL) and the combined organic phases were dried over anhydrous Na<sub>2</sub>SO<sub>4</sub>, and concentrated under reduced pressure. The crude reaction mixture was purified by column chromatography (SiO<sub>2</sub>, EtOAc:PE 15:85) to obtain compounds **11d** (racemate) (62.0 mg, 0.21 mmol, 62 %) as a colorless oil.

**TLC:** *R*<sub>f</sub> = 0.71 (EtOAc:PE = 20:80).

**<sup>1</sup>H NMR** (400 MHz, CDCl<sub>3</sub>) δ 9.77 (dd, 1 H, *J* = 2.5, 1.9 Hz), 5.78 (dddd, 1 H, *J* = 17.1, 10.2, 7.0, 7.0 Hz), 5.08-5.00 (m, 2 H), 3.86-3.73 (m, 2 H), 3.36 (m<sub>c</sub>, 1 H), 2.62 (ddd, 1 H, *J* = 16.4, 8.0, 2.5 Hz), 2.45 (ddd, 1 H, *J* = 16.4, 4.5, 1.9 Hz), 2.29 (m<sub>c</sub>, 1 H), 2.16 (m<sub>c</sub>, 1 H), 1.85-1.79 (m, 2 H), 1.30-1.15 (m, 2 H), 0.87 (s, 9 H), 0.05 (s, 6 H) ppm.

**<sup>13</sup>C NMR** (100 MHz, CDCl<sub>3</sub>) δ 201.3, 134.6, 117.0, 75.5, 70.9, 68.5, 49.6, 41.4, 41.0, 40.4, 25.9, 18.2, -4.4, -4.5 ppm.

**IR** (NaCl, film):  $\tilde{\nu}$  (cm<sup>-1</sup>) = 2953, 2930, 2886, 2857, 1728, 1389, 1375, 1254, 1125, 1074, 916, 866, 837, 775.

**HRMS** (ESI+) C<sub>16</sub>H<sub>30</sub>O<sub>3</sub>Si (298.50): *m/z* [M+Na]<sup>+</sup> calcd. for C<sub>16</sub>H<sub>30</sub>O<sub>3</sub>SiNa: 321.1856; found: 321.1872.

**2.23** *rel*-([{2*S*,4*R*,6*R*}-2-Allyl-6-{prop-2-yn-1-yl}tetrahydro-2*H*-pyran-4-yl]oxy)(*tert*-butyl)dimethylsilane and enantiomer (**12d**).

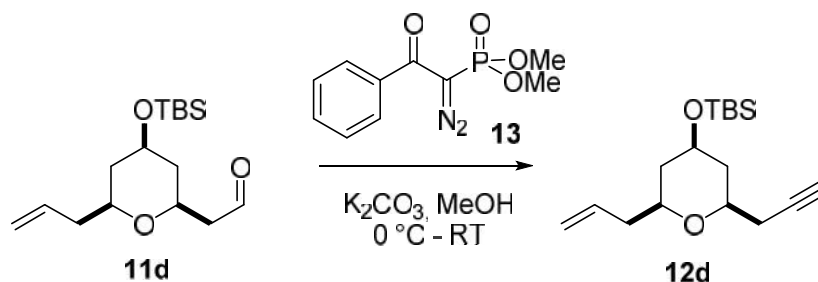

Aldehydes **11d** (62.0 mg, 0.21 mmol, 1.00 eq.) was dissolved in MeOH (2 mL) under N<sub>2</sub> atmosphere and K<sub>2</sub>CO<sub>3</sub> (114.8 mg, 0.83 mmol, 4.00 eq) was added. The reaction was cooled down to 0 °C and the diazo compound **13** (73.9 mg, 0.29 mmol, 1.40 eq.) was added as a solution in MeOH (2 mL). After 10 minutes the solution was allowed to reach room temperature and stirred overnight. After completion by TLC, brine (25 mL) was added and the aqueous phase was extracted with EtOAc (3 × 25 mL). The combined organic phases were dried over anhydrous Na<sub>2</sub>SO<sub>4</sub>, and concentrated under reduced pressure. The crude reaction mixture was purified by column chromatography (SiO<sub>2</sub>, EtOAc:PE 5:95) to obtain compounds **12d** (racemate) (51.6 mg, 0.18 mmol, 84 %) as a colorless oil.

**TLC:** *R*<sub>f</sub> = 0.73 (EtOAc:PE = 10:90).

**<sup>1</sup>H NMR** (400 MHz, CDCl<sub>3</sub>) δ 5.83 (dddd, 1 H, *J* = 17.1, 10.1, 6.9, 6.9 Hz), 5.10-5.03 (m, 2 H), 3.76 (dddd, 1 H, *J* = 10.8, 10.8, 4.4, 4.4 Hz), 3.44 (dddd, 1 H, *J* = 11.2, 7.3, 5.7, 1.8 Hz), 3.35 (dddd, 1 H, *J* = 11.6, 6.4, 6.4, 2.0 Hz), 2.50 (ddd, 1 H, *J* = 16.6, 5.5, 2.7 Hz), 2.39-2.27 (m, 2 H), 2.19 (m, 1 H), 2.05-1.98 (m, 2 H), 1.81 (m, 1 H), 1.28-1.16 (m, 2 H), 0.88 (s, 9 H), 0.06 (s, 6 H) ppm.

**<sup>13</sup>C NMR** (100 MHz, CDCl<sub>3</sub>) δ 134.8, 117.0, 80.9, 75.5, 74.0, 70.1, 68.7, 41.0, 40.8, 40.5, 26.0, 25.9, 18.2, -4.4 ppm.

**IR** (NaCl, film):  $\tilde{\nu}$  (cm<sup>-1</sup>) = 3314, 2953, 2930, 2886, 2857, 1464, 1383, 1256, 1153, 1126, 1088, 1069, 1005, 916, 870, 837, 775, 638.

**HRMS** (ESI<sup>+</sup>) **C**<sub>17</sub>**H**<sub>30</sub>**O**<sub>2</sub>**Si** (294.51): *m/z* [M+Na]<sup>+</sup> calcd. for C<sub>17</sub>H<sub>30</sub>O<sub>2</sub>SiNa: 317.1913; found: 317.1934.

**2.24** *rel*-Methyl 2-([4-([2*R*,4*R*,6*S*]-4-[[*tert*-butyldimethylsilyl]oxy]-6-propyltetrahydro-2*H*-pyran-2-yl)methyl)-1*H*-1,2,3-triazol-1-yl)methyl)oxazole-4-carboxylate (**14a**).

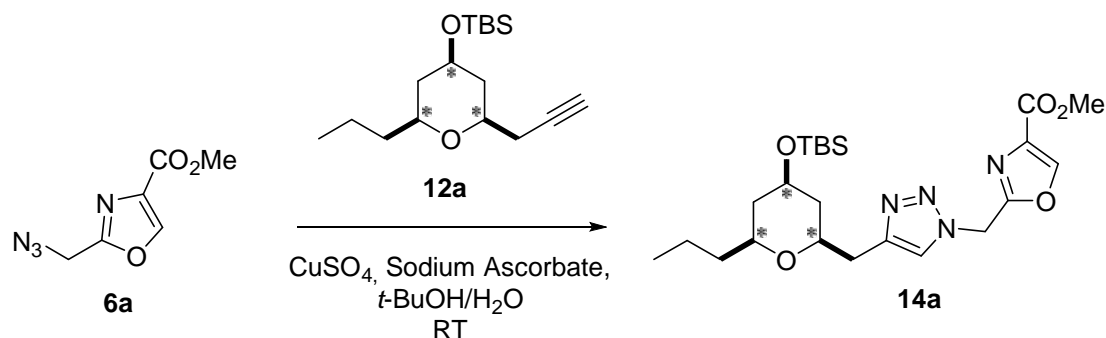

Azide **6a** (8.0 mg, 43.9  $\mu\text{mol}$ , 1.00 eq.) and ethynyl **12a** (13.0 mg, 43.8  $\mu\text{mol}$ , 1.00 eq.) were dispersed in *t*-BuOH (0.5 mL) and H<sub>2</sub>O (0.5 mL). CuSO<sub>4</sub>•5H<sub>2</sub>O (0.2 mg, 0.8  $\mu\text{mol}$ , 0.02 eq.) and sodium ascorbate (1.7 mg, 8.6  $\mu\text{mol}$ , 0.20 eq.) were added and the mixture was stirred overnight at RT. After completion by TLC, brine (10 mL) was added and the aqueous phase was extracted with CH<sub>2</sub>Cl<sub>2</sub> (3  $\times$  10 mL). The combined organic phases were dried over anhydrous Na<sub>2</sub>SO<sub>4</sub>, and concentrated under reduced pressure. The crude reaction mixture was purified by column chromatography (SiO<sub>2</sub>, EtOAc:PE 60:40) to obtain compounds **14a** (racemate) (10.9 mg, 22.7  $\mu\text{mol}$ , 52 %) as a colorless oil.

**TLC:**  $R_f$  = 0.29 (EtOAc:PE = 40:60).

**<sup>1</sup>H NMR** (400 MHz, CDCl<sub>3</sub>)  $\delta$  8.23 (s, 1 H), 7.55 (s, 1 H), 5.69 (s, 2 H), 3.93 (s, 3 H), 3.65 (m, 1 H), 3.52 (dddd, 1 H,  $J$  = 12.1, 9.1, 5.1, 2.0 Hz), 3.22 (dddd, 1 H,  $J$  = 11.6, 7.8, 4.0, 1.8 Hz), 2.95-2.83 (m, 2 H), 1.84 (dddd, 1 H,  $J$  = 12.4, 6.1, 1.5, 1.5 Hz), 1.77 (dddd, 1 H,  $J$  = 12.4, 6.1, 1.5, 1.5 Hz), 1.54-1.13 (m, 6 H), 0.87 (s, 9 H), 0.85 (t, 3 H,  $J$  = 7.1 Hz), 0.04 (s, 3 H), 0.03 (s, 3 H) ppm.

**<sup>13</sup>C NMR** (100 MHz, CDCl<sub>3</sub>)  $\delta$  160.0, 158.1, 146.2, 145.3, 134.0, 122.7, 75.5, 74.5, 68.8, 52.6, 46.3, 41.7, 41.4, 38.3, 32.7, 26.0, 19.0, 18.2, 14.1, -4.4 ppm.

**IR** (NaCl, film):  $\tilde{\nu}$  (cm<sup>-1</sup>) = 3147, 2954, 2931, 2858, 1743, 1585, 1462, 1438, 1377, 1346, 1323, 1249, 1230, 1195, 1145, 1114, 1076, 1002, 972, 933, 910, 837, 806, 775, 667.

**HRMS** (ESI+) **C<sub>23</sub>H<sub>38</sub>N<sub>4</sub>O<sub>5</sub>Si** (478.67):  $m/z$  [M+H]<sup>+</sup> calcd. for C<sub>23</sub>H<sub>39</sub>N<sub>4</sub>O<sub>5</sub>Si: 479.26842; found: 479.26616.



**2.25 Methyl 2-([S]-1-[4-{([2R,4R,6S]-4-{*tert*-butyldimethylsilyl}oxy)-6-propyltetrahydro-2H-pyran-2-yl)methyl]-1H-1,2,3-triazol-1-yl]-2-phenylethyl)oxazole-4-carboxylate and methyl 2-([S]-1-[4-{([2S,4S,6R]-4-{*tert*-butyldimethylsilyl}oxy)-6-propyltetrahydro-2H-pyran-2-yl)methyl]-1H-1,2,3-triazol-1-yl]-2-phenylethyl)oxazole-4-carboxylate (**14b**).**

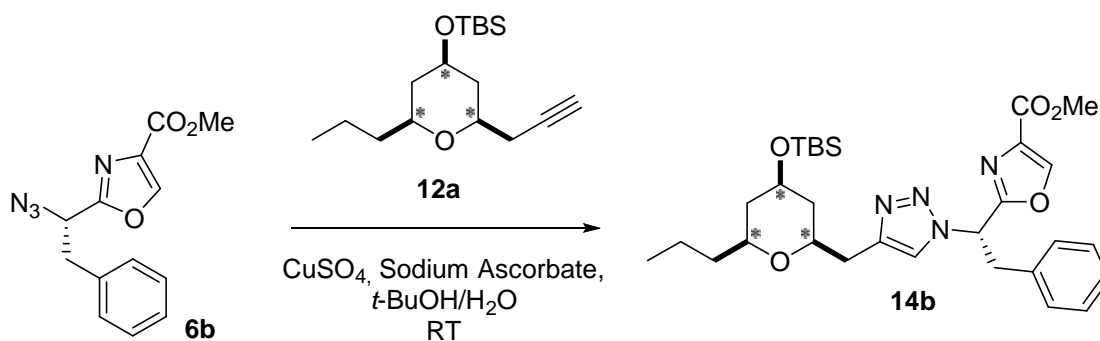

Azide **6b** (15.0 mg, 55.1  $\mu$ mol, 1.00 eq.) and ethynyl **12a** (16.2 mg, 55.1  $\mu$ mol, 1.00 eq.) were dispersed in *t*-BuOH (0.5 mL) and H<sub>2</sub>O (0.5 mL). CuSO<sub>4</sub>•5H<sub>2</sub>O (0.3 mg, 1.2  $\mu$ mol, 0.02 eq.) and sodium ascorbate (2.2 mg, 11.0  $\mu$ mol, 0.20 eq.) were added and the mixture was stirred overnight at RT. After completion by TLC, brine (10 mL) was added and the aqueous phase was extracted with CH<sub>2</sub>Cl<sub>2</sub> (3  $\times$  10 mL). The combined organic phases were dried over anhydrous Na<sub>2</sub>SO<sub>4</sub>, and concentrated under reduced pressure. The crude reaction mixture was purified by column chromatography (SiO<sub>2</sub>, EtOAc:PE 30:70) to obtain compounds **14b** (diastomeric mixture) (24.5 mg, 43.1  $\mu$ mol, 78 %) as a colorless oil.

**TLC:** *R*<sub>f</sub> = 0.40 (EtOAc:PE = 40:60).

**<sup>1</sup>H NMR** (400 MHz, CDCl<sub>3</sub>)  $\delta$  8.19 (s, 2 H), 7.52 (s, 1 H), 7.50 (s, 1 H), 7.26-7.19 (m, 6 H), 7.06-7.04 (m, 4 H), 6.09-6.01 (m, 2 H), 3.93 (s, 6 H), 3.80-3.67 (m, 6 H), 3.53-3.44 (m, 2 H), 3.25-3.18 (m, 2 H), 2.90-2.81 (m, 4 H), 1.83-1.75 (m, 6 H), 1.52-1.10 (m, 12 H), 0.88-0.83 (m, 24 H), 0.04 (s, 12 H) ppm.

**<sup>13</sup>C NMR** (100 MHz, CDCl<sub>3</sub>)  $\delta$  161.1, 160.7, 160.6, 145.5, 145.0, 134.8, 134.7, 133.8, 133.7, 129.0, 128.9, 127.7, 127.6, 122.0, 121.7, 75.4, 74.6, 74.5, 68.8, 59.5, 59.4, 52.5, 41.8, 41.7, 41.3, 41.2, 39.7, 38.3, 32.7, 32.6, 25.9, 19.0, 18.9, 18.2, 14.2, 14.1, -4.4, -4.5 ppm.

IR (NaCl, film):  $\tilde{\nu}$  (cm<sup>-1</sup>) = 3147, 2954, 2931, 2858, 1743, 1581, 1496, 1458, 1438, 1377, 1342, 1323, 1253, 1199, 1145, 1114, 1076, 1002, 933, 856, 837, 806, 775, 748, 702, 671.

HRMS (ESI+) C<sub>30</sub>H<sub>44</sub>N<sub>4</sub>O<sub>5</sub>Si (568.79):  $m/z$  [M+H]<sup>+</sup> calcd. for C<sub>30</sub>H<sub>45</sub>N<sub>4</sub>O<sub>5</sub>Si: 569.3154; found: 569.3134.

**2.26 Methyl 2-([1*S*,2*S*]-1-[4-{([2*R*,4*R*,6*S*]-4-{*tert*-butyldimethylsilyl}oxy]-6-propyltetrahydro-2*H*-pyran-2-yl)methyl}-1*H*-1,2,3-triazol-1-yl]-2-methylbutyl)oxazole-4-carboxylate and methyl 2-([1*S*,2*S*]-1-[4-{([2*S*,4*S*,6*R*]-4-{*tert*-butyldimethylsilyl}oxy]-6-propyltetrahydro-2*H*-pyran-2-yl)methyl}-1*H*-1,2,3-triazol-1-yl]-2-methylbutyl)oxazole-4-carboxylate (**14c**).**

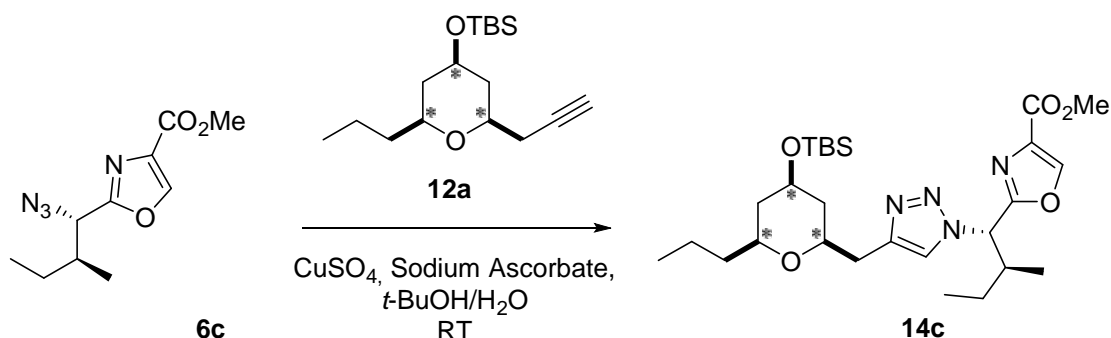

Azide **6c** (10.0 mg, 42.0  $\mu$ mol, 1.00 eq.) and ethynyl **12a** (12.4 mg, 42.0  $\mu$ mol, 1.00 eq.) were dispersed in *t*-BuOH (0.5 mL) and H<sub>2</sub>O (0.5 mL). CuSO<sub>4</sub>•5H<sub>2</sub>O (0.2 mg, 0.8  $\mu$ mol, 0.02 eq.) and sodium ascorbate (1.7 mg, 8.6  $\mu$ mol, 0.20 eq.) were added and the mixture was stirred overnight at RT. After completion by TLC, brine (10 mL) was added and the aqueous phase was extracted with CH<sub>2</sub>Cl<sub>2</sub> (3  $\times$  10 mL). The combined organic phases were dried over anhydrous Na<sub>2</sub>SO<sub>4</sub>, and concentrated under reduced pressure. The crude reaction mixture was purified by column chromatography (SiO<sub>2</sub>, EtOAc:PE 30:70) to obtain compounds **14c** (diastereomeric mixture) (18.2 mg, 34.0  $\mu$ mol, 81 %) as a colorless oil.

**TLC:**  $R_f$  = 0.51 (EtOAc:PE = 40:60).

**<sup>1</sup>H NMR** (400 MHz, CDCl<sub>3</sub>)  $\delta$  8.22 (s, 2 H), 7.68 (s, 1 H), 7.67 (s, 1 H), 5.66 (d, 2 H,  $J$  = 10.6 Hz), 3.93 (s, 6 H), 3.78-3.69 (m, 2 H), 3.58-3.49 (m, 2 H), 3.26-3.19 (m, 2 H), 2.94-2.86 (m, 4 H), 2.65-2.54 (m, 2 H), 1.86-1.74 (m, 4 H), 1.54-1.46 (m, 2 H), 1.46-1.13 (m,

12 H), 1.10-1.00 (m, 2 H), 0.93 (d, 6 H,  $J = 6.7$  Hz), 0.88-0.82 (m, 30 H), 0.03 (s, 12 H) ppm.

$^{13}\text{C}$  NMR (100 MHz,  $\text{CDCl}_3$ )  $\delta$  161.2, 161.1, 145.8, 145.7, 144.6, 133.8, 121.5, 75.5, 75.4, 74.7, 74.6, 68.9, 68.8, 62.9, 52.5, 41.9, 41.6, 41.5, 39.0, 38.9, 38.4, 38.3, 32.8, 32.7, 26.0, 25.0, 19.1, 19.0, 18.2, 15.8, 15.7, 14.2, 14.1, 10.5, 10.4, -4.4, -4.5 ppm.

IR (NaCl, film):  $\tilde{\nu}$  ( $\text{cm}^{-1}$ ) = 3151, 2954, 2931, 2858, 1747, 1728, 1581, 1465, 1442, 1381, 1323, 1253, 1230, 1195, 1149, 1114, 1076, 1045, 1002, 972, 933, 837, 775, 667.

HRMS (ESI+)  $\text{C}_{27}\text{H}_{46}\text{N}_4\text{O}_5\text{Si}$  (534.77):  $m/z$   $[\text{M}+\text{H}]^+$  calcd. for  $\text{C}_{27}\text{H}_{47}\text{N}_4\text{O}_5\text{Si}$ : 535.33102; found: 535.32836.

**2.27** *rel*-Methyl 2-([4-([2*R*,4*R*,6*S*]-4-[[*tert*-butyldimethylsilyl]oxy]-6-propyltetrahydro-2*H*-pyran-2-yl)methyl]-1*H*-1,2,3-triazol-1-yl)methylthiazole-4-carboxylate (**14d**).

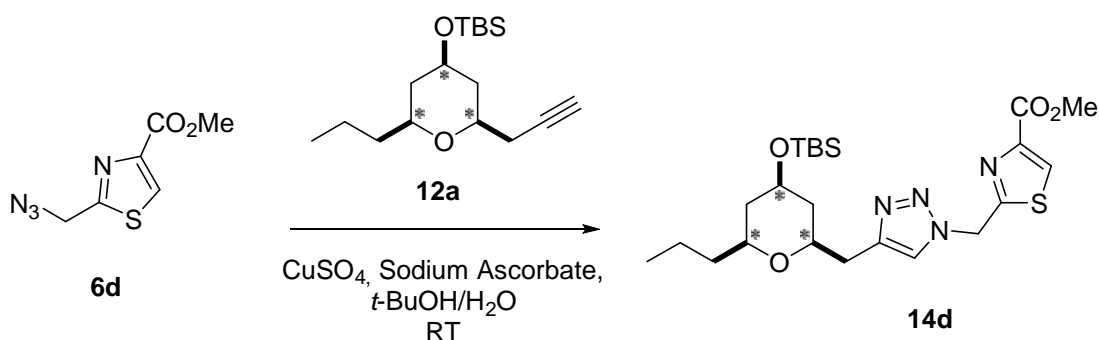

Azide **6d** (8.2 mg, 41.3  $\mu\text{mol}$ , 1.00 eq.) and ethynyl **12a** (12.2 mg, 41.3  $\mu\text{mol}$ , 1.00 eq.) were dispersed in  $t\text{-BuOH}$  (0.5 mL) and  $\text{H}_2\text{O}$  (0.5 mL).  $\text{CuSO}_4 \cdot 5\text{H}_2\text{O}$  (0.2 mg, 0.8  $\mu\text{mol}$ , 0.02 eq.) and sodium ascorbate (1.7 mg, 8.6  $\mu\text{mol}$ , 0.20 eq.) were added and the mixture was stirred overnight at RT. After completion by TLC, brine (10 mL) was added and the aqueous phase was extracted with  $\text{CH}_2\text{Cl}_2$  ( $3 \times 10$  mL). The combined organic phases were dried over anhydrous  $\text{Na}_2\text{SO}_4$ , and concentrated under reduced pressure. The crude reaction mixture was purified by column chromatography ( $\text{SiO}_2$ , EtOAc:PE 50:50) to obtain compounds **14d** (racemate) (11.2 mg, 22.6  $\mu\text{mol}$ , 55 %) as a colorless oil.

**TLC:**  $R_f = 0.32$  (EtOAc:PE = 50:50).

**<sup>1</sup>H NMR** (400 MHz, CDCl<sub>3</sub>) δ 8.21 (s, 1 H), 7.55 (s, 1 H), 5.88 (s, 2 H), 3.98 (s, 3 H), 3.74 (dddd, 1 H, *J* = 10.7, 10.7, 4.7, 4.7 Hz), 3.53 (dddd, 1 H, *J* = 12.1, 6.8, 5.4, 1.8 Hz), 3.22 (dddd, 1 H, *J* = 11.9, 7.8, 4.0, 1.8 Hz), 2.95-2.88 (m, 2 H), 1.83 (dddd, 1 H, *J* = 12.4, 6.3, 1.8, 1.8 Hz), 1.78 (dddd, 1 H, *J* = 12.6, 6.6, 1.8, 1.8 Hz), 1.53-1.12 (m, 6 H), 0.87 (s, 9 H), 0.84 (t, 3 H, *J* = 6.8 Hz), 0.04 (s, 3 H), 0.03 (s, 3 H) ppm.

**<sup>13</sup>C NMR** (100 MHz, CDCl<sub>3</sub>) δ 164.7, 161.5, 147.0, 146.2, 129.6, 122.8, 75.5, 74.5, 68.8, 52.8, 51.0, 41.7, 41.4, 38.3, 32.7, 26.0, 19.0, 18.2, 14.1, -4.4 ppm.

**IR** (NaCl, film):  $\tilde{\nu}$  (cm<sup>-1</sup>) = 3124, 2954, 2931, 2858, 1732, 1631, 1550, 1465, 1438, 1377, 1342, 1323, 1249, 1219, 1153, 1122, 1080, 999, 933, 914, 860, 837, 775, 671.

**HRMS** (ESI+) **C<sub>23</sub>H<sub>38</sub>N<sub>4</sub>O<sub>4</sub>SSi** (494.73): *m/z* [M+Na]<sup>+</sup> calcd. for C<sub>23</sub>H<sub>38</sub>N<sub>4</sub>O<sub>4</sub>SSiNa: 517.22752; found: 517.22451.

**2.28 Methyl 2-([S]-1-[4-{([2*R*,4*R*,6*S*]-4-{*tert*-butyldimethylsilyl}oxy]-6-propyltetrahydro-2*H*-pyran-2-yl)methyl]-1*H*-1,2,3-triazol-1-yl]-2-phenylethyl)thiazole-4-carboxylate and methyl 2-([S]-1-[4-{([2*S*,4*S*,6*R*]-4-{*tert*-butyldimethylsilyl}oxy]-6-propyltetrahydro-2*H*-pyran-2-yl)methyl]-1*H*-1,2,3-triazol-1-yl]-2-phenylethyl)thiazole-4-carboxylate (**14e**).**

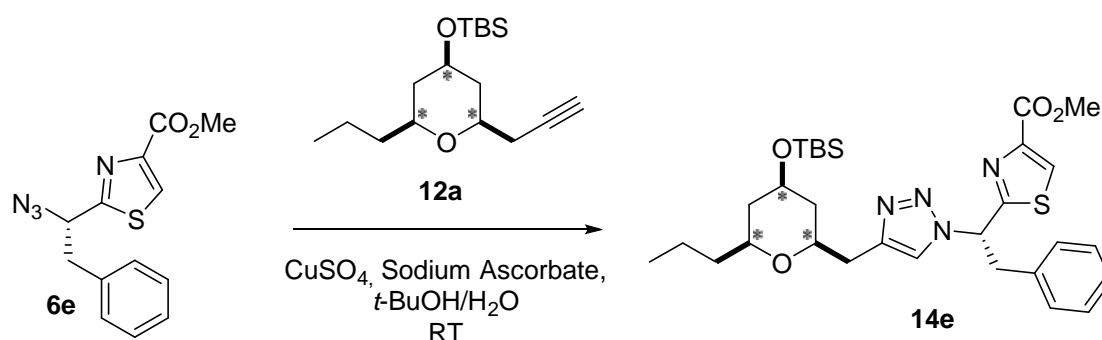

Azide **6e** (10.0 mg, 34.7 μmol, 1.00 eq.) and ethynyl **12a** (10.4 mg, 34.6 μmol, 1.00 eq.) were dispersed in *t*-BuOH (0.5 mL) and H<sub>2</sub>O (0.5 mL). CuSO<sub>4</sub>•5H<sub>2</sub>O (0.2 mg, 0.8 μmol, 0.02 eq.) and sodium ascorbate (1.7 mg, 8.0 μmol, 0.20 eq.) were added and the mixture was stirred overnight at RT. After completion by TLC, brine (10 mL) was added and the aqueous phase was extracted with CH<sub>2</sub>Cl<sub>2</sub> (3 × 10 mL). The combined organic phases were dried over anhydrous Na<sub>2</sub>SO<sub>4</sub>, and concentrated under reduced pressure. The crude reaction mixture was purified by column chromatography (SiO<sub>2</sub>, EtOAc:PE

40:60) to obtain compounds **14e** (diastomeric mixture) (16.6 mg, 28.4  $\mu$ mol, 82 %) as a colorless oil.

**TLC:**  $R_f$  = 0.59 (EtOAc:PE = 40:60).

**$^1\text{H}$  NMR** (400 MHz,  $\text{CDCl}_3$ )  $\delta$  8.19 (s, 2 H), 7.38 (s, 1 H), 7.34 (s, 1 H), 7.24-7.16 (m, 6 H), 7.06-7.03 (m, 4 H), 6.17-6.10 (m, 2 H), 3.97 (s, 6 H), 3.83-3.67 (m, 6 H), 3.48 (dddd, 1 H,  $J$  = 11.1, 6.6, 5.1, 1.6 Hz), 3.41 (dddd, 1 H,  $J$  = 11.4, 6.8, 5.3, 1.6 Hz), 3.23-3.12 (m, 2 H), 2.89-2.79 (m, 4 H), 1.81-1.70 (m, 4 H), 1.48-1.06 (m, 12 H), 0.88 (s, 9 H), 0.87 (s, 9 H), 0.83 (t, 6 H,  $J$  = 7.3 Hz), 0.04 (s, 12 H) ppm.

**$^{13}\text{C}$  NMR** (100 MHz,  $\text{CDCl}_3$ )  $\delta$  168.5, 168.4, 161.6, 146.6, 146.5, 145.3, 145.1, 135.5, 135.4, 129.5, 129.4, 129.1, 129.0, 128.9, 128.8, 127.5, 127.4, 123.1, 122.9, 75.5, 75.4, 74.6, 74.4, 68.9, 52.8, 42.5, 42.3, 41.7, 41.6, 41.3, 41.1, 38.3, 32.6, 32.5, 26.0, 19.0, 18.9, 18.2, 14.2, -4.4 ppm.

**IR** (NaCl, film):  $\tilde{\nu}$  ( $\text{cm}^{-1}$ ) = 3120, 3089, 3062, 3032, 2954, 2931, 2858, 1735, 1604, 1550, 1462, 1377, 1346, 1327, 1249, 1215, 1153, 1122, 1076, 1002, 933, 914, 860, 837, 775, 756, 702, 671, 624.

**HRMS** (ESI+)  $\text{C}_{30}\text{H}_{44}\text{N}_4\text{O}_4\text{SSi}$  (584.85):  $m/z$   $[\text{M}+\text{Na}]^+$  calcd. for  $\text{C}_{30}\text{H}_{44}\text{N}_4\text{O}_4\text{SSi}$ : 607.27447; found: 607.27225.

**2.29** *rel*-Methyl 2-([4-([2*R*,4*S*,6*R*]-4-[(*tert*-butyldimethylsilyl)oxy]-6-isopropyltetrahydro-2*H*-pyran-2-yl)methyl)-1*H*-1,2,3-triazol-1-yl)methyl)oxazole-4-carboxylate (**14f**).

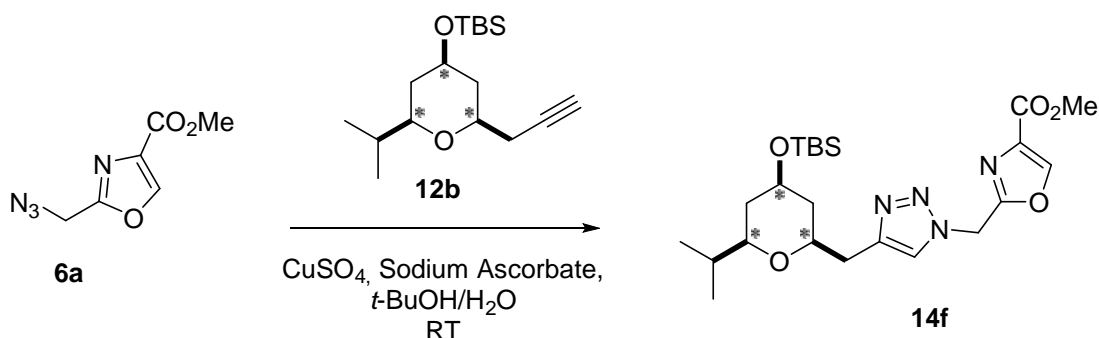

Azide **6a** (15.0 mg, 82.3  $\mu$ mol, 1.00 eq.) and ethynyl **12b** (24.3 mg, 82.1  $\mu$ mol, 1.00 eq.) were dispersed in *t*-BuOH (0.5 mL) and H<sub>2</sub>O (0.5 mL). CuSO<sub>4</sub>•5H<sub>2</sub>O (0.4 mg, 1.6  $\mu$ mol, 0.02 eq.) and sodium ascorbate (3.4 mg, 17.0  $\mu$ mol, 0.20 eq.) were added and the mixture was stirred overnight at RT. After completion by TLC, brine (15 mL) was added and the aqueous phase was extracted with CH<sub>2</sub>Cl<sub>2</sub> (3  $\times$  15 mL). The combined organic phases were dried over anhydrous Na<sub>2</sub>SO<sub>4</sub>, and concentrated under reduced pressure. The crude reaction mixture was purified by column chromatography (SiO<sub>2</sub>, EtOAc:PE 50:50) to obtain compounds **14f** (racemate) (12.5 mg, 26.1  $\mu$ mol, 32 %) as a colorless oil.

**TLC:**  $R_f$  = 0.32 (EtOAc:PE = 60:40).

**<sup>1</sup>H NMR** (400 MHz, CDCl<sub>3</sub>)  $\delta$  8.21 (s, 1 H), 7.55 (s, 1 H), 5.59 (d, 1 H,  $J$  = 2.3 Hz), 3.93 (s, 3 H), 3.73 (dddd, 1 H,  $J$  = 10.4, 10.4, 4.8, 4.8 Hz), 3.48 (m<sub>c</sub>, 1 H), 2.94-2.84 (m, 3 H), 1.85-1.75 (m, 2 H), 1.65-1.61 (m, 2 H), 1.26-1.11 (m, 2 H), 0.87 (s, 9 H), 0.84 (d, 3 H,  $J$  = 2.7 Hz), 0.83 (d, 3 H,  $J$  = 2.7 Hz), 0.05 (s, 3 H), 0.04 (s, 3 H) ppm.

**<sup>13</sup>C NMR** (100 MHz, CDCl<sub>3</sub>)  $\delta$  161.0, 158.1, 146.3, 145.3, 134.0, 122.8, 80.6, 74.4, 69.2, 52.6, 46.3, 41.4, 38.4, 33.0, 32.7, 26.0, 18.8, 18.6, 18.2, -4.3, -4.4 ppm.

**IR** (NaCl, film):  $\tilde{\nu}$  (cm<sup>-1</sup>) = 2995, 2930, 2857, 1744, 1586, 1564, 1466, 1443, 1324, 1266, 1231, 1146, 1113, 1069, 1005, 837, 809, 772, 739.

**HRMS** (ESI+) **C<sub>23</sub>H<sub>38</sub>N<sub>4</sub>O<sub>5</sub>Si** (478.67):  $m/z$  [M+H]<sup>+</sup> calcd. for C<sub>23</sub>H<sub>39</sub>N<sub>4</sub>O<sub>5</sub>Si: 479.2684; found: 479.2699.

**2.30 Methyl 2-([S]-1-[4-{([2*R*,4*S*,6*R*]-4-[[*tert*-butyldimethylsilyl]oxy]-6-isopropyltetrahydro-2*H*-pyran-2-yl)methyl]-1*H*-1,2,3-triazol-1-yl]-2-phenylethyl)oxazole-4-carboxylate and methyl 2-([S]-1-[4-{([2*S*,4*R*,6*S*]-4-[[*tert*-butyldimethylsilyl]oxy]-6-isopropyltetrahydro-2*H*-pyran-2-yl)methyl]-1*H*-1,2,3-triazol-1-yl]-2-phenylethyl)oxazole-4-carboxylate (**14g**).**

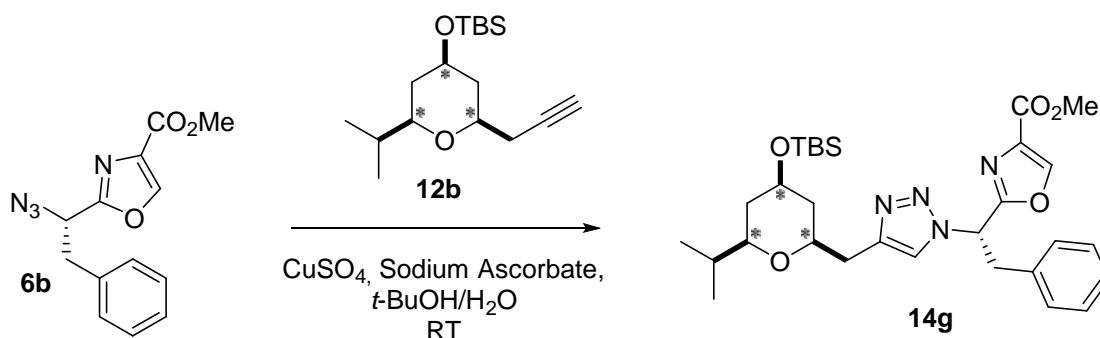

Azide **6b** (25.0 mg, 91.9  $\mu\text{mol}$ , 1.00 eq.) and ethynyl **12b** (27.2 mg, 91.7  $\mu\text{mol}$ , 1.00 eq.) were dispersed in  $t\text{-BuOH}$  (0.5 mL) and  $\text{H}_2\text{O}$  (0.5 mL).  $\text{CuSO}_4 \cdot 5\text{H}_2\text{O}$  (0.4 mg, 1.6  $\mu\text{mol}$ , 0.02 eq.) and sodium ascorbate (3.4 mg, 17.0  $\mu\text{mol}$ , 0.20 eq.) were added and the mixture was stirred overnight at RT. After completion by TLC, brine (10 mL) was added and the aqueous phase was extracted with  $\text{CH}_2\text{Cl}_2$  ( $3 \times 10$  mL). The combined organic phases were dried over anhydrous  $\text{Na}_2\text{SO}_4$ , and concentrated under reduced pressure. The crude reaction mixture was purified by column chromatography ( $\text{SiO}_2$ , EtOAc:PE 40:60) to obtain compounds **14g** (diastomeric mixture) (34.2 mg, 60.1  $\mu\text{mol}$ , 66 %) as a colorless oil.

**TLC:**  $R_f$  = 0.54 (EtOAc:PE = 40:60).

**$^1\text{H}$  NMR** (400 MHz,  $\text{CDCl}_3$ )  $\delta$  8.18 (s, 2 H), 7.54 (s, 1 H), 7.49 (s, 1 H), 7.25-7.20 (m, 6 H), 7.07- 7.05 (m, 4 H), 6.11-6.01 (m, 2 H), 3.93 (s, 3 H), 3.92 (s, 3 H), 3.81-3.66 (m, 6 H), 3.48-3.43 (m, 2 H), 2.95-2.82 (m, 6 H), 1.82-1.75 (m, 4 H), 1.65-1.59 (m, 2 H), 1.22-1.07 (m, 4 H), 0.88 (s, 18 H), 0.84-0.81 (m, 12 H), 0.05 (s, 6 H), 0.04 (s, 6 H) ppm.

**$^{13}\text{C}$  NMR** (100 MHz,  $\text{CDCl}_3$ )  $\delta$  161.1, 160.7, 145.6, 145.5, 144.9, 134.8, 134.7, 133.8, 129.0, 128.9, 127.7, 122.1, 121.7, 80.6, 74.4, 69.2, 59.5, 59.4, 52.5, 41.2, 39.8, 39.7, 38.4, 38.3, 33.0, 32.6, 26.0, 18.9, 18.8, 18.6, 18.2, -4.4, -4.5 ppm.

**IR** (NaCl, film):  $\tilde{\nu}$  ( $\text{cm}^{-1}$ ) = 2955, 2932, 2857, 1746, 1727, 1582, 1466, 1441, 1322, 1254, 1113, 1071, 1003, 837, 773, 747, 700.

HRMS (ESI+)  $\text{C}_{30}\text{H}_{44}\text{N}_4\text{O}_5\text{Si}$  (568.79):  $m/z$   $[\text{M}+\text{H}]^+$  calcd. for  $\text{C}_{30}\text{H}_{45}\text{N}_4\text{O}_5\text{Si}$ : 569.3164; found: 569.3167.

**2.31 Methyl 2-([1*S*,2*S*]-1-[4-{([2*R*,4*S*,6*R*]-4-{*tert*-butyldimethylsilyl}oxy]-6-isopropyltetrahydro-2*H*-pyran-2-yl)methyl}-1*H*-1,2,3-triazol-1-yl]-2-methylbutyl)oxazole-4-carboxylate and methyl 2-([1*S*,2*S*]-1-[4-{([2*S*,4*R*,6*S*]-4-{*tert*-butyldimethylsilyl}oxy]-6-isopropyltetrahydro-2*H*-pyran-2-yl)methyl}-1*H*-1,2,3-triazol-1-yl]-2-methylbutyl)oxazole-4-carboxylate (**14h**).**

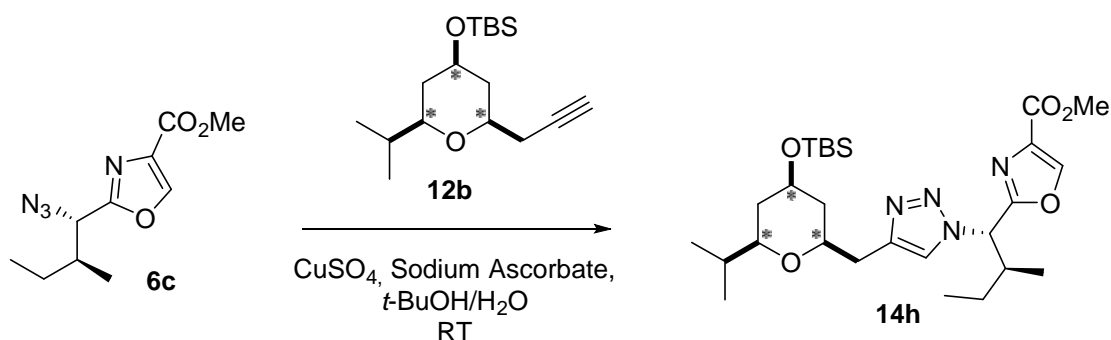

Azide **6c** (20.1 mg, 84.3  $\mu\text{mol}$ , 1.00 eq.) and ethynyl **12b** (25.0 mg, 84.3  $\mu\text{mol}$ , 1.00 eq.) were dispersed in  $t\text{-BuOH}$  (0.5 mL) and  $\text{H}_2\text{O}$  (0.5 mL).  $\text{CuSO}_4 \cdot 5\text{H}_2\text{O}$  (0.4 mg, 1.6  $\mu\text{mol}$ , 0.02 eq.) and sodium ascorbate (3.4 mg, 17.0  $\mu\text{mol}$ , 0.20 eq.) were added and the mixture was stirred overnight at RT. After completion by TLC, brine (10 mL) was added and the aqueous phase was extracted with  $\text{CH}_2\text{Cl}_2$  ( $3 \times 10$  mL). The combined organic phases were dried over anhydrous  $\text{Na}_2\text{SO}_4$ , and concentrated under reduced pressure. The crude reaction mixture was purified by column chromatography ( $\text{SiO}_2$ , EtOAc:PE 30:70) to obtain compounds **14h** (diastereomeric mixture) (43.7 mg, 81.7  $\mu\text{mol}$ , 97 %) as a colorless oil.

**TLC:**  $R_f$  = 0.24 (EtOAc:PE = 30:70).

**$^1\text{H}$  NMR** (400 MHz,  $\text{CDCl}_3$ )  $\delta$  8.22 (s, 1 H), 8.22 (s, 1 H), 7.69 (s, 2 H), 5.57 (d, 1 H,  $J$  = 10.7 Hz), 5.66 (d, 1 H,  $J$  = 10.8 Hz), 3.93 (s, 3 H), 3.93 (s, 3 H), 3.78-3.68 (m, 2 H), 3.56-3.44 (m, 2 H), 2.95-2.82 (m, 6 H), 2.65-2.54 (m, 2 H), 1.85-1.77 (m, 4 H), 1.67-1.58 (m, 2 H), 1.23-0.99 (m, 8 H), 0.93 (d, 6 H,  $J$  = 6.6 Hz), 0.87 (s, 18 H), 0.87-0.83 (m, 18 H), 0.04 (s, 12 H) ppm.



**$^{13}\text{C}$  NMR** (100 MHz,  $\text{CDCl}_3$ )  $\delta$  161.3, 161.2, 145.9, 145.8, 144.6, 133.8, 121.5, 121.5, 80.7, 80.6, 74.6, 74.5, 69.3, 69.2, 63.0, 62.9, 52.5, 52.4, 41.6, 41.5, 39.0, 39.0, 38.7, 38.6, 33.1, 32.8, 26.0, 25.1, 19.0, 18.9, 18.7, 18.2, 15.8, 15.7, 10.4, 10.4, -4.4, -4.4 ppm.

**IR** (NaCl, film):  $\tilde{\nu}$  ( $\text{cm}^{-1}$ ) = 2954, 2932, 2857, 1751, 1719, 1578, 1381, 1341, 1321, 1252, 1198, 1152, 1113, 1070, 1005, 853, 837, 775.

**HRMS** (ESI+)  $\text{C}_{27}\text{H}_{46}\text{N}_4\text{O}_5\text{Si}$  (534.77):  $m/z$   $[\text{M}+\text{H}]^+$  calcd. for  $\text{C}_{27}\text{H}_{47}\text{N}_4\text{O}_5\text{Si}$ : 535.3310; found: 535.3323;  $[\text{M}+\text{Na}]^+$  calcd. for  $\text{C}_{27}\text{H}_{46}\text{N}_4\text{O}_5\text{SiNa}$ : 557.3130; found: 557.3142.

**2.32 Methyl 2-([S]-1-[4-([2*R*,4*S*,6*R*]-4-[[*tert*-butyldimethylsilyl]oxy]-6-isopropyltetrahydro-2*H*-pyran-2-yl)methyl]-1*H*-1,2,3-triazol-1-yl]-2-phenylethyl)thiazole-4-carboxylate and methyl 2-([S]-1-[4-([2*S*,4*R*,6*S*]-4-[[*tert*-butyldimethylsilyl]oxy]-6-isopropyltetrahydro-2*H*-pyran-2-yl)methyl]-1*H*-1,2,3-triazol-1-yl]-2-phenylethyl)thiazole-4-carboxylate (**14i**).**

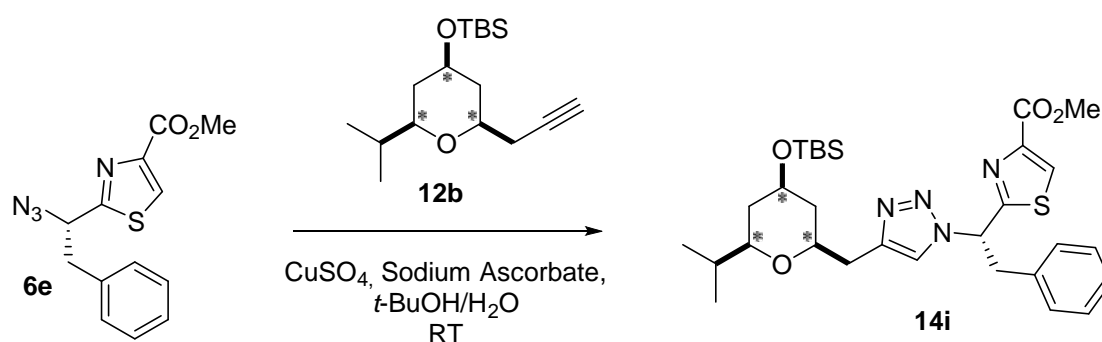

Azide **6e** (25.0 mg, 86.7  $\mu\text{mol}$ , 1.00 eq.) and ethynyl **12b** (25.7 mg, 86.6  $\mu\text{mol}$ , 1.00 eq.) were dispersed in  $t\text{-BuOH}$  (0.5 mL) and  $\text{H}_2\text{O}$  (0.5 mL).  $\text{CuSO}_4 \cdot 5\text{H}_2\text{O}$  (0.4 mg, 1.6  $\mu\text{mol}$ , 0.02 eq.) and sodium ascorbate (3.4 mg, 17.0  $\mu\text{mol}$ , 0.20 eq.) were added and the mixture was stirred overnight at RT. After completion by TLC, brine (10 mL) was added and the aqueous phase was extracted with  $\text{CH}_2\text{Cl}_2$  ( $3 \times 10$  mL). The combined organic phases were dried over anhydrous  $\text{Na}_2\text{SO}_4$ , and concentrated under reduced pressure. The crude reaction mixture was purified by column chromatography ( $\text{SiO}_2$ , EtOAc:PE 40:60) to obtain compounds **14i** (diastomeric mixture) (43.7 mg, 76.8  $\mu\text{mol}$ , 86 %) as a yellowish oil.

**TLC:**  $R_f$  = 0.27 (EtOAc:PE = 30:70).

**$^1\text{H}$  NMR** (400 MHz,  $\text{CDCl}_3$ )  $\delta$  8.19 (s, 1 H), 8.18 (s, 1 H), 7.41 (s, 1 H), 7.34 (s, 1 H), 7.23-7.16 (m, 6 H), 7.06-7.03 (m, 4 H), 6.17-6.10 (m, 2 H), 3.97 (s, 6 H), 3.79-3.68 (m, 6 H),

3.49-3.37 (m, 2 H), 2.93-2.79 (m, 6 H), 1.80-1.71 (m, 4 H), 1.63-1.55 (m, 2 H), 1.21-1.03 (m, 4 H), 0.88 (s, 9 H), 0.87 (s, 9 H), 0.81-0.77 (m, 12 H), 0.05 (s, 6 H), 0.04 (s, 6 H) ppm.

<sup>13</sup>C NMR (100 MHz, CDCl<sub>3</sub>) δ 168.4, 168.3, 161.6, 146.6, 146.5, 145.3, 145.1, 135.5, 129.4, 129.3, 129.0, 129.0, 128.9, 128.8, 127.5, 127.4, 123.1, 122.8, 80.6, 80.5, 74.5, 74.3, 69.2, 52.7, 42.4, 42.2, 41.2, 41.0, 38.3, 38.2, 32.9, 32.5, 32.4, 25.9, 18.8, 18.7, 18.6, 18.5, 18.2, -4.4 ppm.

IR (NaCl, film):  $\tilde{\nu}$  (cm<sup>-1</sup>) = 2955, 2932, 2857, 1729, 1458, 1441, 1374, 1347, 1326, 1250, 1218, 1156, 1119, 1071, 878, 838, 778, 701.

HRMS (ESI+) C<sub>30</sub>H<sub>44</sub>N<sub>4</sub>O<sub>5</sub>Si (584.85):  $m/z$  [M+H]<sup>+</sup> calcd. for C<sub>30</sub>H<sub>45</sub>N<sub>4</sub>O<sub>5</sub>Si: 585.2925; found: 585.2916; [M+Na]<sup>+</sup> calcd. for C<sub>30</sub>H<sub>44</sub>N<sub>4</sub>O<sub>5</sub>SiNa: 607.2745; found: 607.2731.

**2.33** *rel*-Methyl 2-([4-([2*R*,4*R*,6*S*]-4-[(*tert*-butyldimethylsilyl)oxy]-6-phenethyltetrahydro-2*H*-pyran-2-yl)methyl)-1*H*-1,2,3-triazol-1-yl)methyl)oxazole-4-carboxylate (**14j**).

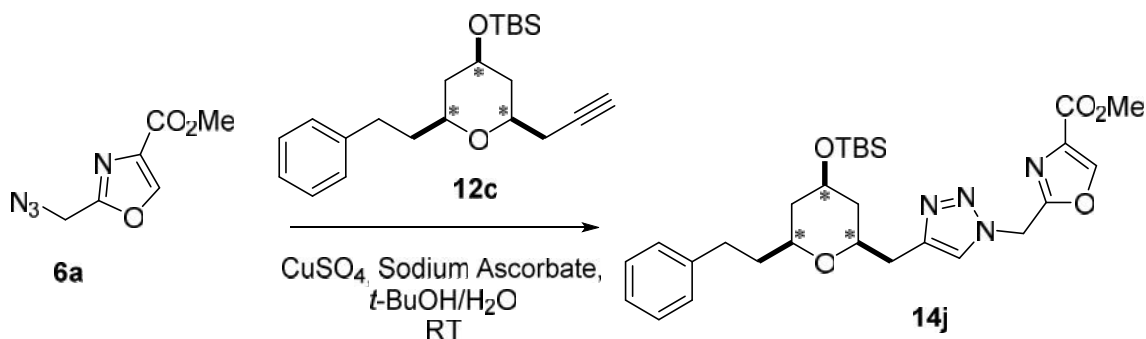

Azide **6a** (7.9 mg, 43.4  $\mu$ mol, 1.00 eq.) and ethynyl **12c** (15.6 mg, 43.4  $\mu$ mol, 1.00 eq.) were dispersed in *t*-BuOH (0.5 mL) and H<sub>2</sub>O (0.5 mL). CuSO<sub>4</sub>•5H<sub>2</sub>O (0.2 mg, 0.8  $\mu$ mol, 0.02 eq.) and sodium ascorbate (1.7 mg, 8.5  $\mu$ mol, 0.20 eq.) were added and the mixture was stirred overnight at RT. After completion by TLC, brine (15 mL) was added and the aqueous phase was extracted with CH<sub>2</sub>Cl<sub>2</sub> (3  $\times$  15 mL). The combined organic phases were dried over anhydrous Na<sub>2</sub>SO<sub>4</sub>, and concentrated under reduced pressure. The crude reaction mixture was purified by column chromatography (SiO<sub>2</sub>, EtOAc:PE 60:40) to obtain compounds **14j** (racemate) (11.6 mg, 21.4  $\mu$ mol, 49 %) as a colorless oil.

**TLC:**  $R_f$  = 0.48 (EtOAc:PE = 70:30).

**<sup>1</sup>H NMR** (400 MHz, CDCl<sub>3</sub>) δ 7.93 (s, 1 H), 7.58 (s, 1 H), 7.19 (t, 2 H, *J* = 7.2 Hz), 7.13 (t, 1 H, *J* = 7.2 Hz), 6.89 (d, 2 H, *J* = 7.2 Hz), 5.70 (d, 1 H, *J* = 15.6 Hz), 5.62 (d, 1 H, *J* = 15.6 Hz), 3.85 (s, 3 H), 3.68 (dddd, 1 H, *J* = 10.4, 10.4, 4.4, 4.4 Hz), 3.50 (m<sub>c</sub>, 1 H), 3.11 (m<sub>c</sub>, 1 H), 2.95-2.84 (m, 2 H), 2.57 (ddd, 1 H, *J* = 13.5, 8.4, 5.0 Hz), 2.47 (ddd, 1 H, *J* = 13.5, 8.3, 8.3 Hz), 1.87-1.74 (m, 2 H), 1.71-1.54 (m, 2 H), 1.28-1.14 (m, 2 H), 0.83 (s, 9 H), 0.02 (s, 6 H) ppm.

**<sup>13</sup>C NMR** (100 MHz, CDCl<sub>3</sub>) δ 160.9, 157.9, 146.2, 145.2, 142.0, 133.8, 128.6, 128.5, 125.9, 122.9, 74.6, 74.0, 68.7, 52.4, 46.3, 41.7, 41.5, 37.7, 32.7, 31.7, 26.0, 18.2, -4.4 ppm.

**IR** (NaCl, film):  $\tilde{\nu}$  (cm<sup>-1</sup>) = 3146, 3026, 2951, 2928, 2857, 1744, 1584, 1560, 1458, 1437, 1375, 1346, 1321, 1252, 1231, 1194, 1144, 1113, 1074, 1005, 868, 837, 806, 775, 702, 669.

**HRMS** (ESI+) C<sub>28</sub>H<sub>40</sub>N<sub>4</sub>O<sub>5</sub>Si (540.74): *m/z* [M+Na]<sup>+</sup> calcd. for C<sub>28</sub>H<sub>40</sub>N<sub>4</sub>O<sub>5</sub>SiNa: 563.2660; found: 563.2682.

**2.34** Methyl 2-([S]-1-[4-{{[2*R*,4*R*,6*S*]-4-{{*tert*-butyldimethylsilyl}oxy]-6-phenethyltetrahydro-2*H*-pyran-2-yl)methyl}-1*H*-1,2,3-triazol-1-yl]-2-phenylethyl)oxazole-4-carboxylate and methyl 2-([S]-1-[4-{{[2*S*,4*S*,6*R*]-4-{{*tert*-butyldimethylsilyl}oxy]-6-phenethyltetrahydro-2*H*-pyran-2-yl)methyl}-1*H*-1,2,3-triazol-1-yl]-2-phenylethyl)oxazole-4-carboxylate (**14k**).

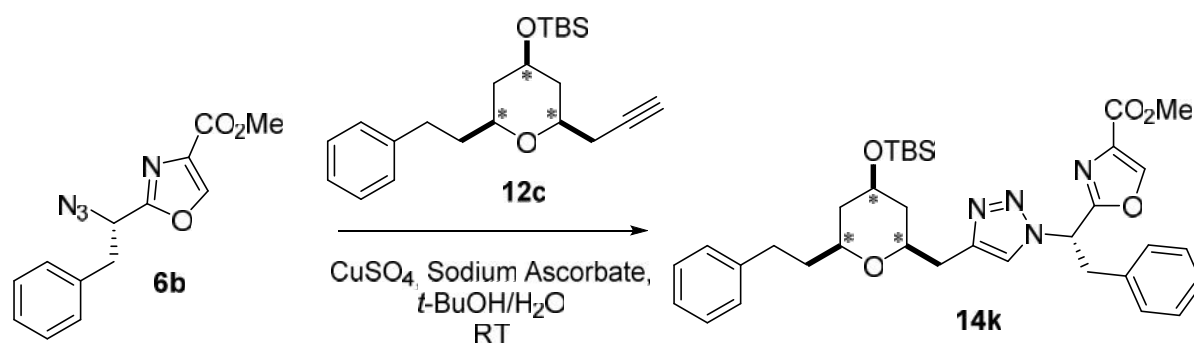

Azide **6b** (19.0 mg, 72.0 μmol, 1.00 eq.) and ethynyl **12c** (25.8 mg, 72.0 μmol, 1.00 eq.) were dispersed in *t*-BuOH (0.5 mL) and H<sub>2</sub>O (0.5 mL). CuSO<sub>4</sub>•5H<sub>2</sub>O (0.3 mg, 1.0 μmol,

0.02 eq.) and sodium ascorbate (2.8 mg, 14.1  $\mu$ mol, 0.20 eq.) were added and the mixture was stirred overnight at RT. After completion by TLC, brine (15 mL) was added and the aqueous phase was extracted with  $\text{CH}_2\text{Cl}_2$  ( $3 \times 15$  mL). The combined organic phases were dried over anhydrous  $\text{Na}_2\text{SO}_4$ , and concentrated under reduced pressure. The crude reaction mixture was purified by column chromatography ( $\text{SiO}_2$ , EtOAc:PE 30:70) to obtain compounds **14k** (diastomeric mixture) (33.0 mg, 52.3  $\mu$ mol, 73 %) as a colorless oil.

**TLC:**  $R_f$  = 0.42 (EtOAc:PE = 30:70).

**$^1\text{H}$  NMR** (400 MHz,  $\text{CDCl}_3$ )  $\delta$  8.00 (s, 1 H), 7.88 (s, 1 H), 7.62 (s, 1 H), 7.51 (s, 1 H), 7.24-7.14 (m, 12 H), 7.06-7.02 (m, 4 H), 6.97-6.96 (m, 2 H), 6.90-6.88 (m, 2 H), 6.11 (dd, 1 H,  $J$  = 8.3, 7.6 Hz), 6.00 (dd, 1 H,  $J$  = 7.9, 7.9 Hz), 3.87 (s, 3 H), 3.86 (s, 3 H), 3.79-3.63 (m, 6 H), 3.55-3.45 (m, 2 H), 3.17-3.08 (m, 2 H), 2.95-2.83 (m, 4 H), 2.66-2.44 (m, 4 H), 1.85-1.57 (m, 8 H), 1.27-1.14 (m, 4 H), 0.87 (s, 9 H), 0.86 (s, 9 H), 0.03 (s, 6 H), 0.02 (s, 6 H) ppm.

**$^{13}\text{C}$  NMR** (100 MHz,  $\text{CDCl}_3$ )  $\delta$  161.1, 161.0, 160.6, 160.5, 145.6, 145.4, 144.9, 144.8, 142.0, 141.9, 134.8, 134.6, 133.7, 133.6, 129.0, 128.9, 128.6, 128.5, 128.4, 128.4, 127.6, 125.8, 122.3, 121.6, 74.6, 74.5, 74.1, 73.9, 68.7, 68.6, 59.5, 59.3, 52.4, 52.3, 41.7, 41.4, 41.3, 39.8, 39.5, 37.7, 32.7, 32.6, 31.8, 31.7, 25.9, 18.2, -4.5 ppm.

**IR** (NaCl, film):  $\tilde{\nu}$  ( $\text{cm}^{-1}$ ) = 2951, 2930, 2857, 1738, 1722, 1582, 1497, 1456, 1439, 1377, 1344, 1323, 1254, 1198, 1113, 1076, 1003, 868, 837, 806, 775, 748, 700, 669.

**HRMS** (ESI+)  $\text{C}_{35}\text{H}_{46}\text{N}_4\text{O}_5\text{Si}$  (630.86):  $m/z$   $[\text{M}+\text{Na}]^+$  calcd. for  $\text{C}_{35}\text{H}_{46}\text{N}_4\text{O}_5\text{SiNa}$ : 653.3130; found: 653.3105.

**2.35 Methyl 2-([1S,2S]-1-[4-{([2R,4R,6S]-4-{*tert*-butyldimethylsilyl}oxy)-6-phenethyltetrahydro-2H-pyran-2-yl)methyl}-1H-1,2,3-triazol-1-yl]-2-methylbutyl)oxazole-4-carboxylate and methyl 2-([1S,2S]-1-[4-{([2S,4S,6R]-4-{*tert*-butyldimethylsilyl}oxy)-6-phenethyltetrahydro-2H-pyran-2-yl)methyl}-1H-1,2,3-triazol-1-yl]-2-methylbutyl)oxazole-4-carboxylate (**14I**).**

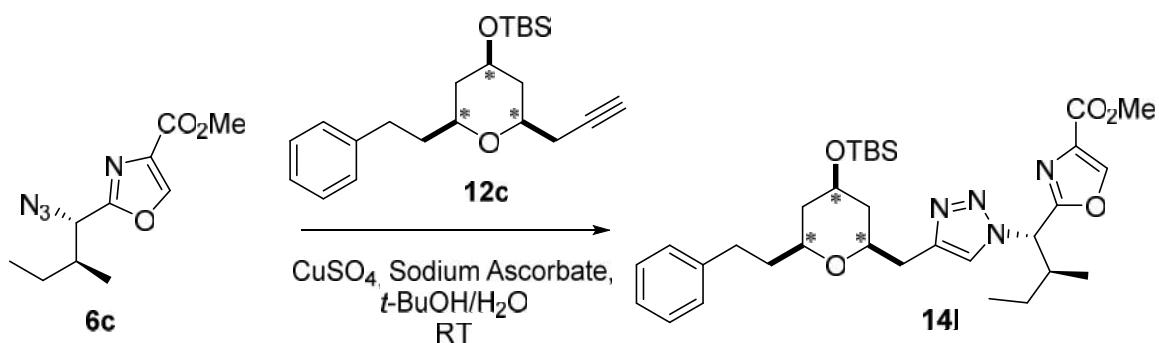

Azide **6c** (16.6 mg, 69.7  $\mu$ mol, 1.00 eq.) and ethynyl **12c** (25.0 mg, 69.7  $\mu$ mol, 1.00 eq.) were dispersed in *t*-BuOH (0.5 mL) and H<sub>2</sub>O (0.5 mL). CuSO<sub>4</sub>•5H<sub>2</sub>O (0.3 mg, 1.0  $\mu$ mol, 0.02 eq.) and sodium ascorbate (2.8 mg, 14.1  $\mu$ mol, 0.20 eq.) were added and the mixture was stirred overnight at RT. After completion by TLC, brine (15 mL) was added and the aqueous phase was extracted with CH<sub>2</sub>Cl<sub>2</sub> (3  $\times$  15 mL). The combined organic phases were dried over anhydrous Na<sub>2</sub>SO<sub>4</sub>, and concentrated under reduced pressure. The crude reaction mixture was purified by column chromatography (SiO<sub>2</sub>, EtOAc:PE 30:70) to obtain compounds **14I** (diastomeric mixture) (35.3 mg, 59.1  $\mu$ mol, 85 %) as a colorless oil.

**TLC:** *R*<sub>f</sub> = 0.32 (EtOAc:PE = 30:70).

**<sup>1</sup>H NMR** (400 MHz, CDCl<sub>3</sub>)  $\delta$  8.09 (s, 1 H), 7.86 (s, 1 H), 7.77 (s, 1 H), 7.73 (s, 1 H), 7.25-7.11 (m, 6 H), 7.00-6.98 (m, 2 H), 6.83-6.81 (m, 2 H), 5.67 (d, 1 H, *J* = 10.8 Hz), 5.65 (d, 1 H, *J* = 10.6 Hz), 3.88 (s, 3 H), 3.85 (s, 3 H), 3.76-3.65 (m, 2 H), 3.60 (m<sub>c</sub>, 1 H), 3.50 (m<sub>c</sub>, 1 H), 3.18 (m<sub>c</sub>, 1 H), 3.09 (m<sub>c</sub>, 1 H), 2.96-2.87 (m, 4 H), 2.68-2.43 (m, 6 H), 1.87-1.52 (m, 8 H), 1.30-1.14 (m, 6 H), 1.09-1.01 (m, 2 H), 0.91 (d, 3 H, *J* = 6.7 Hz), 0.90 (d, 3 H, *J* = 6.7 Hz), 0.86 (s, 9 H), 0.85 (s, 9 H), 0.82 (t, 3 H, *J* = 7.5 Hz), 0.79 (t, 3 H, *J* = 7.3 Hz), 0.02 (s, 6 H), 0.01 (s, 6 H) ppm.

**<sup>13</sup>C NMR** (100 MHz, CDCl<sub>3</sub>)  $\delta$  161.1, 161.1, 161.0, 160.9, 145.9, 145.7, 144.6, 144.5, 142.0, 141.8, 133.6, 133.5, 128.6, 128.5, 128.4, 128.4, 125.8, 125.8, 121.8, 121.5, 74.8,

74.6, 74.2, 73.6, 68.7, 68.6, 62.9, 62.8, 52.4, 52.3, 41.8, 41.7, 41.6, 39.0, 38.8, 37.9, 37.7, 32.8, 32.7, 31.9, 31.6, 25.9, 25.1, 25.0, 18.2, 15.7, 15.6, 10.4, 10.3, -4.4, -4.5 ppm.

IR (NaCl, film):  $\tilde{\nu}$  (cm<sup>-1</sup>) = 2951, 2934, 2857, 1751, 1578, 1458, 1437, 1375, 1340, 1321, 1252, 1229, 1198, 1148, 1111, 1074, 1042, 1005, 932, 868, 837, 775, 702, 669.

HRMS (ESI+) C<sub>32</sub>H<sub>48</sub>N<sub>4</sub>O<sub>5</sub>Si (596.84):  $m/z$  [M+Na]<sup>+</sup> calcd. for C<sub>32</sub>H<sub>48</sub>N<sub>4</sub>O<sub>5</sub>SiNa: 619.3286; found: 619.3275.

**2.36**            **Methyl**            **2-([S]-1-[4-{([2R,4R,6S]-4-[(*tert*-butyldimethylsilyl)oxy]-6-phenethyltetrahydro-2H-pyran-2-yl)methyl]-1H-1,2,3-triazol-1-yl]-2-phenylethyl)thiazole-4-carboxylate and methyl 2-([S]-1-[4-{([2S,4S,6R]-4-[(*tert*-butyldimethylsilyl)oxy]-6-phenethyltetrahydro-2H-pyran-2-yl)methyl]-1H-1,2,3-triazol-1-yl]-2-phenylethyl)thiazole-4-carboxylate (**14m**).**

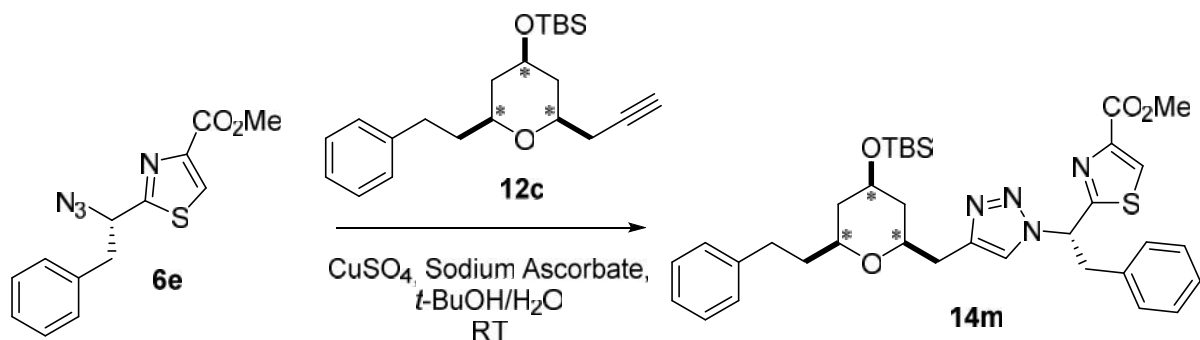

Azide **6e** (20.1 mg, 69.7  $\mu$ mol, 1.00 eq.) and ethynyl **12c** (25.0 mg, 69.7  $\mu$ mol, 1.00 eq.) were dispersed in *t*-BuOH (0.5 mL) and H<sub>2</sub>O (0.5 mL). CuSO<sub>4</sub>•5H<sub>2</sub>O (0.3 mg, 1.0  $\mu$ mol, 0.02 eq.) and sodium ascorbate (2.8 mg, 14.1  $\mu$ mol, 0.20 eq.) were added and the mixture was stirred overnight at RT. After completion by TLC, brine (15 mL) was added and the aqueous phase was extracted with CH<sub>2</sub>Cl<sub>2</sub> (3  $\times$  15 mL). The combined organic phases were dried over anhydrous Na<sub>2</sub>SO<sub>4</sub>, and concentrated under reduced pressure. The crude reaction mixture was purified by column chromatography (SiO<sub>2</sub>, EtOAc:PE 30:70) to obtain compounds **14m** (diastomeric mixture) (37.1 mg, 57.3  $\mu$ mol, 82 %) as a colorless oil.

**TLC:**  $R_f$  = 0.23 (EtOAc:PE = 30:70).

**<sup>1</sup>H NMR** (400 MHz, CDCl<sub>3</sub>)  $\delta$  8.05 (s, 1 H), 8.02 (s, 1 H), 7.46 (s, 1 H), 7.37 (s, 1 H), 7.24-7.14 (m, 12 H), 7.05-7.03 (m, 4 H), 6.96-6.94 (m, 4 H), 6.19-6.10 (m, 2 H), 3.94 (s, 3 H),



phases were dried over anhydrous  $\text{Na}_2\text{SO}_4$ , and concentrated under reduced pressure. The crude reaction mixture was purified by column chromatography ( $\text{SiO}_2$ , EtOAc:PE 40:60) to obtain compounds **14n** (diastomeric mixture) (23.5 mg, 41.5  $\mu\text{mol}$ , 58 %) as a colorless oil.

**TLC:**  $R_f$  = 0.41 (EtOAc:PE = 40:60).

**$^1\text{H}$  NMR** (400 MHz,  $\text{CDCl}_3$ )  $\delta$  8.22 (s, 1 H), 8.21 (s, 1 H), 7.59 (s, 1 H), 7.55 (s, 1 H), 7.26-7.21 (m, 6 H), 7.07-7.05 (m, 4 H), 6.08-6.01 (m, 2 H), 5.82-5.68 (m, 2 H), 5.09-5.00 (m, 2 H), 3.94 (s, 6 H), 3.81-3.68 (m, 6 H), 3.53-3.44 (m, 2 H), 3.35-3.26 (m, 2 H), 2.94-2.82 (m, 4 H), 2.32-2.14 (m, 4 H), 1.85-1.78 (m, 4 H), 1.27-1.14 (m, 4 H), 0.89 (s, 18 H), 0.06 (s, 12 H) ppm.

**$^{13}\text{C}$  NMR** (100 MHz,  $\text{CDCl}_3$ )  $\delta$  161.2, 160.8, 160.7, 145.4, 145.0, 144.9, 135.3, 135.2, 134.8, 134.7, 133.8, 133.8, 129.0, 128.9, 127.7, 127.6, 122.4, 122.2, 116.9, 116.8, 75.2, 75.1, 74.6, 74.5, 68.7, 59.5, 59.4, 52.5, 41.2, 41.1, 40.6, 40.5, 39.8, 32.6, 32.5, 25.9, 18.2, -4.4, -4.4 ppm.

**IR** (NaCl, film):  $\tilde{\nu}$  ( $\text{cm}^{-1}$ ) = 2591, 2932, 2857, 1746, 1582, 1457, 1441, 1379, 1347, 1323, 1254, 1142, 1115, 1075, 1001, 934, 857, 839, 808, 774, 747, 700.

**HRMS** (ESI+)  $\text{C}_{30}\text{H}_{42}\text{N}_4\text{O}_5\text{Si}$  (566.77):  $m/z$   $[\text{M}+\text{Na}]^+$  calcd. for  $\text{C}_{30}\text{H}_{42}\text{N}_4\text{O}_5\text{SiNa}$ : 589.2817; found: 589.2808.



**2.38**                      **Methyl**                      **2-([1S,2S]-1-[4-{([2R,4R,6S]-6-allyl-4-[[*tert*-butyldimethylsilyl]oxy]tetrahydro-2H-pyran-2-yl)methyl}-1H-1,2,3-triazol-1-yl]-2-methylbutyl)oxazole-4-carboxylate and methyl 2-([1S,2S]-1-[4-{([2S,4S,6R]-6-allyl-4-[[*tert*-butyldimethylsilyl]oxy]tetrahydro-2H-pyran-2-yl)methyl}-1H-1,2,3-triazol-1-yl]-2-methylbutyl)oxazole-4-carboxylate (**14o**).**

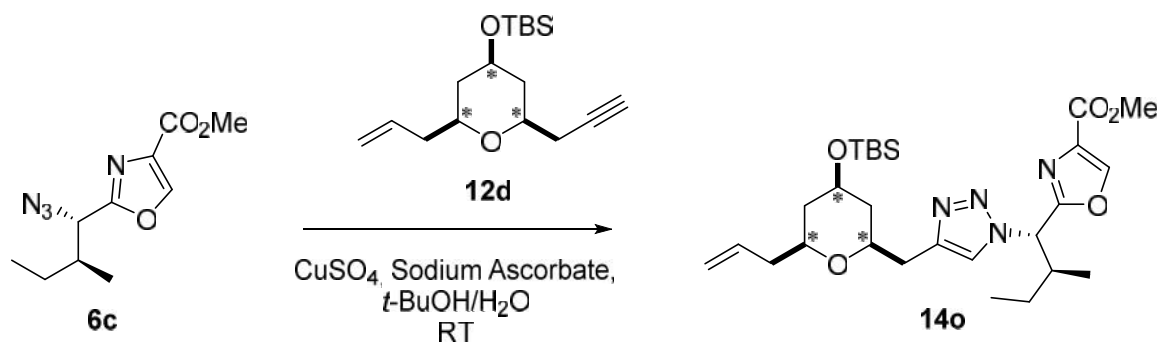

Azide **6c** (20.1 mg, 84.4  $\mu\text{mol}$ , 1.00 eq.) and ethynyl **12d** (25.0 mg, 84.3  $\mu\text{mol}$ , 1.00 eq.) were dispersed in *t*-BuOH (0.5 mL) and H<sub>2</sub>O (0.5 mL). CuSO<sub>4</sub>•5H<sub>2</sub>O (0.4 mg, 1.2  $\mu\text{mol}$ , 0.02 eq.) and sodium ascorbate (3.3 mg, 16.7  $\mu\text{mol}$ , 0.20 eq.) were added and the mixture was stirred overnight at RT. After completion by TLC, brine (15 mL) was added and the aqueous phase was extracted with CH<sub>2</sub>Cl<sub>2</sub> (3  $\times$  15 mL). The combined organic phases were dried over anhydrous Na<sub>2</sub>SO<sub>4</sub>, and concentrated under reduced pressure. The crude reaction mixture was purified by column chromatography (SiO<sub>2</sub>, EtOAc:PE 40:60) to obtain compounds **14o** (diasteric mixture) (19.1 mg, 35.9  $\mu\text{mol}$ , 43 %) as a colorless oil.

**TLC:** *R*<sub>f</sub> = 0.46 (EtOAc:PE = 40:60).

**<sup>1</sup>H NMR** (400 MHz, CDCl<sub>3</sub>)  $\delta$  8.23 (s, 1 H), 8.23 (s, 1 H), 7.73 (s, 1 H), 7.72 (s, 1 H), 5.83-5.72 (m, 2 H), 5.66 (d, 1 H, *J* = 10.6 Hz), 5.65 (d, 1 H, *J* = 10.6 Hz), 5.10-5.00 (m, 4 H), 3.92 (s, 6 H), 3.78-3.70 (m, 2 H), 3.57-3.50 (m, 2 H), 3.35-3.27 (m, 2 H), 2.93-2.83 (m, 4 H), 2.65-2.56 (m, 2 H), 2.33-2.25 (m, 2 H), 2.22-2.16 (m, 2 H), 1.85-1.78 (m, 4 H), 1.28-1.15 (m, 6 H), 1.10-1.02 (m, 2 H), 0.94 (d, 6 H, *J* = 6.7 Hz), 0.89-0.85 (m, 6 H), 0.87 (s, 18 H), 0.01 (s, 12 H) ppm.

**<sup>13</sup>C NMR** (100 MHz, CDCl<sub>3</sub>)  $\delta$  161.3, 161.2, 145.7, 145.6, 144.7, 144.6, 135.2, 135.2, 133.8, 133.7, 121.9, 121.8, 116.9, 116.8, 75.3, 75.3, 74.7, 74.6, 68.7, 62.9, 52.5, 41.4, 41.3, 40.6, 39.1, 39.0, 32.7, 32.6, 26.0, 25.1, 18.2, 10.5, 10.6, -4.4, -4.5 ppm.



**$^{13}\text{C}$  NMR** (100 MHz,  $\text{CDCl}_3$ )  $\delta$  168.5, 168.4, 161.6, 146.6, 146.5, 145.1, 145.0, 135.5, 135.4, 135.3, 135.1, 129.1, 129.0, 128.9, 128.8, 128.4, 127.5, 127.4, 123.4, 116.9, 116.8, 75.1, 74.7, 74.5, 72.2, 68.7, 64.5, 64.4, 52.7, 41.6, 41.4, 41.2, 41.1, 40.5, 32.5, 32.4, 25.9, 18.2, -4.4 ppm.

**IR** (NaCl, film):  $\tilde{\nu}$  ( $\text{cm}^{-1}$ ) = 2951, 2932, 2857, 1738, 1723, 1476, 1460, 1439, 1378, 1250, 1215, 1125, 1077, 997, 837, 776, 701.

**HRMS** (ESI+)  $\text{C}_{30}\text{H}_{42}\text{N}_4\text{O}_4\text{SSi}$  (582.84):  $m/z$   $[\text{M}+\text{Na}]^+$  calcd. for  $\text{C}_{30}\text{H}_{42}\text{N}_4\text{O}_4\text{SSiNa}$ : 605.2588; found: 605.2587.

**2.40 *rel*-(2*R*,4*R*,6*S*)-2-(3,3-Dibromoallyl)-6-propyltetrahydro-2*H*-pyran-4-ol (16a); *rel*-(2*R*,4*S*,6*S*)-4-Bromo-2-(3,3-dibromoallyl)-6-propyltetrahydro-2*H*-pyran (16b).**

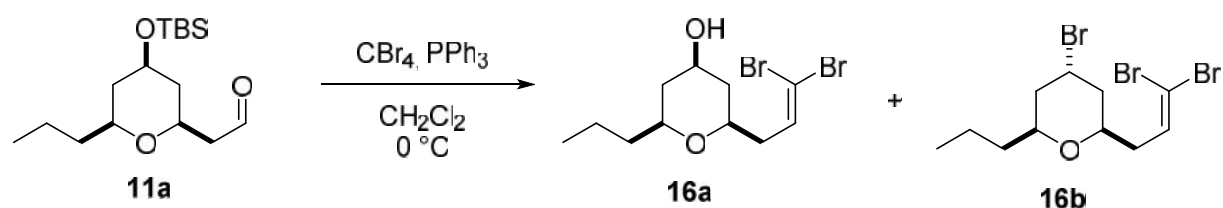

Aldehyde **11a** (241.2 mg, 0.80 mmol, 1.00 eq.) was dissolved in  $\text{CH}_2\text{Cl}_2$  (6 mL) under  $\text{N}_2$  atmosphere.  $\text{PPh}_3$  (842.1 mg, 3.21 mmol, 4.00 eq.) was added and after 10 minutes the solution was cooled down to 0 °C.  $\text{CBr}_4$  (532.4 mg, 1.61 mmol, 2.00 eq.) was added portion wise. After completion by TLC, the reaction was concentrated under reduce pressure. The crude reaction mixture was purified by column chromatography ( $\text{SiO}_2$ , EtOAc:PE 40:60) to obtain compounds **16a** (racemate) (270.6 mg, 0.59 mmol, 74 %) as a yellowish oil and compounds **16b** (racemate) (83.5 mg, 0.21 mmol, 26 %) as a yellowish oil.

**Compounds 16a:**

**TLC:**  $R_f$  = 0.12 (EtOAc:PE = 15:85).

**$^1\text{H}$  NMR** (400 MHz,  $\text{CDCl}_3$ )  $\delta$  6.52 (dd, 1 H,  $J$  = 7.1, 7.1 Hz), 3.79 (dddd, 1 H,  $J$  = 10.9, 10.9, 4.7, 4.7 Hz), 3.38 (dddd, 1 H,  $J$  = 11.4, 7.3, 5.6, 2.0 Hz), 3.28 (dddd, 1 H,  $J$  = 11.8, 7.1, 4.6, 1.8 Hz), 2.33-2.29 (m, 2 H), 1.97-1.91 (m, 2 H), 1.58-1.33 (m, 4 H), 1.23-1.10 (m, 2 H), 0.92 (t, 3 H,  $J$  = 7.1 Hz) ppm.

**$^{13}\text{C}$  NMR** (100 MHz,  $\text{CDCl}_3$ )  $\delta$  135.2, 90.1, 75.6, 73.6, 68.2, 41.1, 40.8, 39.5, 38.2, 18.9, 14.2 ppm.

IR (NaCl, film):  $\tilde{\nu}$  (cm<sup>-1</sup>) = 3363, 2951, 2935, 2866, 1624, 1458, 1373, 1327, 1253, 1222, 1141, 1114, 1076, 1037, 968, 894, 848, 810, 779.

HRMS (ESI+) C<sub>11</sub>H<sub>18</sub>Br<sub>2</sub>O<sub>2</sub> (342.07):  $m/z$  [M+Na]<sup>+</sup> calcd. for C<sub>11</sub>H<sub>18</sub>Br<sub>2</sub>O<sub>2</sub>Na: 364.95457; found: 364.95279.

**Compounds 16b:**

TLC:  $R_f$  = 0.66 (EtOAc:PE = 15:85)

<sup>1</sup>H NMR (400 MHz, CDCl<sub>3</sub>)  $\delta$  6.53 (dd, 1 H,  $J$  = 7.0, 7.0 Hz), 4.72 (dddd, 1 H,  $J$  = 3.2, 3.2, 3.1, 3.1 Hz), 3.95 (dddd, 1 H,  $J$  = 11.0, 7.2, 5.6, 1.7 Hz), 3.85 (dddd, 1 H,  $J$  = 9.8, 7.4, 4.4, 1.8 Hz), 2.34-2.23 (m, 2 H), 2.00-1.94 (m, 2 H), 1.78-1.65 (m, 2 H), 1.55-1.32 (m, 4 H), 0.93 (t, 3 H,  $J$  = 7.1 Hz) ppm.

<sup>13</sup>C NMR (100 MHz, CDCl<sub>3</sub>)  $\delta$  135.1, 90.2, 72.2, 70.5, 50.6, 39.5, 39.3, 39.2, 37.8, 18.8, 14.2 ppm.

IR (NaCl, film):  $\tilde{\nu}$  (cm<sup>-1</sup>) = 2958, 2931, 2900, 2866, 1462, 1427, 1377, 1323, 1230, 1184, 1076, 999, 898, 848, 813, 775, 702.

**2.41 *rel*-(2*R*,4*R*,6*S*)-2-(3,3-Dibromoallyl)-6-propyltetrahydro-2*H*-pyran-4-yl acetate (17).**

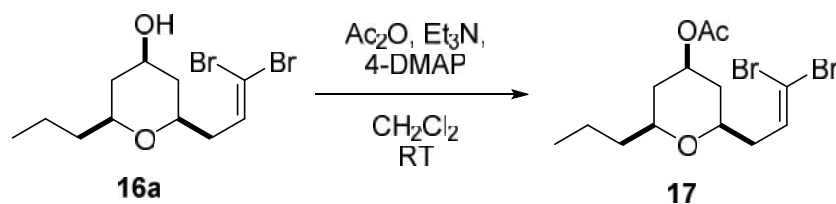

Alcohol **16a** (50.0 mg, 0.15 mmol, 1.00 eq.) was dissolved in CH<sub>2</sub>Cl<sub>2</sub> (2 mL) under N<sub>2</sub> atmosphere. EtN<sub>3</sub> (0.12 mL, 0.88 mmol, 6.00 eq.) and 4-DMAP (1.8 mg, 0.02 mmol, 0.1 eq.) were added followed by Ac<sub>2</sub>O (0.04 mL, 0.44 mmol, 3.00 eq.) at RT. After completion by TLC, NaHCO<sub>3</sub> sat. (10 mL) was added and the aqueous phase was extracted with CH<sub>2</sub>Cl<sub>2</sub> (3 × 10 mL). The combined organic phases were dried over anhydrous Na<sub>2</sub>SO<sub>4</sub>, and concentrated under reduced pressure. The crude reaction mixture was purified by column chromatography (SiO<sub>2</sub>, EtOAc:PE 15:85) to obtain compounds **17** (racemate) (43.2 mg, 0.11 mmol, 77 %) as a pale yellow oil.

TLC:  $R_f$  = 0.53 (EtOAc:PE = 15:85).

**<sup>1</sup>H NMR** (400 MHz, CDCl<sub>3</sub>) δ 6.51 (dd, 1 H, *J* = 7.1, 7.1 Hz), 4.88 (dddd, 1 H, *J* = 11.3, 11.3, 4.8, 4.8 Hz), 3.44 (dddd, 1 H, *J* = 8.4, 7.4, 5.7, 1.9 Hz), 3.35 (dddd, 1 H, *J* = 9.2, 7.1, 4.6, 1.8 Hz), 2.33-2.29 (m, 2 H), 2.05 (s, 3 H), 1.99-1.93 (m, 2 H), 1.57-1.33 (m, 4 H), 1.32-1.19 (m, 2 H), 0.92 (t, 3 H, *J* = 7.0 Hz) ppm.

**<sup>13</sup>C NMR** (100 MHz, CDCl<sub>3</sub>) δ 170.7, 134.9, 90.3, 75.5, 73.4, 70.4, 39.5, 38.2, 37.2, 36.9, 21.5, 18.8, 14.2 ppm.

**IR** (NaCl, film):  $\tilde{\nu}$  (cm<sup>-1</sup>) = 3506, 2958, 2931, 2866, 1743, 1720, 1624, 1454, 1435, 1369, 1327, 1242, 1165, 1083, 1033, 975, 906, 852, 810, 779.

**HRMS** (ESI+) C<sub>13</sub>H<sub>20</sub>Br<sub>2</sub>O<sub>3</sub> (384.11): *m/z* [M+Na]<sup>+</sup> calcd. for C<sub>13</sub>H<sub>20</sub>Br<sub>2</sub>O<sub>3</sub>Na: 406.96515; found: 406.96275.

**2.42 Methyl 2-([S]-1-[4-{([2R,4R,6S]-4-hydroxy-6-propyltetrahydro-2H-pyran-2-yl)methyl}-1H-1,2,3-triazol-1-yl]-2-phenylethyl)oxazole-4-carboxylate and methyl 2-([S]-1-[4-{([2S,4S,6R]-4-hydroxy-6-propyltetrahydro-2H-pyran-2-yl)methyl}-1H-1,2,3-triazol-1-yl]-2-phenylethyl)oxazole-4-carboxylate (15).**

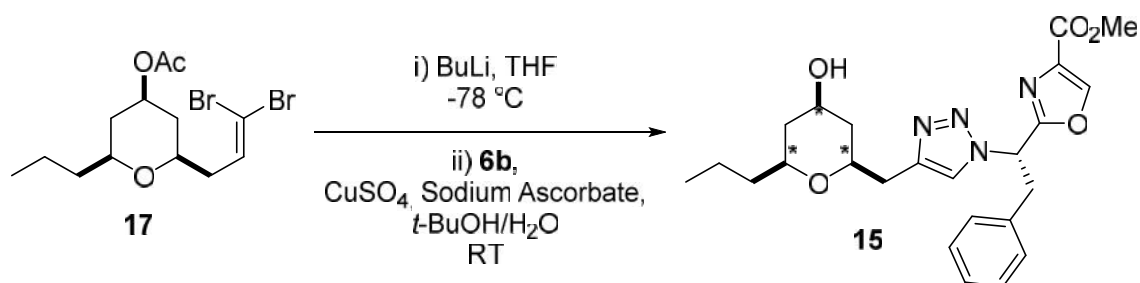

Under N<sub>2</sub> atmosphere, compounds **17** (85.0 mg, 0.22 mmol, 1.00 eq.) was dissolved in THF (2 mL) and the solution was cooled down to -78 °C. BuLi (1.6 M in hexane, 0.31 mL, 0.49 mmol, 2.20 eq.) was added dropwise. After completion by TLC, NH<sub>4</sub>CO<sub>3</sub> sat. (10 mL) was added and the aqueous phase was extracted with Et<sub>2</sub>O (3 × 10 mL). The combined organic phases were dried over anhydrous Na<sub>2</sub>SO<sub>4</sub>, and concentrated under reduced pressure. The crude reaction mixture was purified by column chromatography (SiO<sub>2</sub>, EtOAc:PE 15:85 to 50:50) to obtain an inseparable mixture of the ethynil (12.3 mg, 0.07 mmol, 31 %, measured by NMR) and the deacetylated SM (25.5 mg, 0.07 mmol, 34 %, measured by NMR) which was used without further purification. The mixture and azide **6b** (18.2 mg, 0.07 mmol, 1.00 eq.) were dispersed in *t*-BuOH (0.5 mL) and H<sub>2</sub>O (0.5 mL). CuSO<sub>4</sub>•5H<sub>2</sub>O (0.3 mg, 0.8 μmol, 0.02 eq.) and sodium ascorbate (2.7 mg, 13.6 μmol, 0.20 eq.) were added and the mixture was stirred overnight at RT. After completion by TLC, brine (10 mL) was added and the aqueous phase was extracted

with CH<sub>2</sub>Cl<sub>2</sub> (3 × 10 mL). The combined organic phases were dried over anhydrous Na<sub>2</sub>SO<sub>4</sub>, and concentrated under reduced pressure. The crude reaction mixture was purified by column chromatography (SiO<sub>2</sub>, EtOAc) to obtain compounds **15** (diastomeric mixture) (25.9 mg, 57.0 μmol, 84 %) as a white solid.

**TLC:** *R*<sub>f</sub> = 0.59 (EtOAc).

**MP:** 122.5-124.0 °C

**<sup>1</sup>H NMR** (400 MHz, CDCl<sub>3</sub>) δ 8.21 (s, 2 H), 7.52 (s, 1 H), 7.51 (s, 1 H), 7.24-7.22 (m, 6 H), 7.07-7.05 (m, 4 H), 6.09-6.03 (m, 2 H), 3.93 (s, 6 H), 3.80-3.68 (m, 6 H), 3.54-3.46 (m, 2 H), 3.29-3.20 (m, 2 H), 2.89-2.75 (m, 4 H), 1.94-1.90 (m, 8 H), 1.54-1.48 (m, 2 H), 1.39-1.28 (m, 6 H), 1.19-1.07 (m, 4 H), 0.89 (t, 3 H, *J* = 7.1 Hz), 0.86 (t, 3 H, *J* = 7.1 Hz) ppm.

**<sup>13</sup>C NMR** (100 MHz, CDCl<sub>3</sub>) δ 161.1, 160.6, 145.3, 145.2, 145.0, 134.7, 134.6, 133.8, 133.7, 129.0, 128.9, 127.7, 127.6, 122.0, 121.8, 75.5, 75.4, 74.5, 74.4, 68.1, 59.4, 59.3, 52.5, 41.1, 41.0, 40.8, 40.7, 39.8, 39.7, 38.3, 38.2, 32.5, 19.0, 18.9, 14.2, 14.1 ppm.

**IR** (NaCl, film):  $\tilde{\nu}$  (cm<sup>-1</sup>) = 3425, 3147, 2935, 2866, 1743, 1581, 1546, 1496, 1438, 1373, 1323, 1269, 1230, 1199, 1141, 1111, 1041, 1002, 968, 937, 864, 806, 744, 702.

**HRMS** (ESI+) **C<sub>24</sub>H<sub>30</sub>N<sub>4</sub>O<sub>5</sub>** (454.53): *m/z* [M+H]<sup>+</sup> calcd. for C<sub>24</sub>H<sub>31</sub>N<sub>4</sub>O<sub>5</sub>: 455.2289; found: 455.2312.

### 3. NMR analysis for *cis*-18a and *trans*-18a (trifluoroacetic ester of 8a)

**Analysis of coupling constants for *cis* and *trans* compounds:**

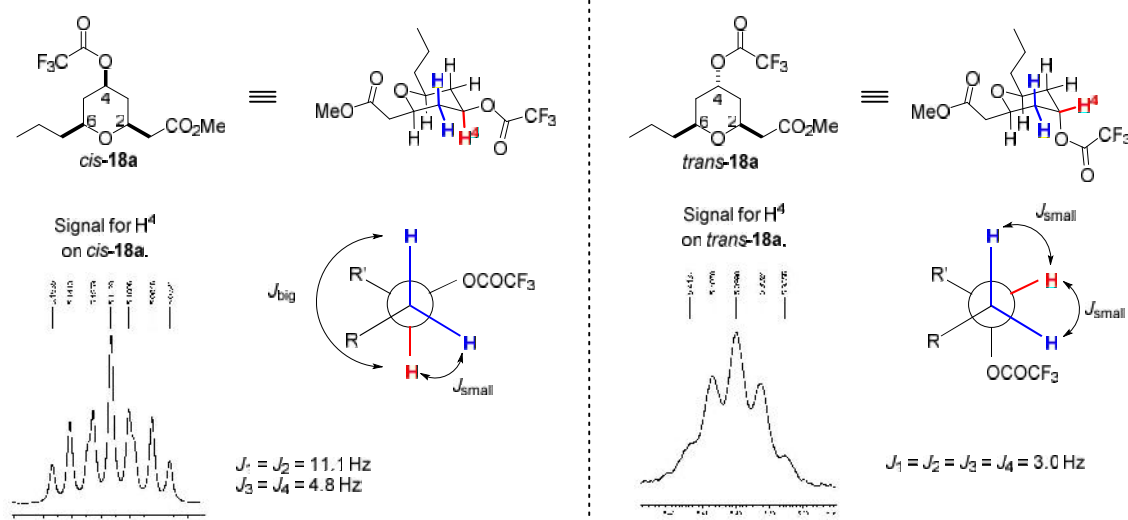

**NOE analysis for *cis*-18a:**

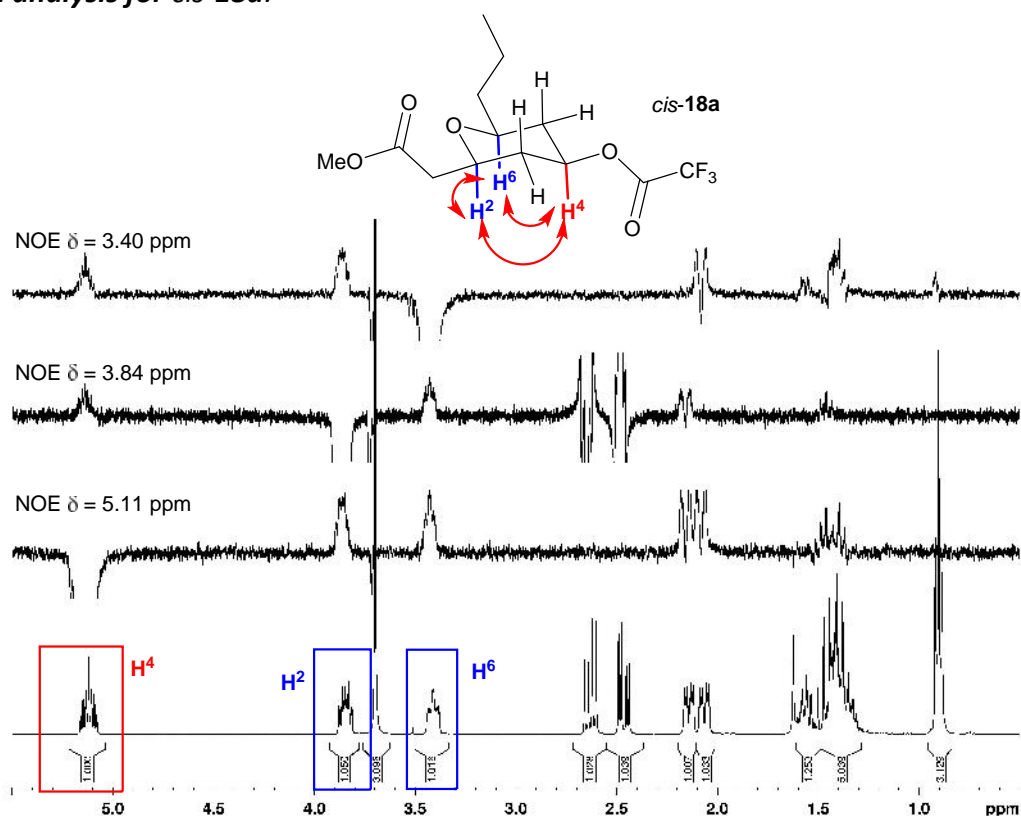

#### 4. General Methods (Biological assays)

**Cell lines and cell cultures:** The human cancer cell lines HBL-100 (breast), HeLa (cervix), T-47D (breast), WiDr (colon), the non-small human lung cancer cell lines A549, SW1573 and its P-gp overexpressing variant (SW1573/Pgp) were kindly provided by Dr. Godefridus J. Peters (Cancer Center Amsterdam, Vrije Universiteit, Amsterdam, The Netherlands). The human fibroblast cell line BJ-hTert was a kindly provided by Dr. Raimundo Freire (HUC, Universidad de La Laguna, Spain). All cells were grown in RPMI 1640 supplemented with 2 mM glutamine, 5% fetal bovine serum and antibiotics. Cells were grown at 37°C in a humidified atmosphere of 5% CO<sub>2</sub> and maintained at low passage.

**Antiproliferative activity:** The antiproliferative activity was tested in vitro against the human cell lines using the protocol of the National Cancer Institute (NCI) of the USA with minor modifications.<sup>6</sup>

**ROS production:** The level of ROS was measured using the ROS-Glo™ H<sub>2</sub>O<sub>2</sub> Assay (Promega Corporation, USA). Cells were exposed to compounds at the indicated dose for 48 h, after which time the nonlytic assay was performed following manufacturer's indications. Luminescence was measured on a Synergy HTX multimode microplate reader (BioTek, USA).



## 5. Antiproliferative activities

| Compounds  | CLogP | A549  | HBL-100 | HeLa  | SW1573 | T-47D | WiDr  |
|------------|-------|-------|---------|-------|--------|-------|-------|
| <b>16b</b> | 5.28  | 81    | -       | > 100 | > 100  | 97    | 58    |
| <b>17</b>  | 2.68  | > 100 | -       | > 100 | > 100  | > 100 | > 100 |

## 6. References

1. W. L. F. Armaregro, C. L. L. Chai in *Purification of Laboratory Chemicals*, Elsevier, 2009.
2. J. Neidhöfer, S. Blechert, *Synthesis*, 2004, 3047-3054.
3. M. Wada, H. Ohki, K. Akiba, *Bull. Chem. Soc. Jpn.*, 1990, **63**, 1738-1747.
4. S. E. Denmark, S. T. Nguyen, *Org. Lett.*, 2009, **11**, 781-784.
5. Synthesis and data for alcohol **3d**, B. W. Parks, R. D. Gilbertson, D. W. Domaille, J. E. Hutchinson, *J. Org. Chem.*, 2006, **71**, 9622-9627.
6. P. O. Miranda, J. M. Padrón, J. I. Padrón, J. Villar, V. S. Martín. *ChemMedChem*, 2006, **1**, 323–329.

## 7. NMR spectra

Compounds **8a**

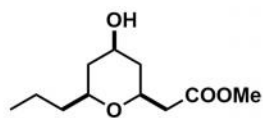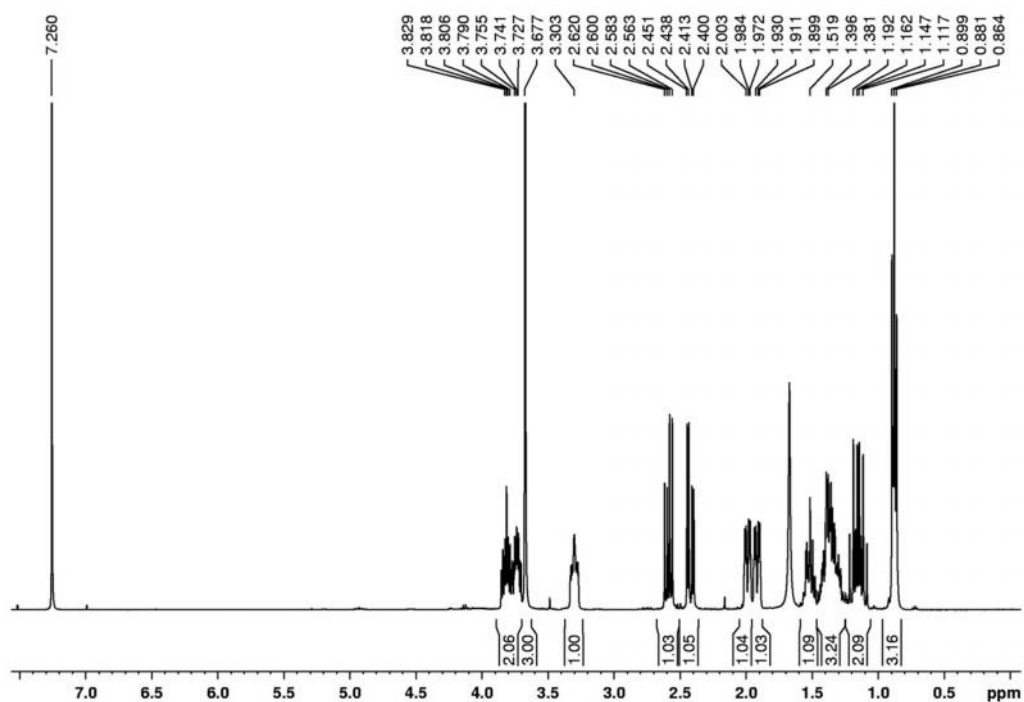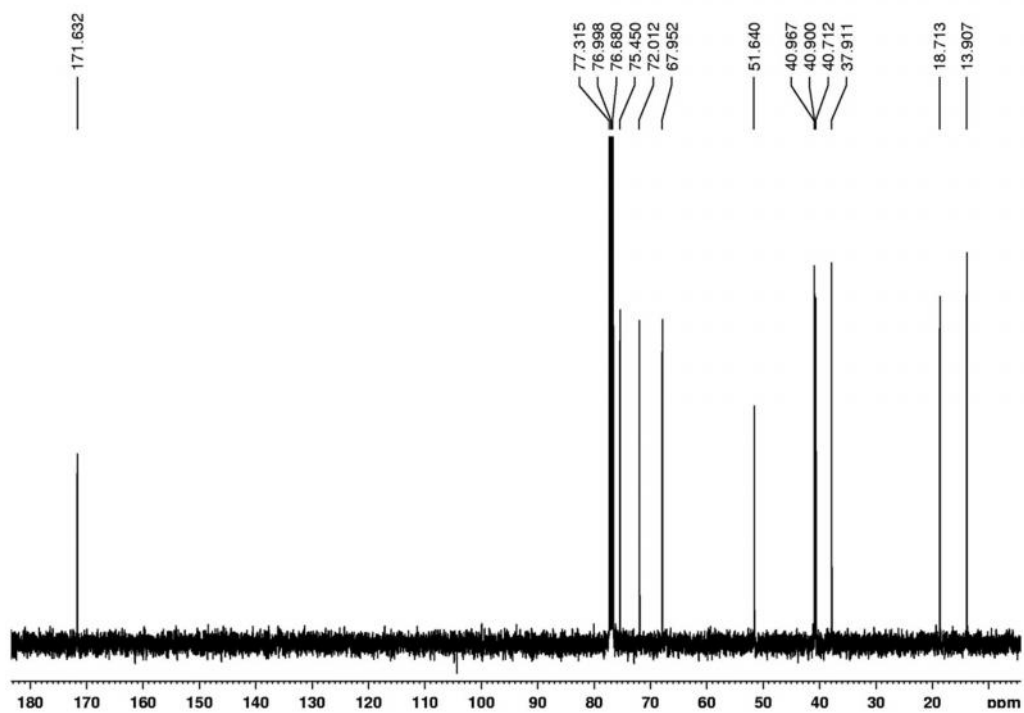

Compounds **9a**

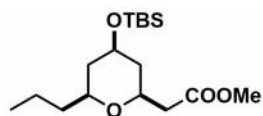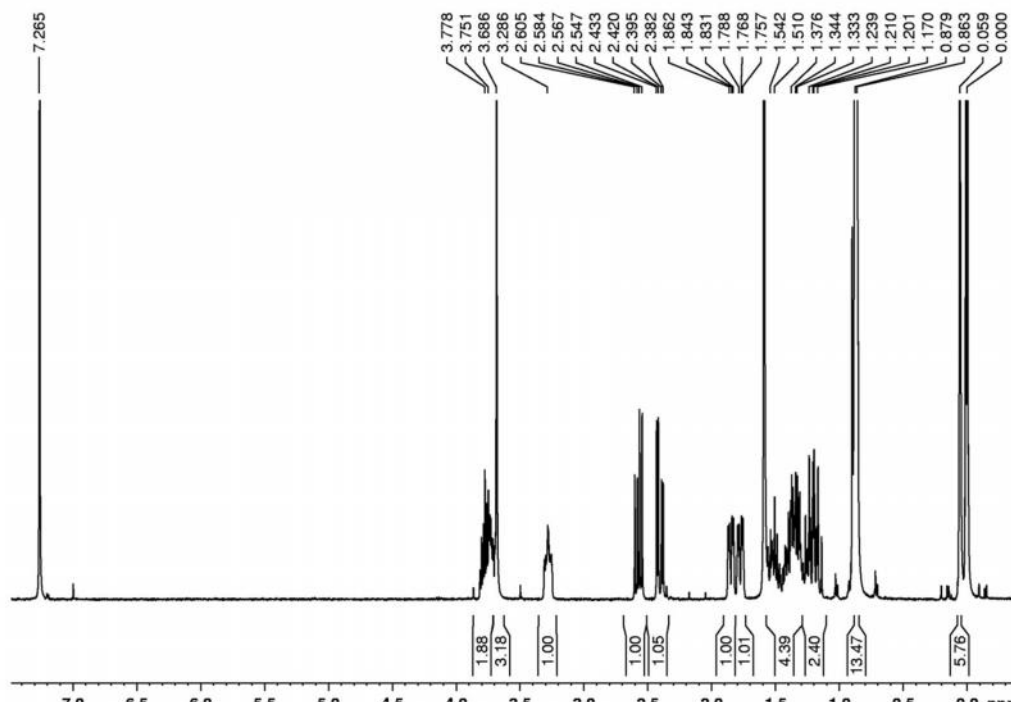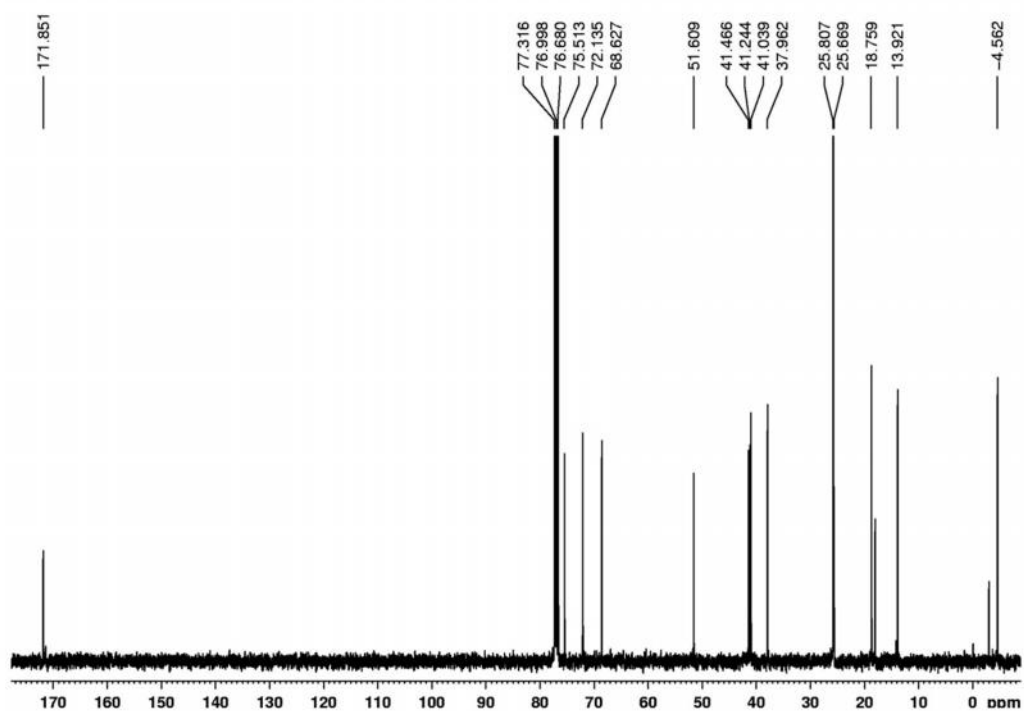

Compounds **10a**

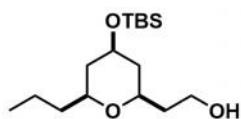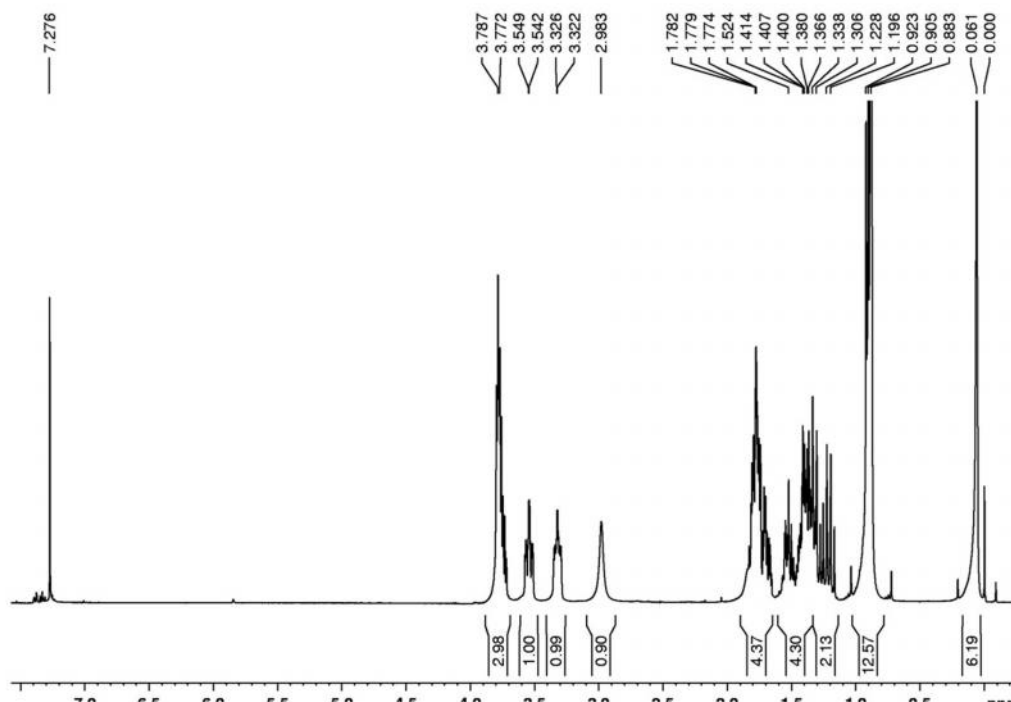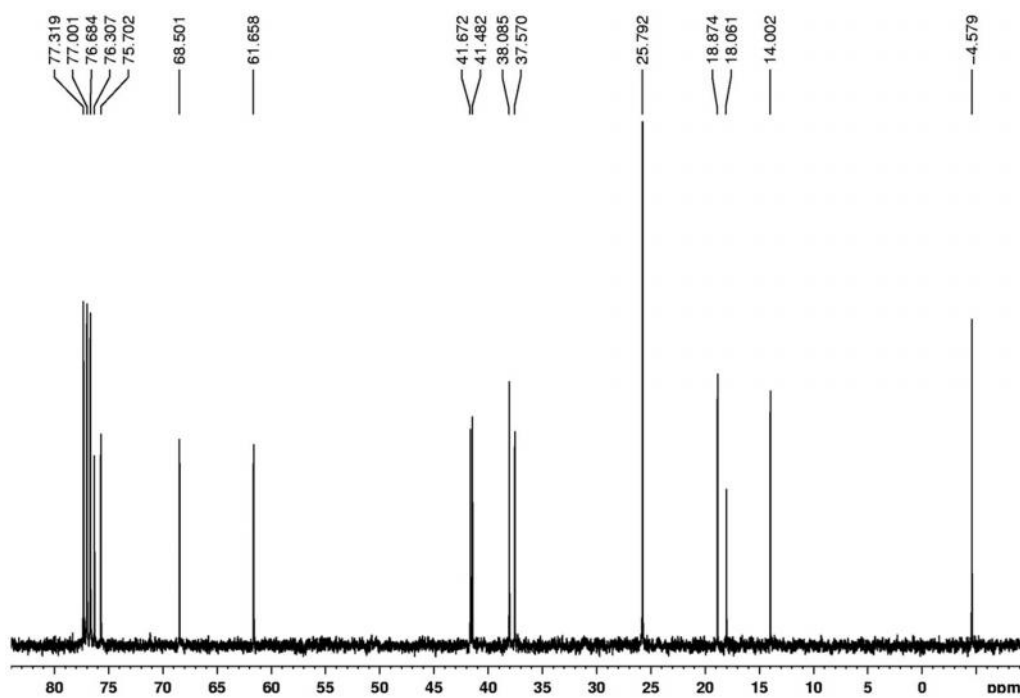

Compounds **11a**

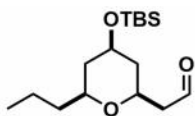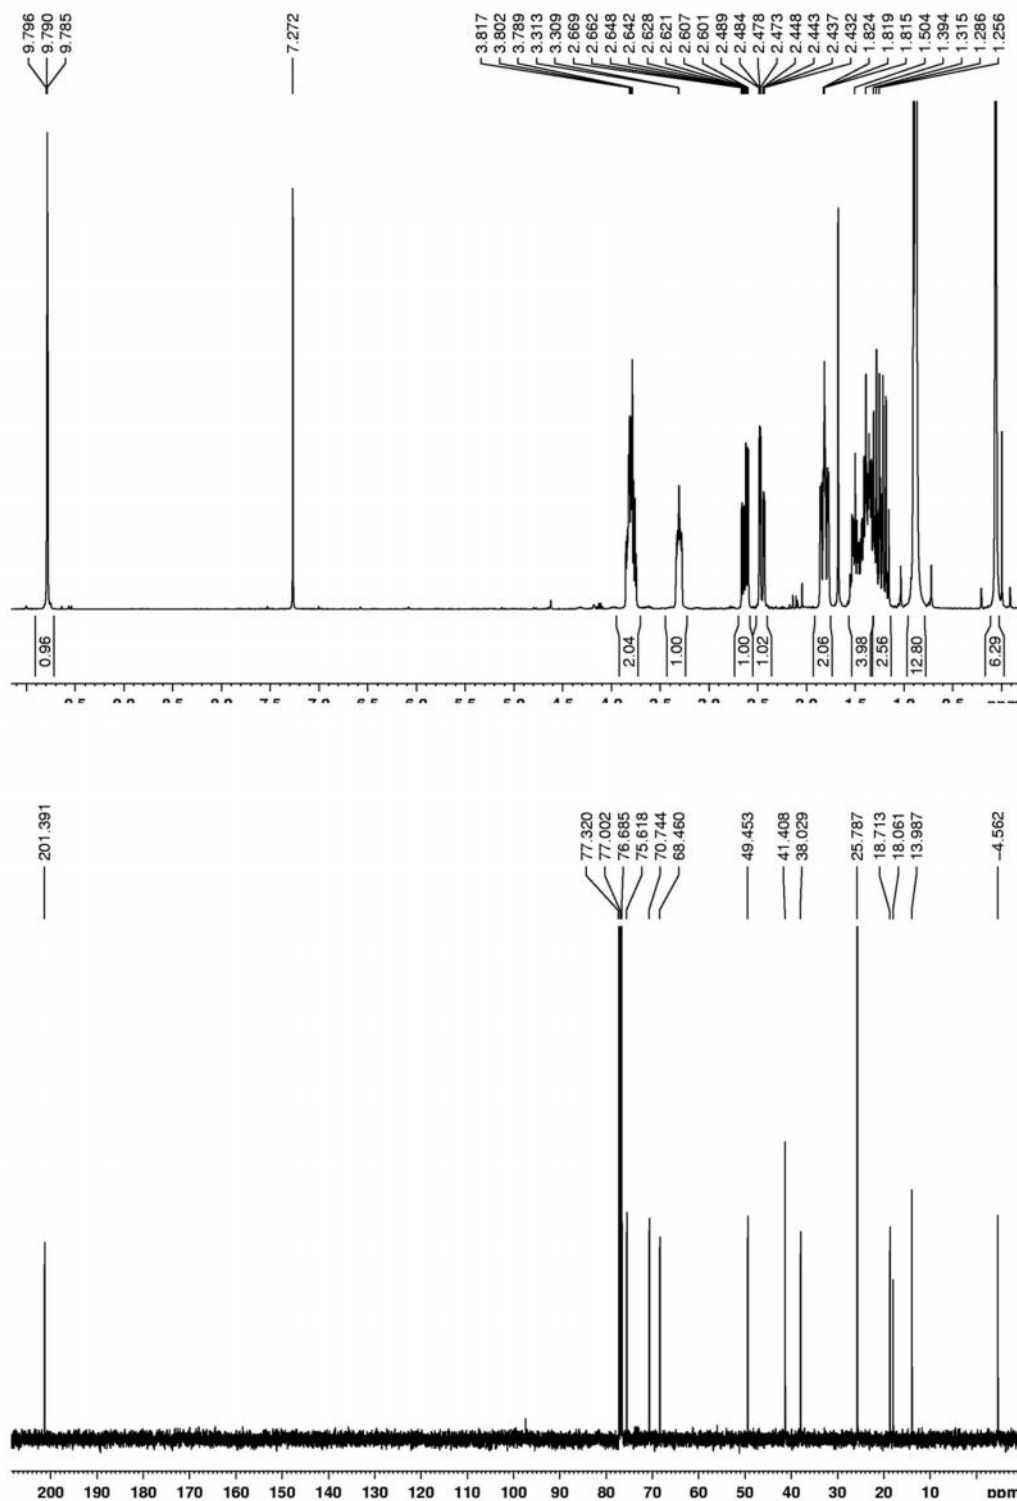

Compounds **12a**

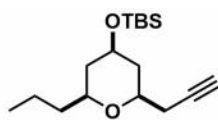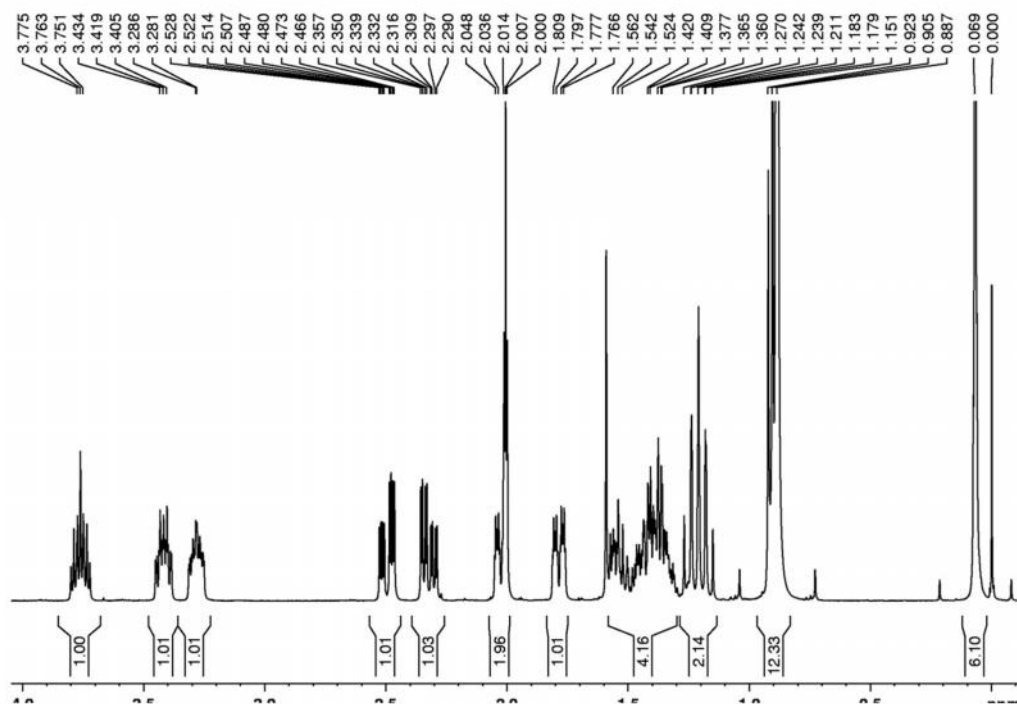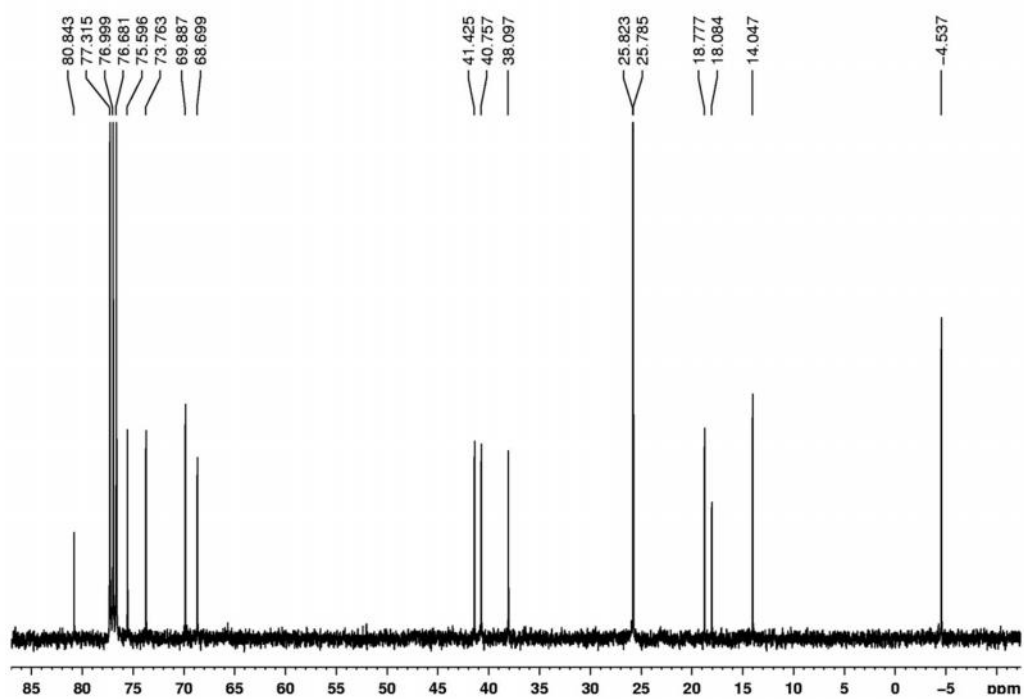

Compounds **8b**

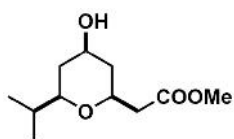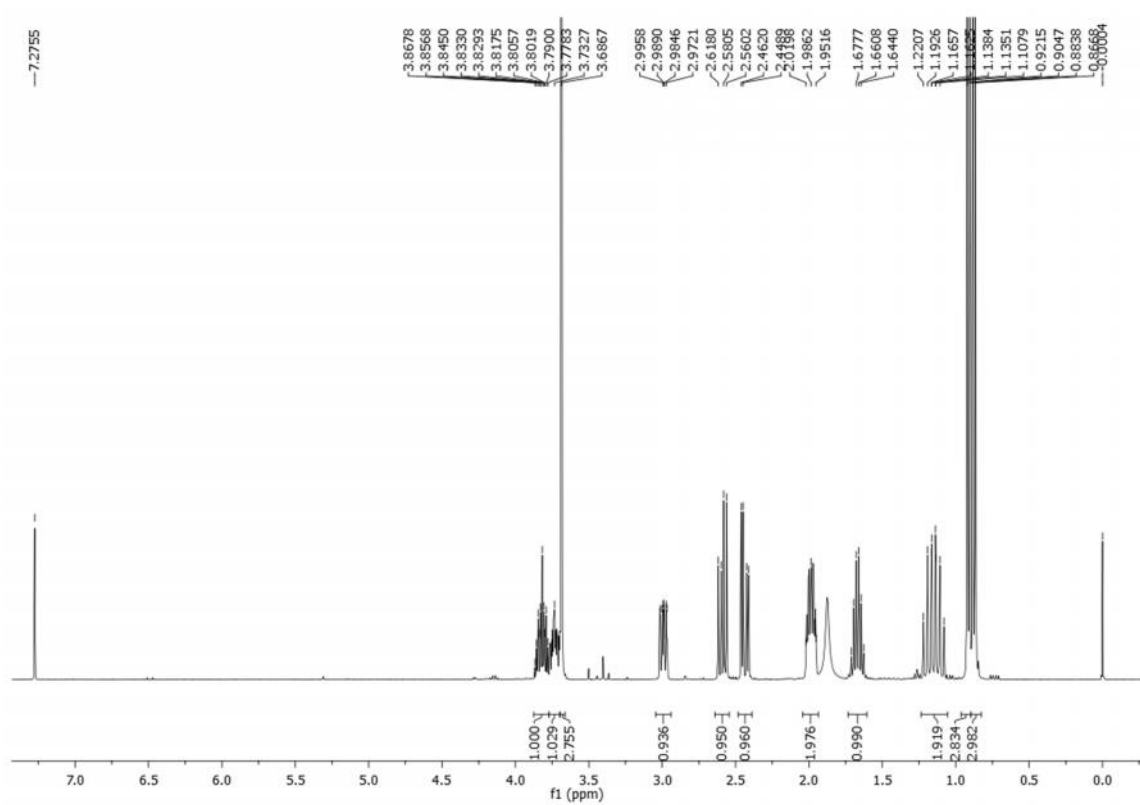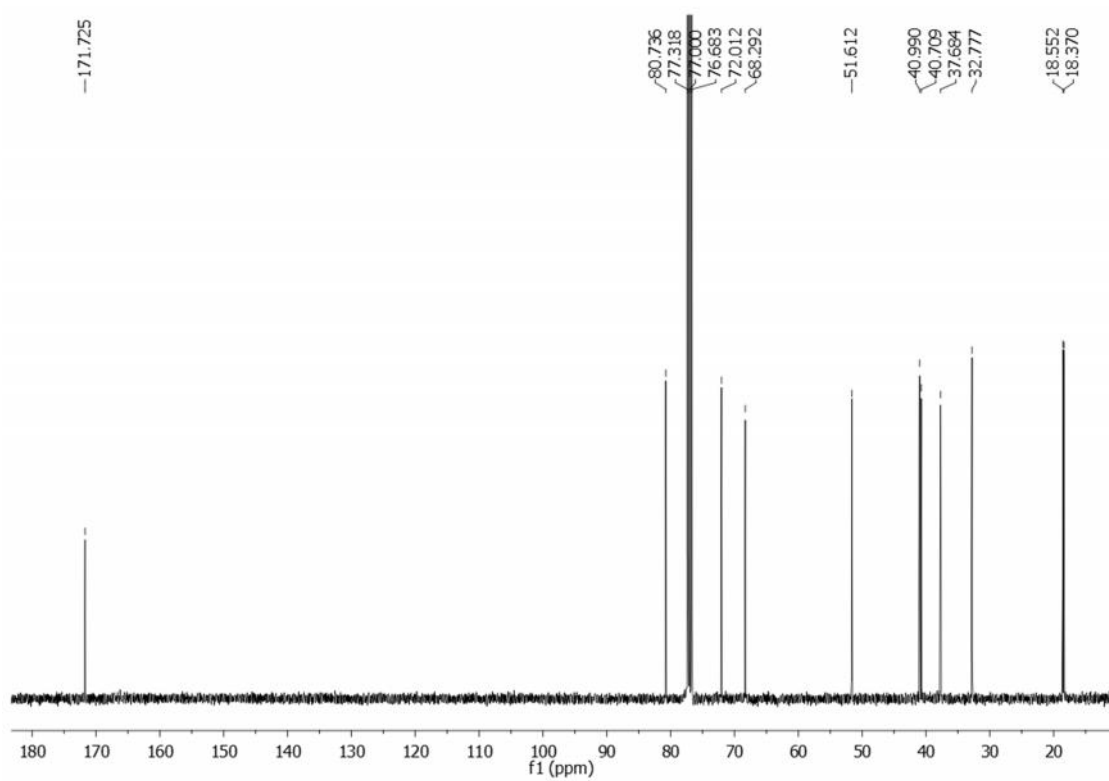



# Compounds 9b

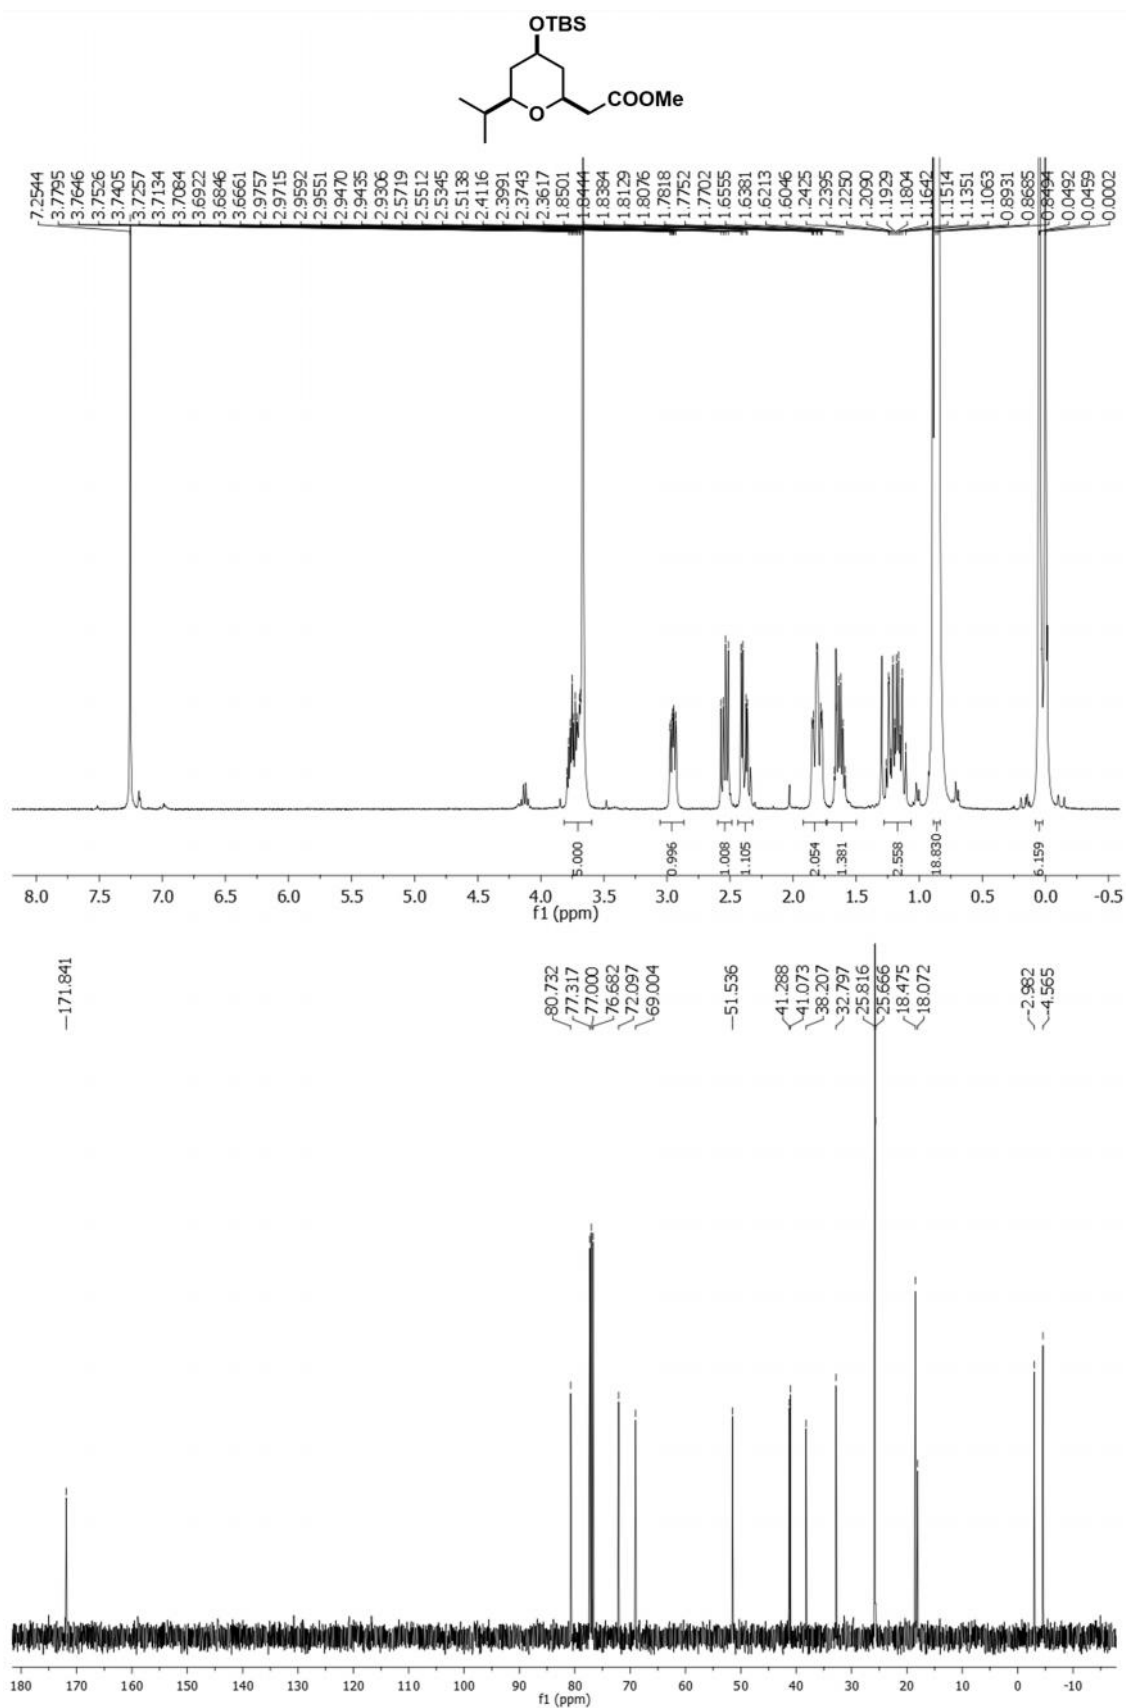

# Compounds **10b**

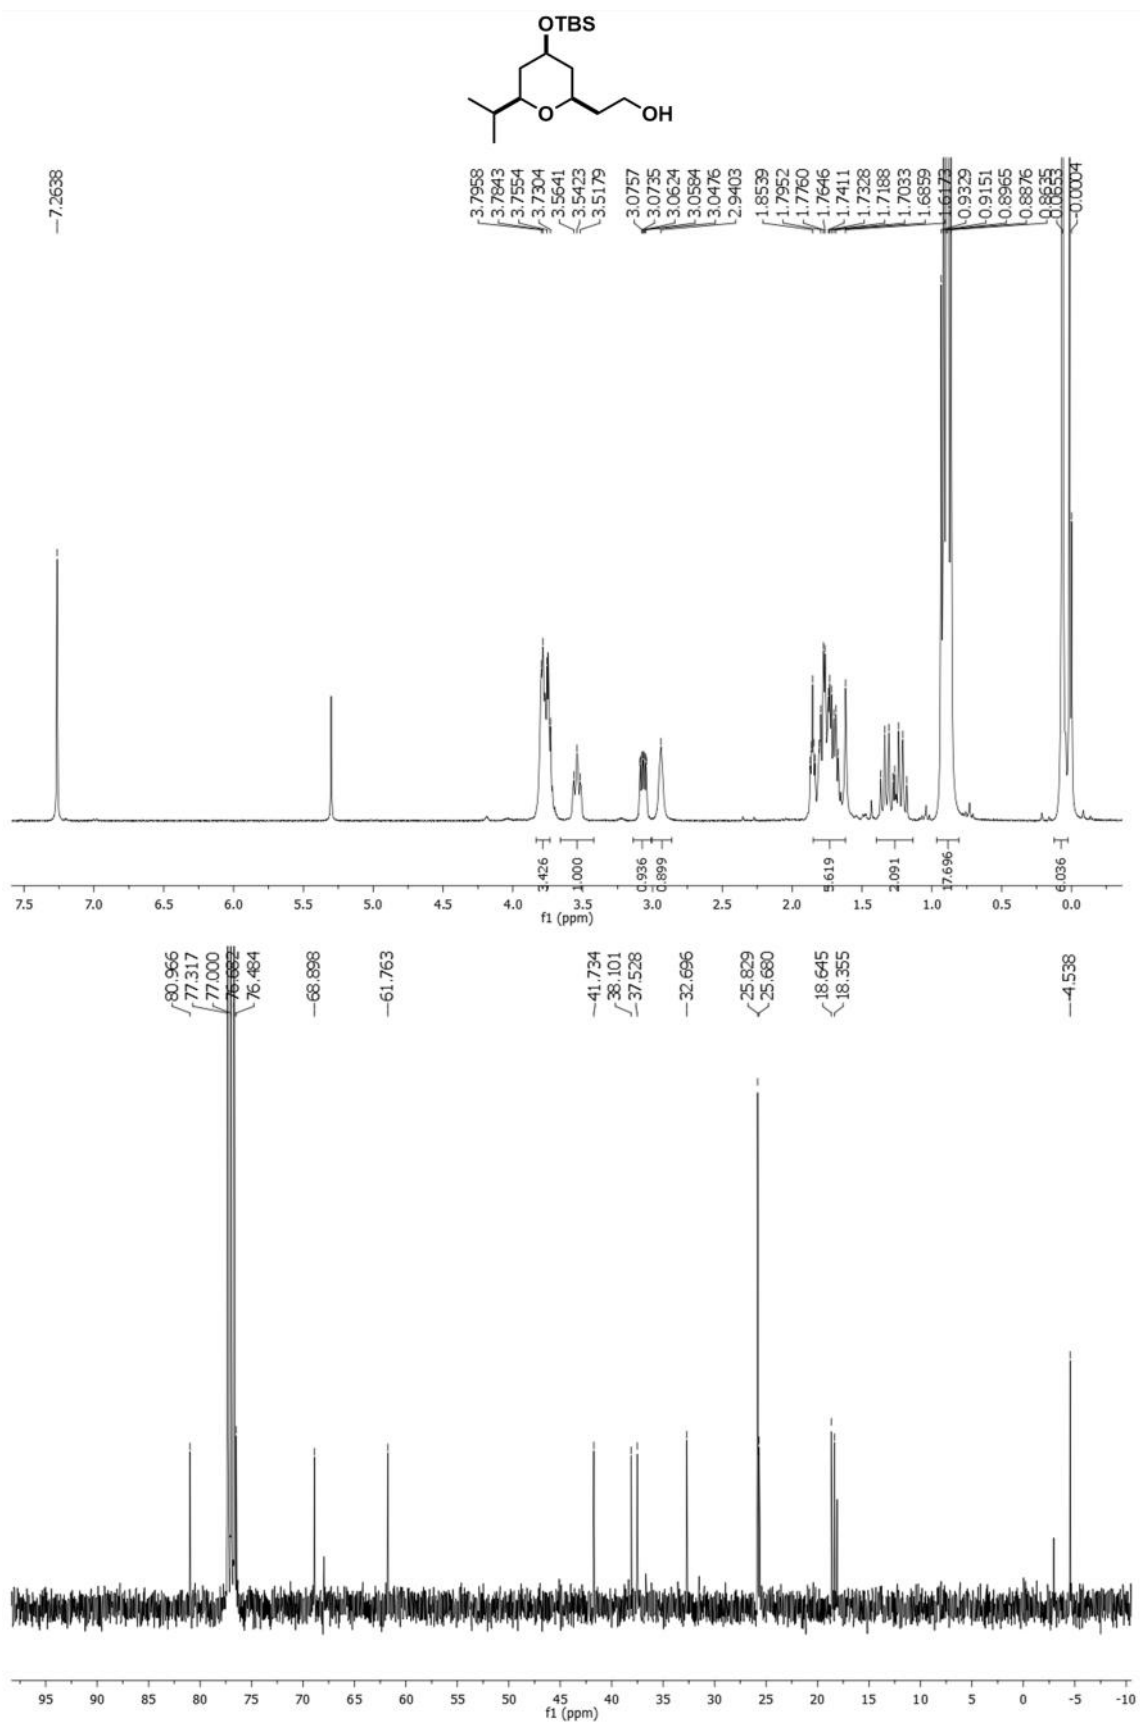

Compounds **11b**

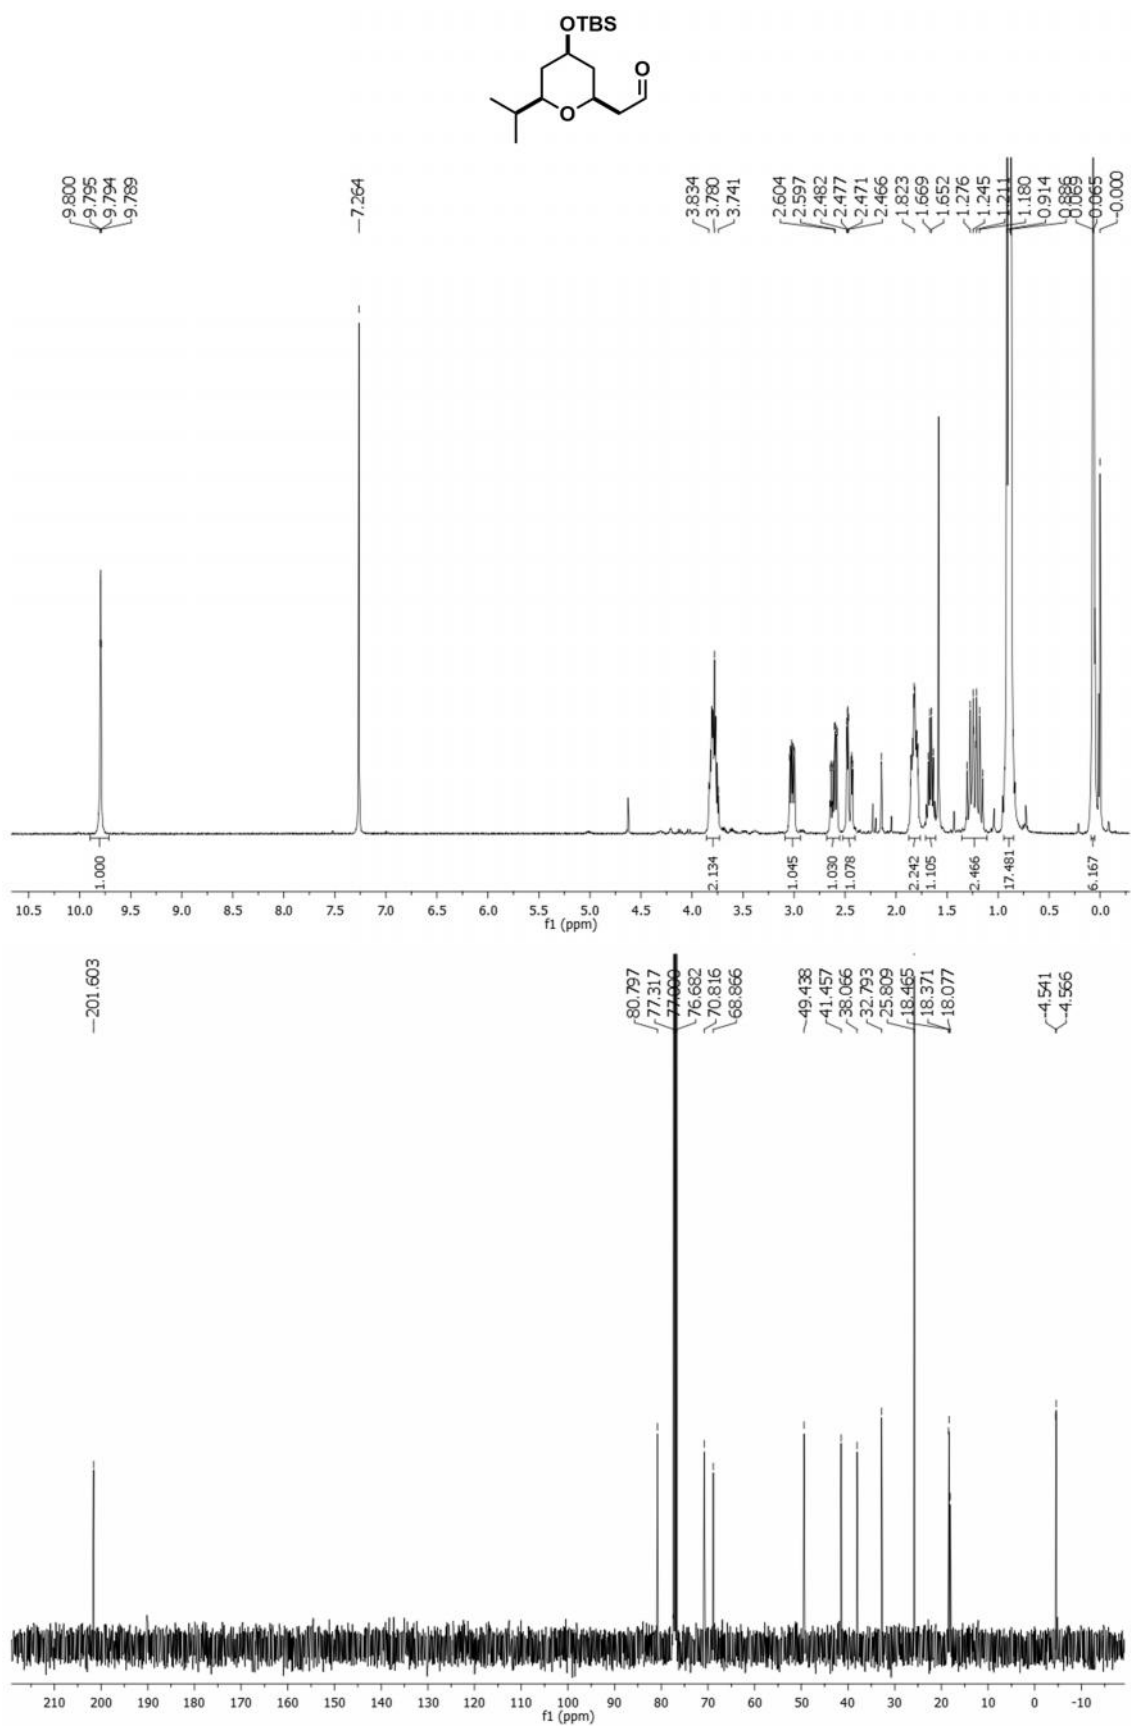

# Compounds **12b**

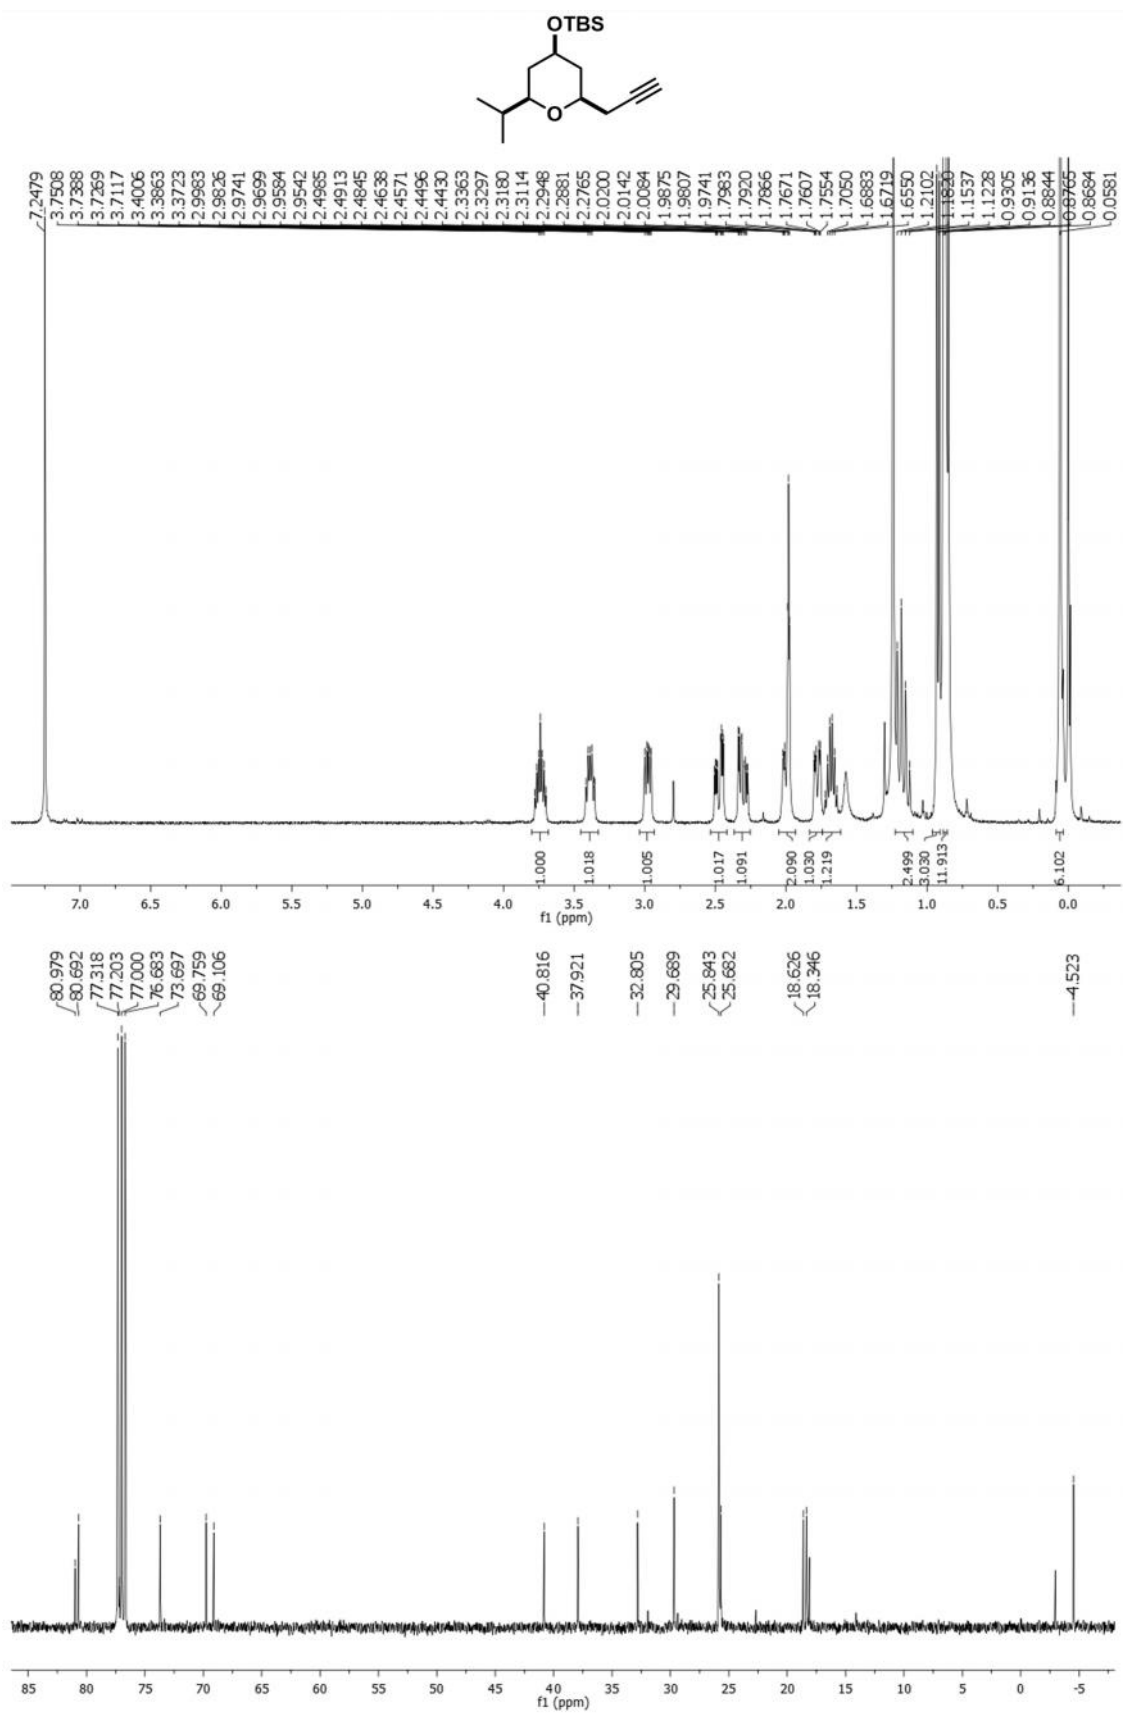

# Compounds **8c**

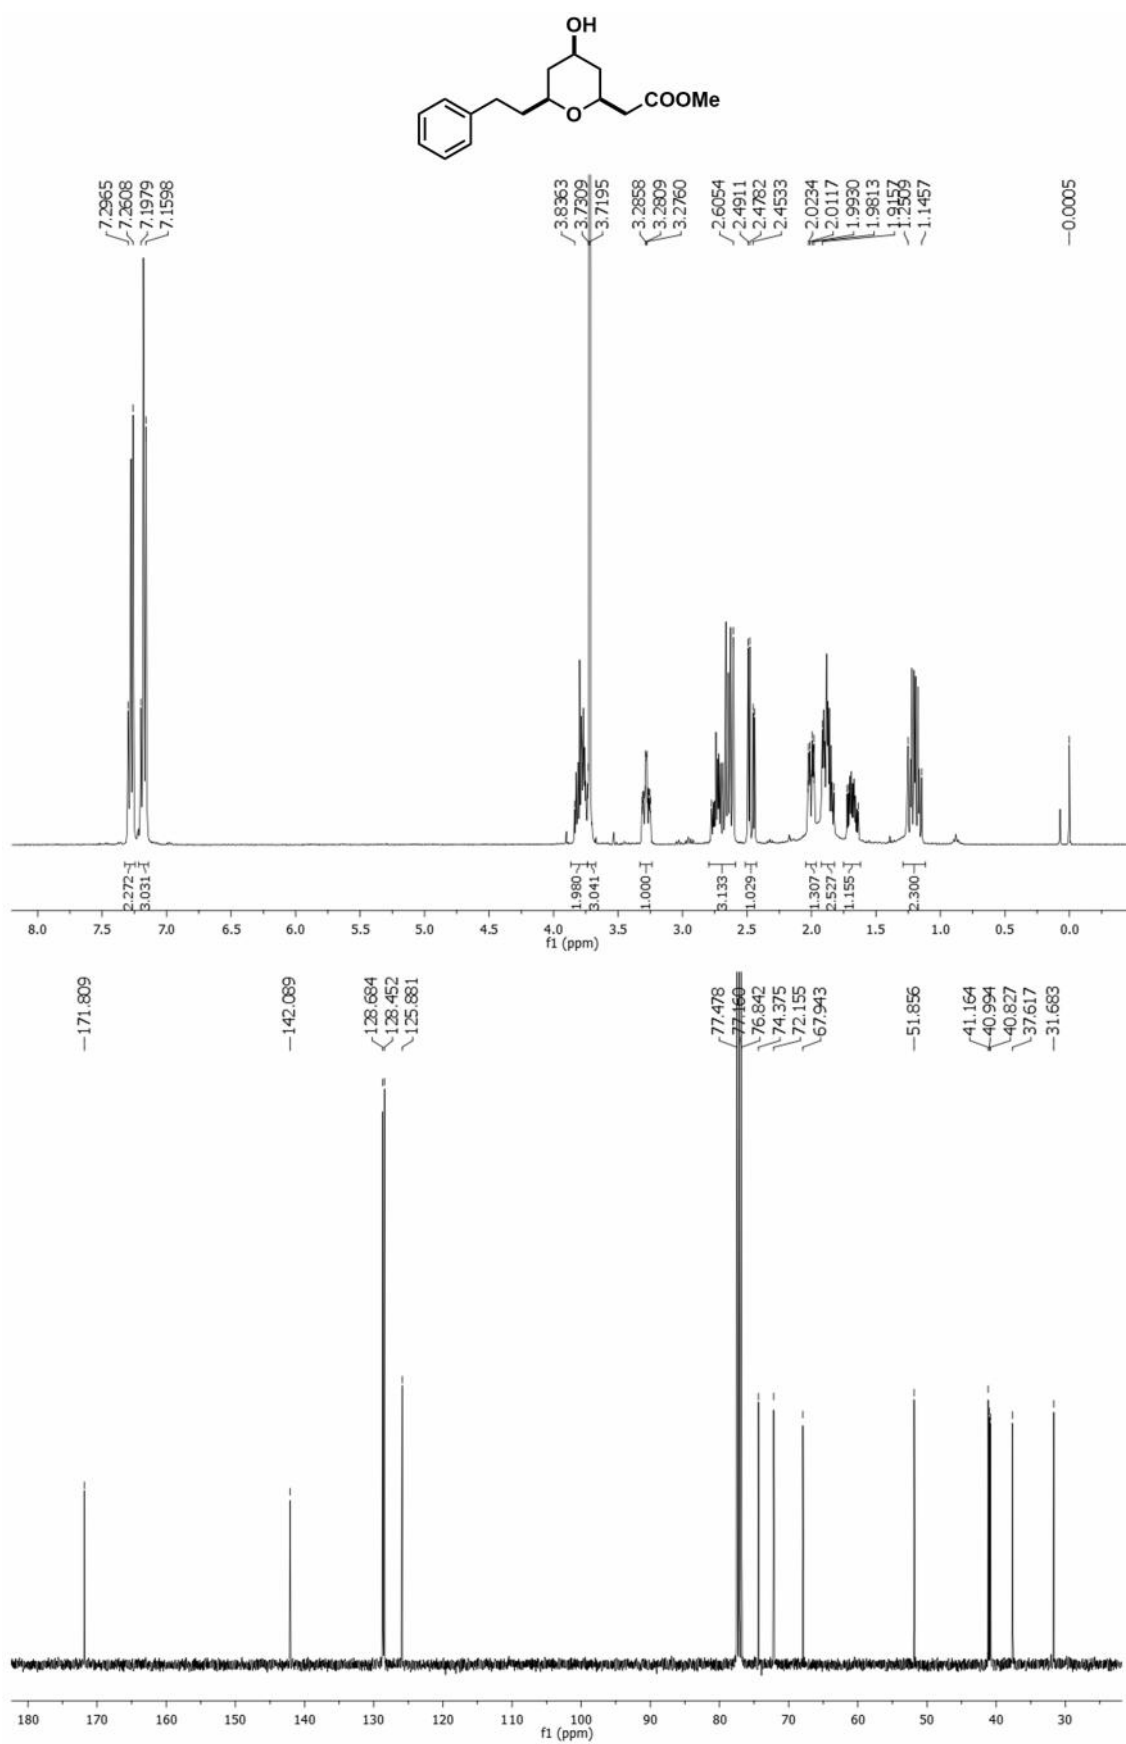

# Compounds 9c

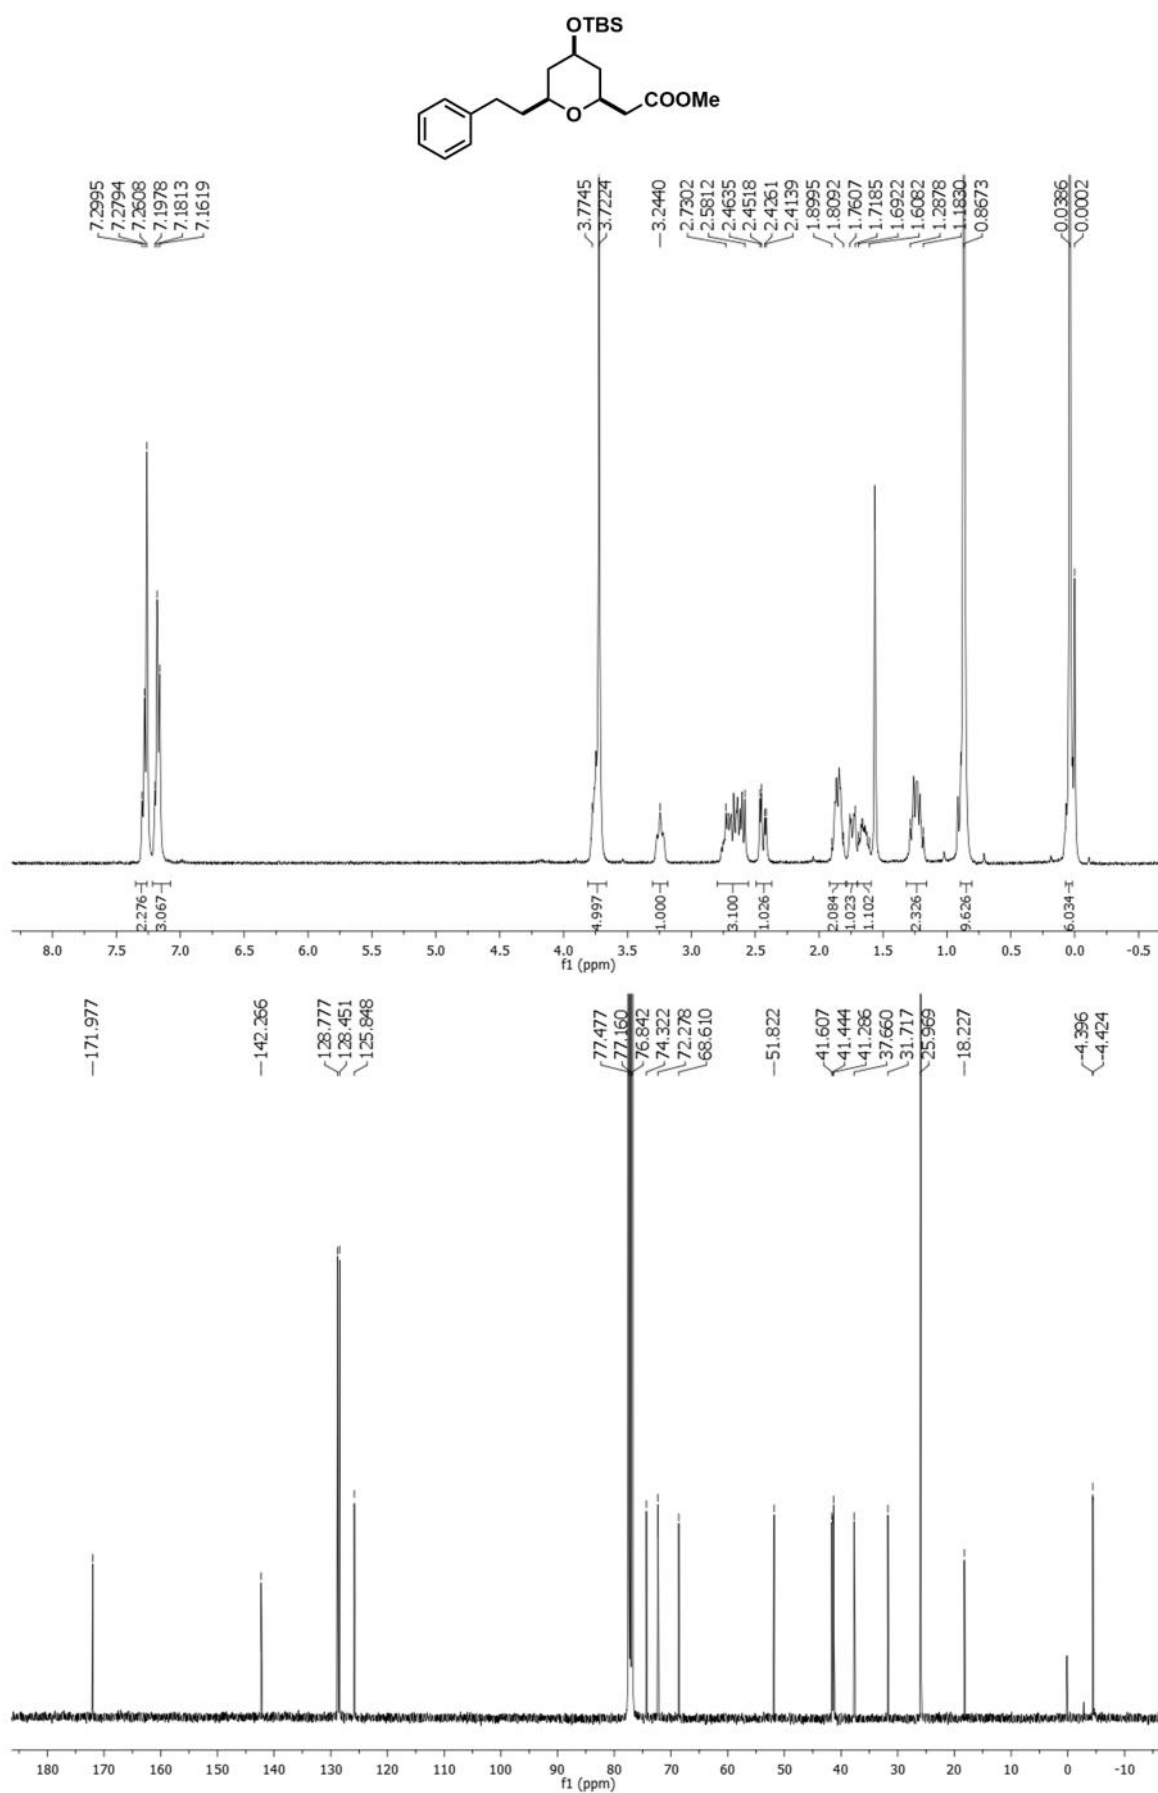

CC(C)(CO)OC(CC1=CC=CC=C1)C(=O)O[Si](C)(C)C(C)(C)C

**<sup>1</sup>H NMR (400 MHz, CDCl<sub>3</sub>)**

| Chemical Shift (ppm) |
|----------------------|
| 7.3010               |
| 7.2816               |
| 7.2511               |
| 7.2029               |
| 7.1885               |
| 7.1689               |
| 3.8541               |
| 3.8384               |
| 3.8262               |
| 3.8122               |
| 3.7612               |
| 3.7465               |
| 3.7343               |
| 3.7223               |
| 3.7075               |
| 3.5683               |
| 3.5630               |
| 3.5600               |
| 3.5554               |
| 3.5462               |
| 3.5396               |
| 3.5343               |
| 3.5273               |
| 3.5176               |
| 3.5138               |
| 3.5098               |
| 3.5053               |
| 3.3054               |
| 3.2890               |
| 3.2719               |
| 3.2611               |
| 2.7829               |
| 2.7718               |
| 2.6552               |
| 2.6422               |
| 2.6204               |
| 1.9215               |
| 1.6823               |
| 1.3832               |
| 1.2152               |
| 0.8756               |
| 0.0465               |

**<sup>13</sup>C NMR (100 MHz, CDCl<sub>3</sub>)**

| Chemical Shift (ppm) |
|----------------------|
| 141.918              |
| 128.625              |
| 128.524              |
| 125.970              |
| 76.211               |
| 74.925               |
| 68.557               |
| 61.681               |
| 41.822               |
| 41.619               |
| 37.887               |
| 37.676               |
| 31.945               |
| 25.974               |
| 18.240               |
| 4.388                |

# Compounds **11c**

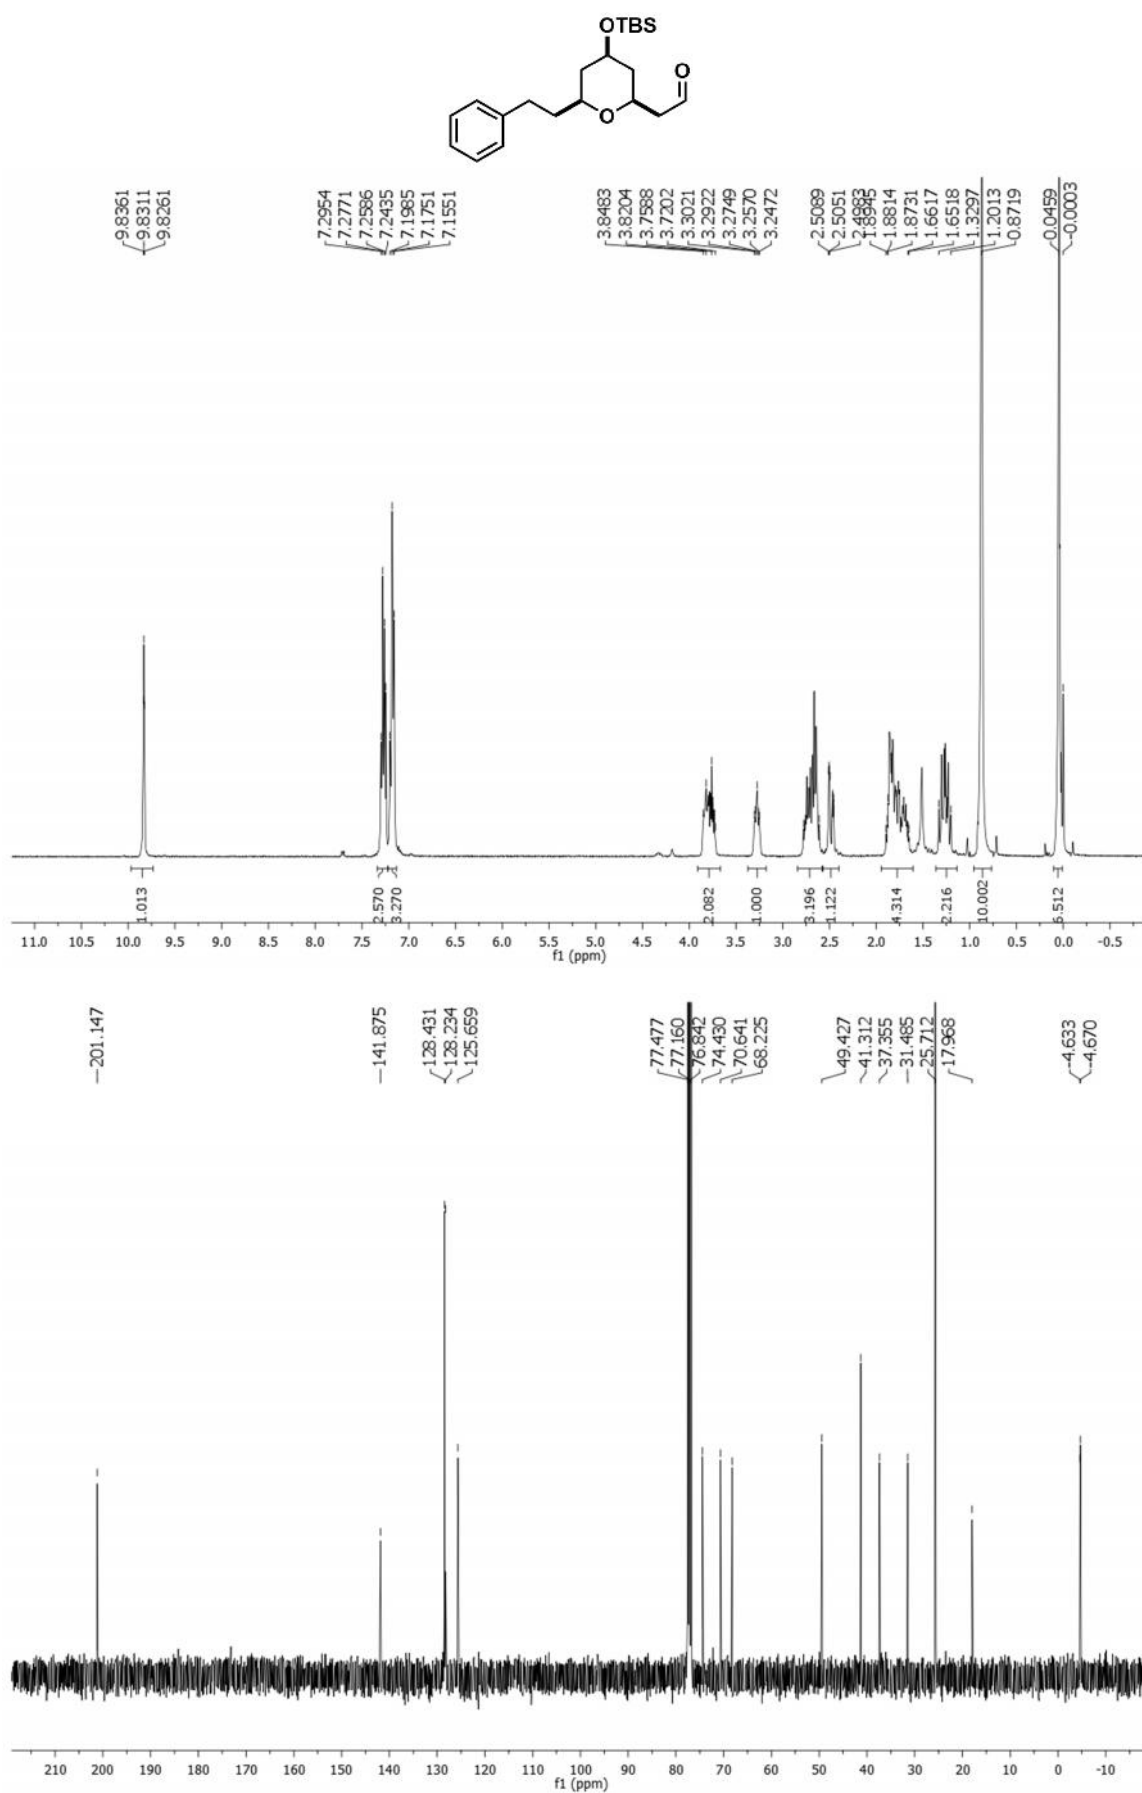



Compounds **12c**

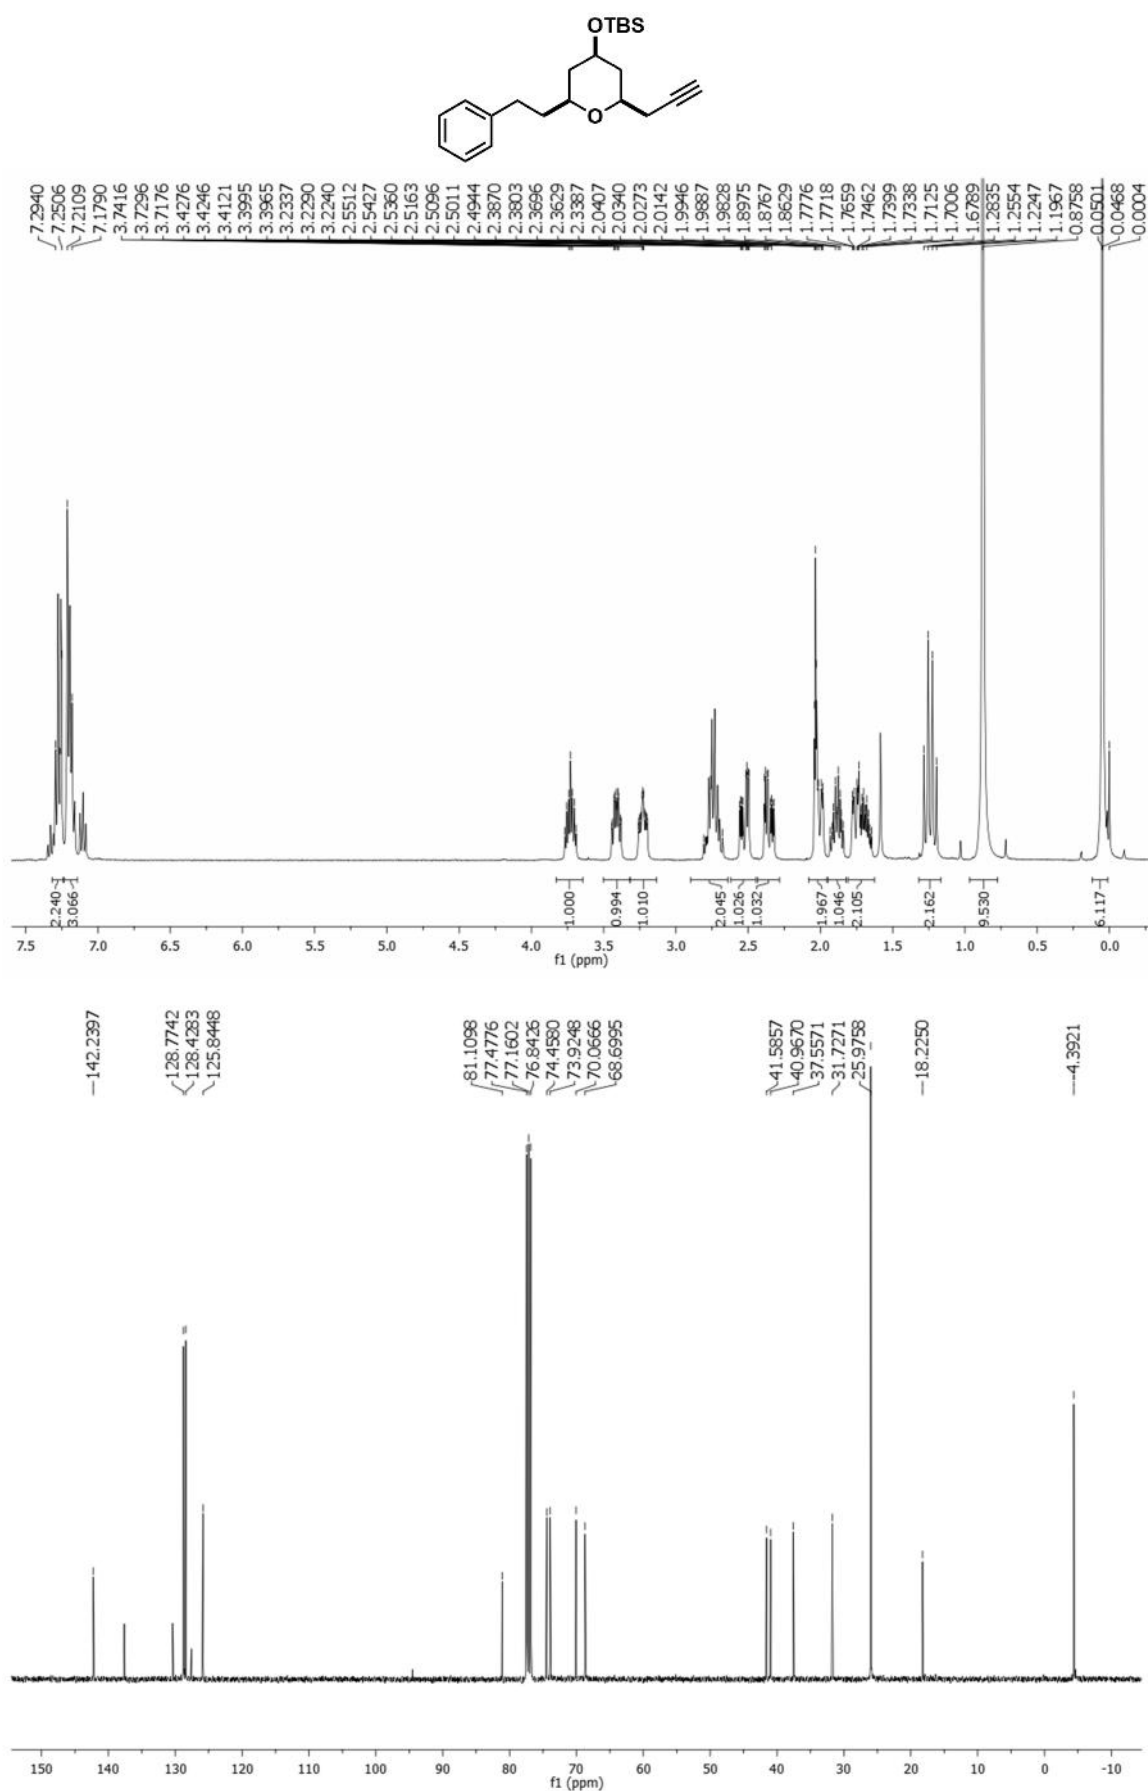

Compounds **8d**

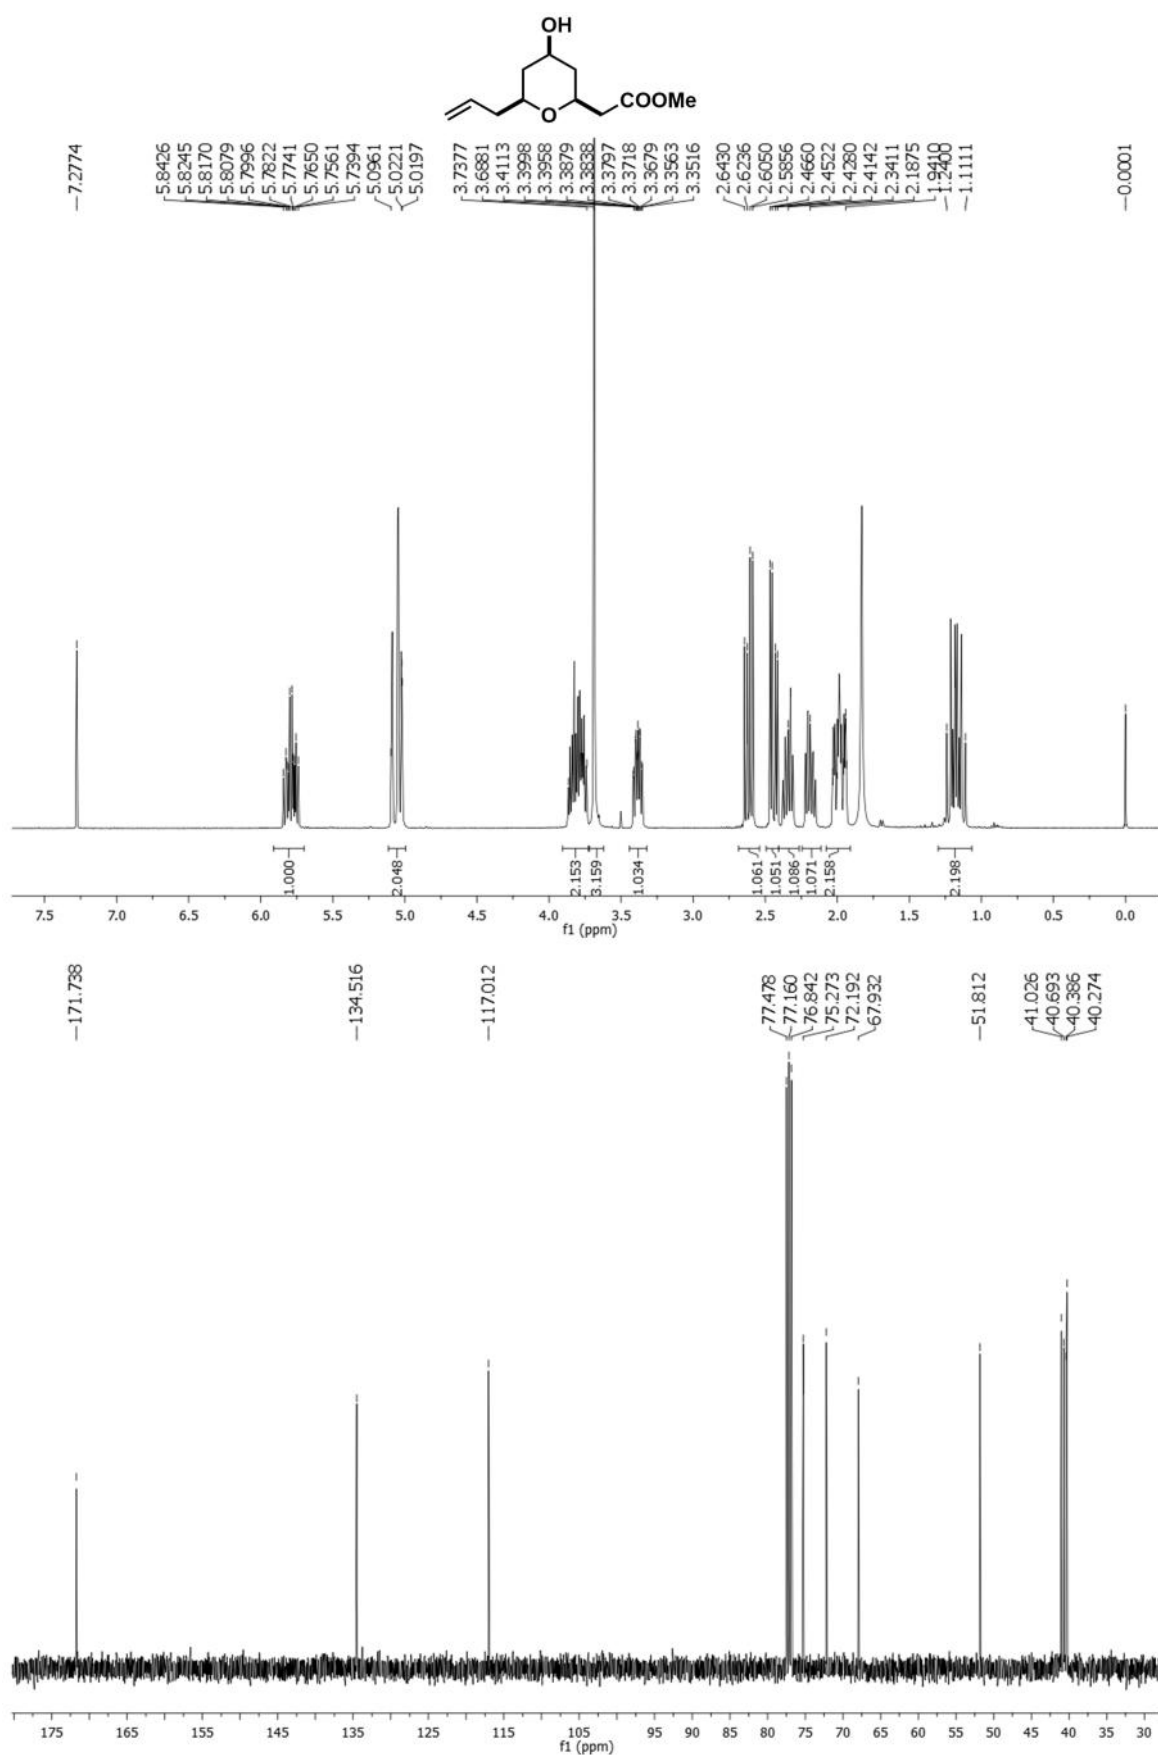

Compounds **9d**

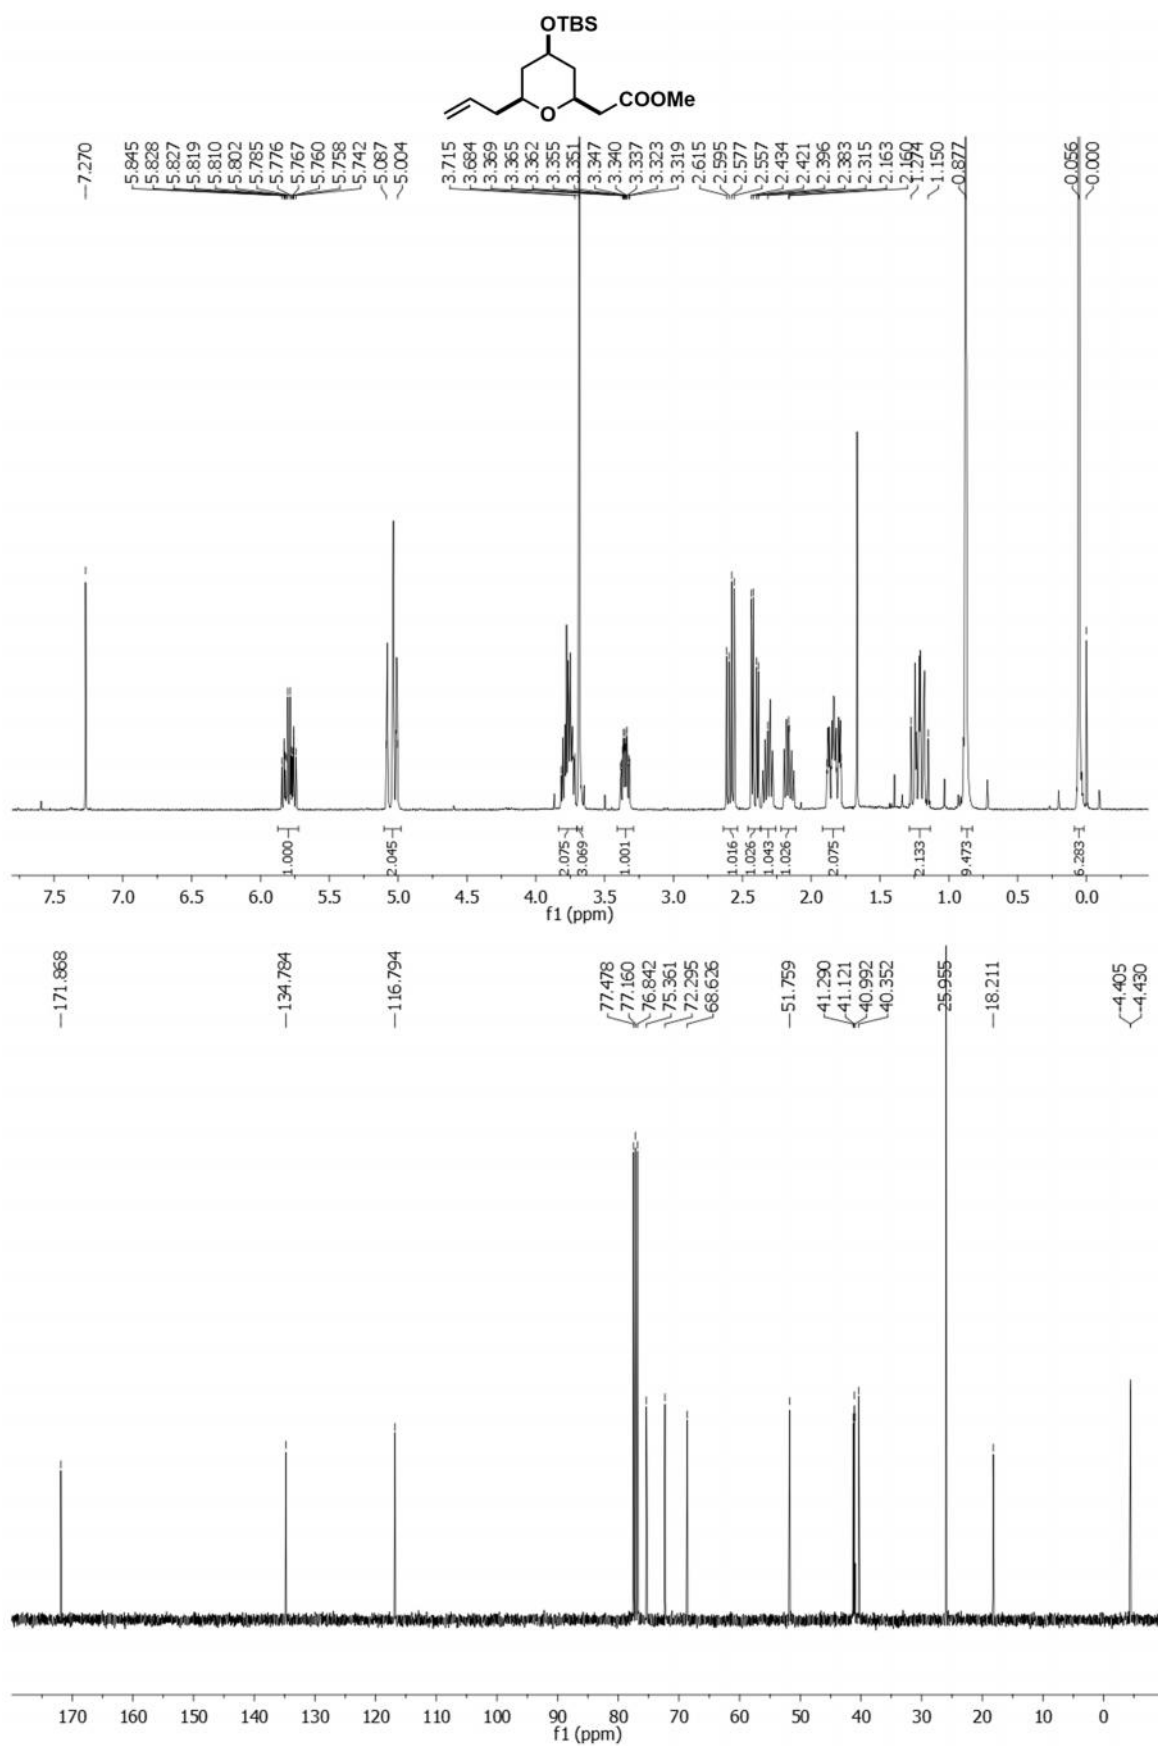

Compounds **10d**

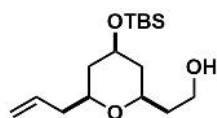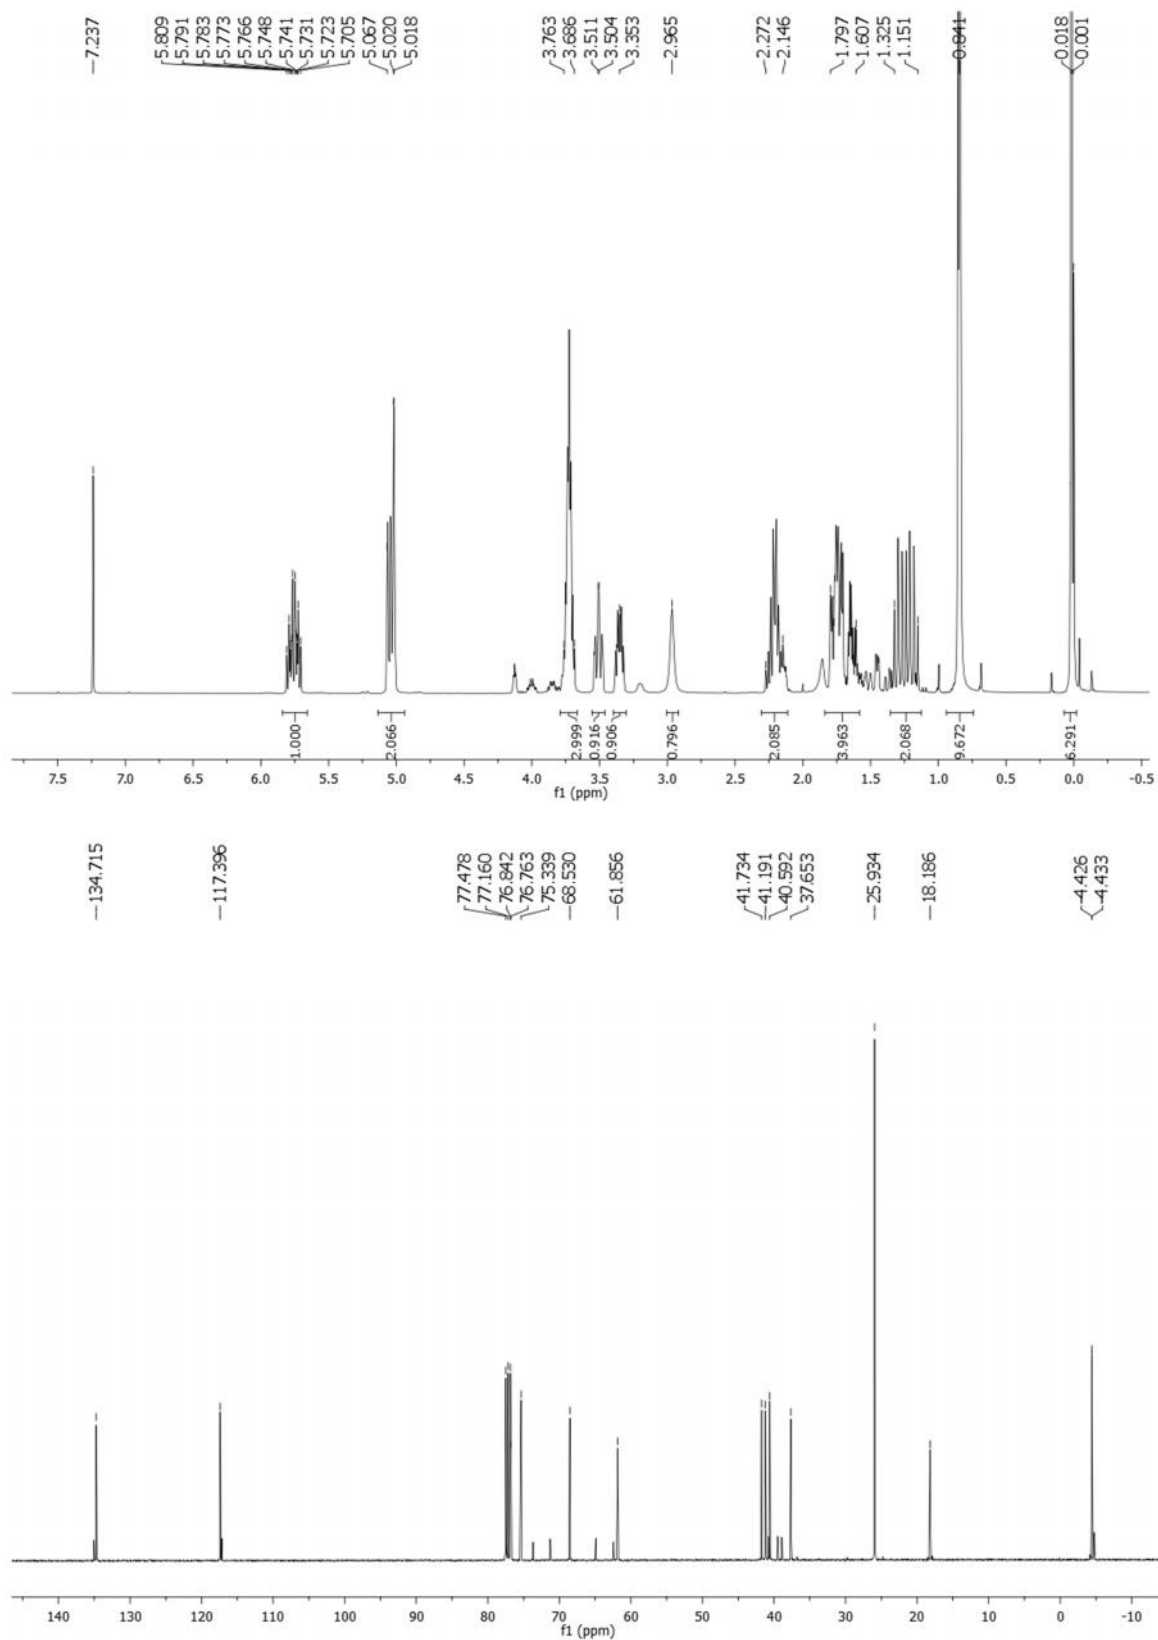

Compounds **11d**

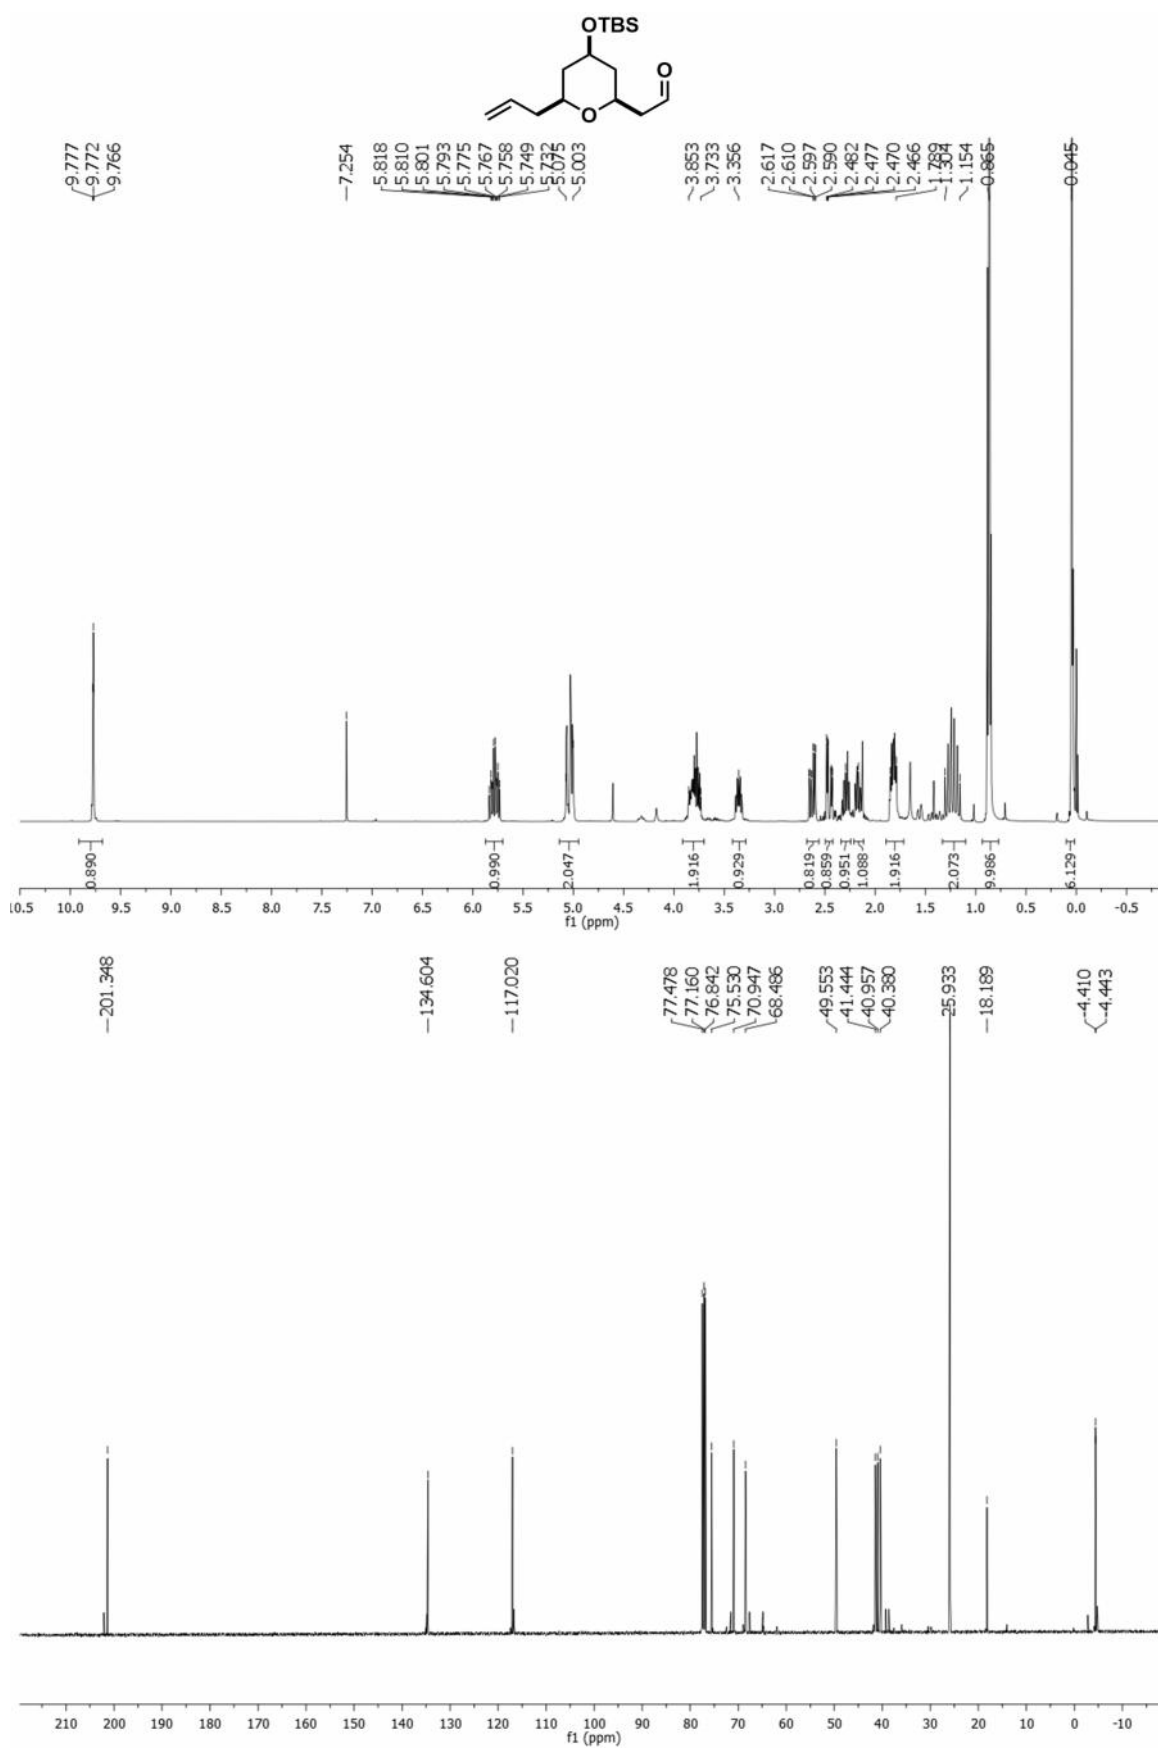

Compounds **12d**

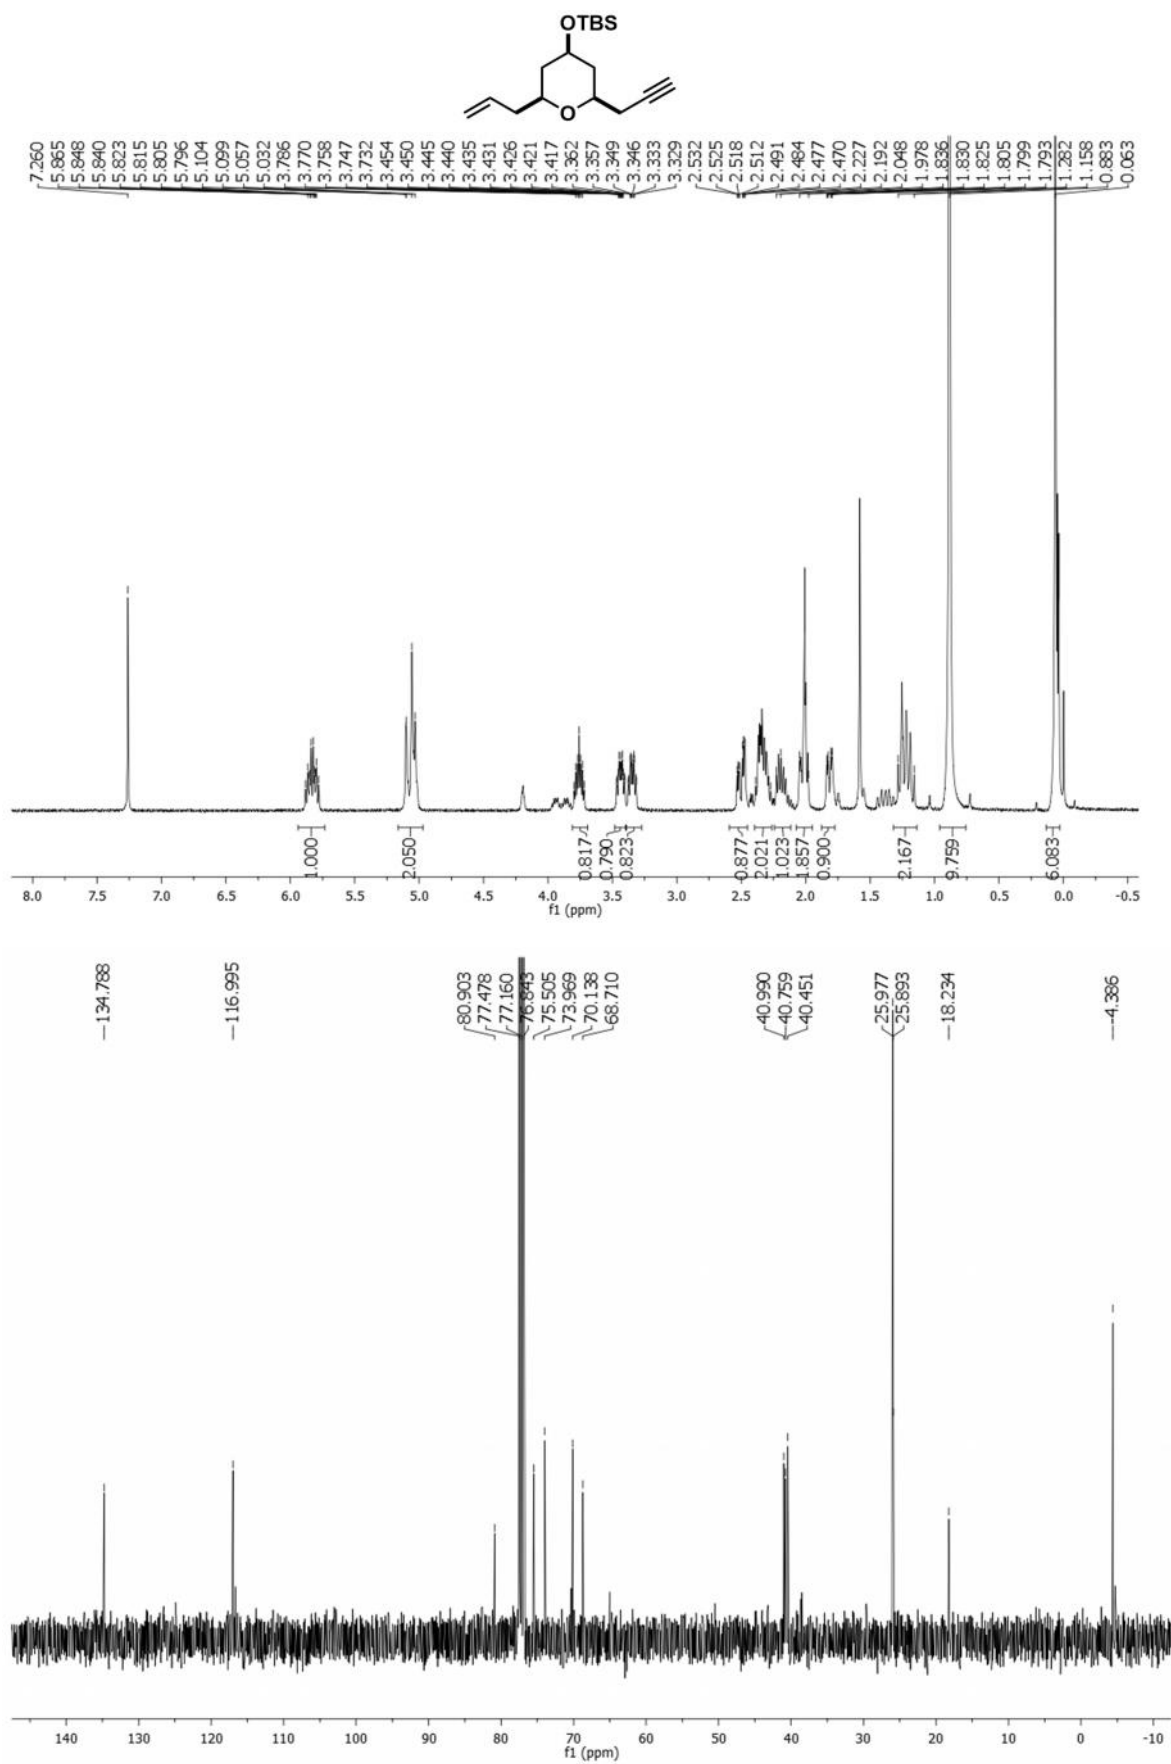

Compounds **14a**

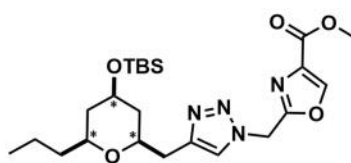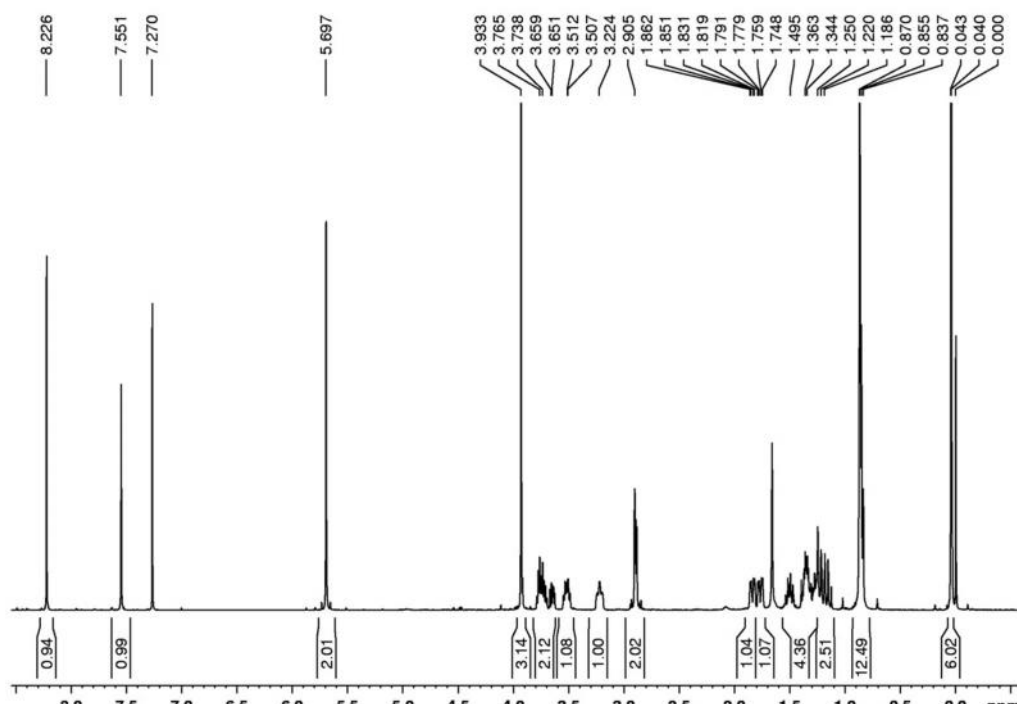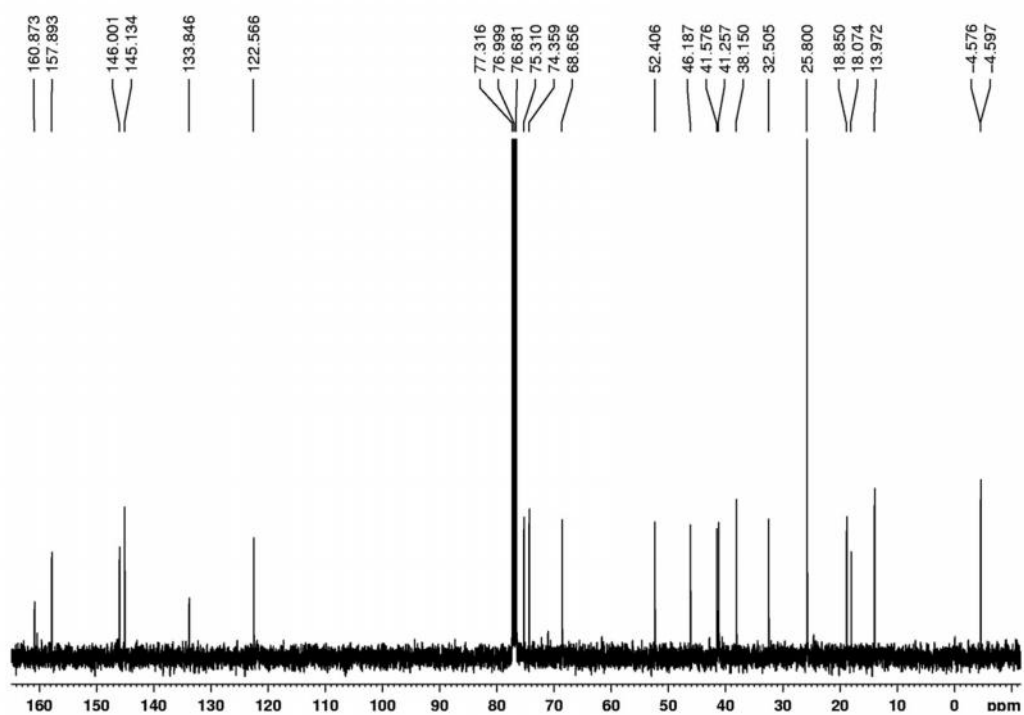

# Compounds **14b**

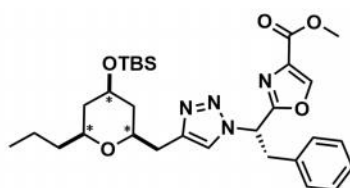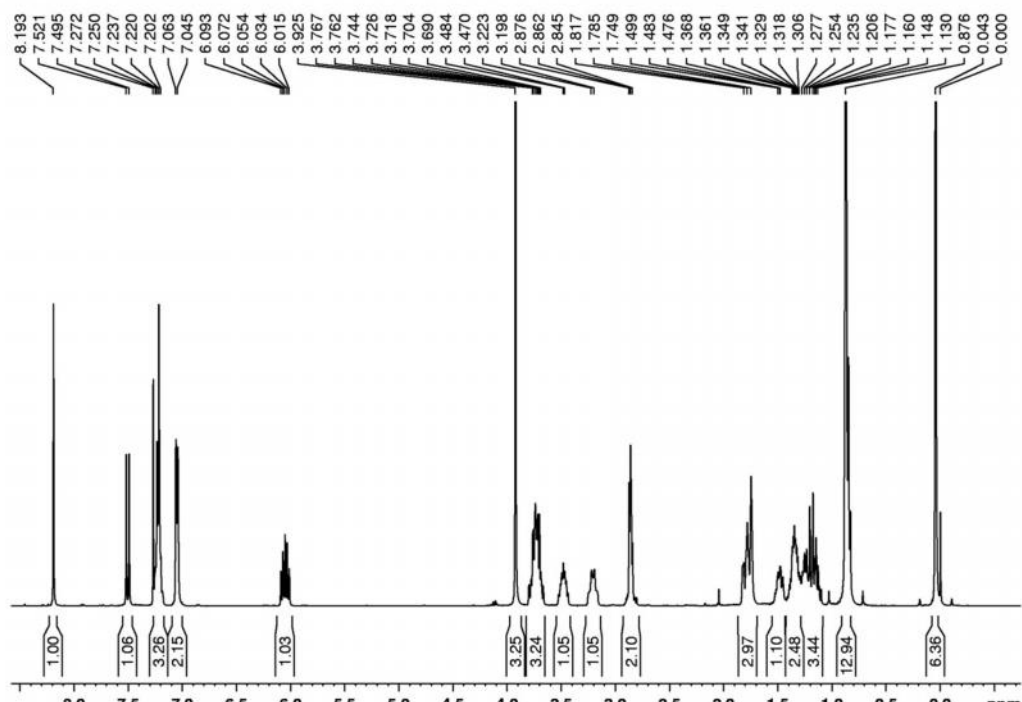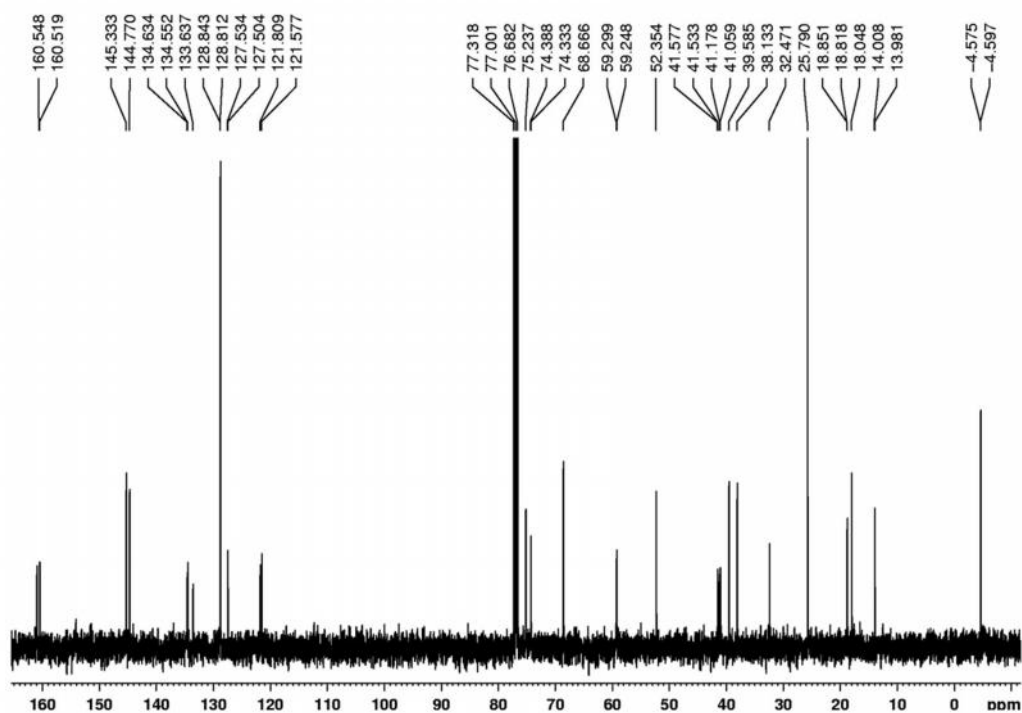



Compounds **14c**

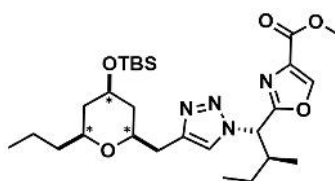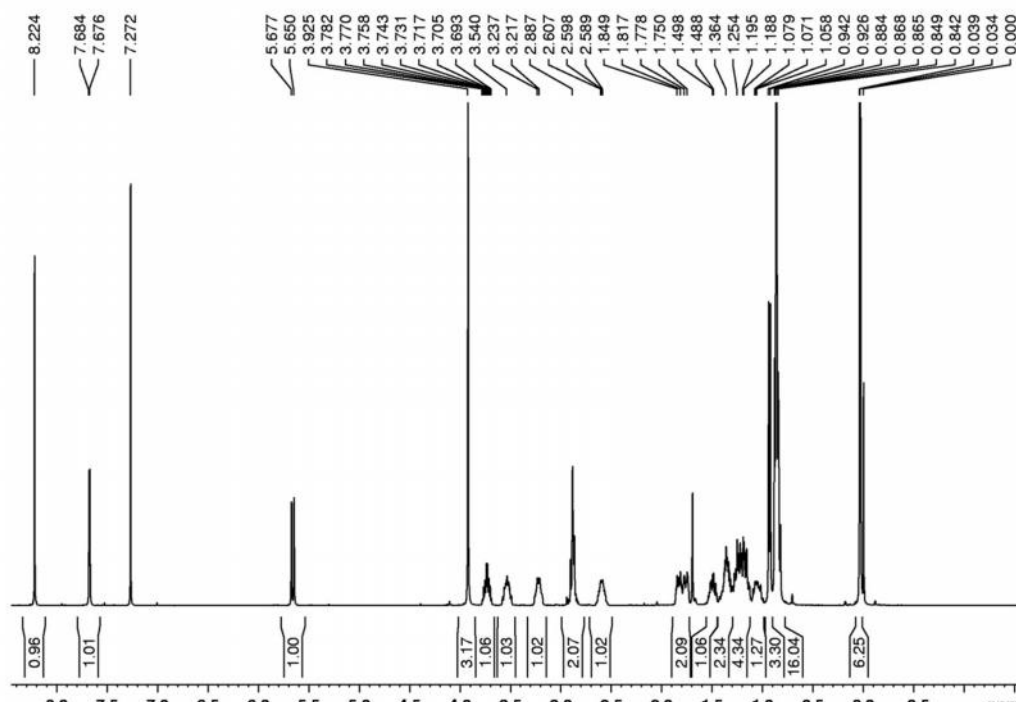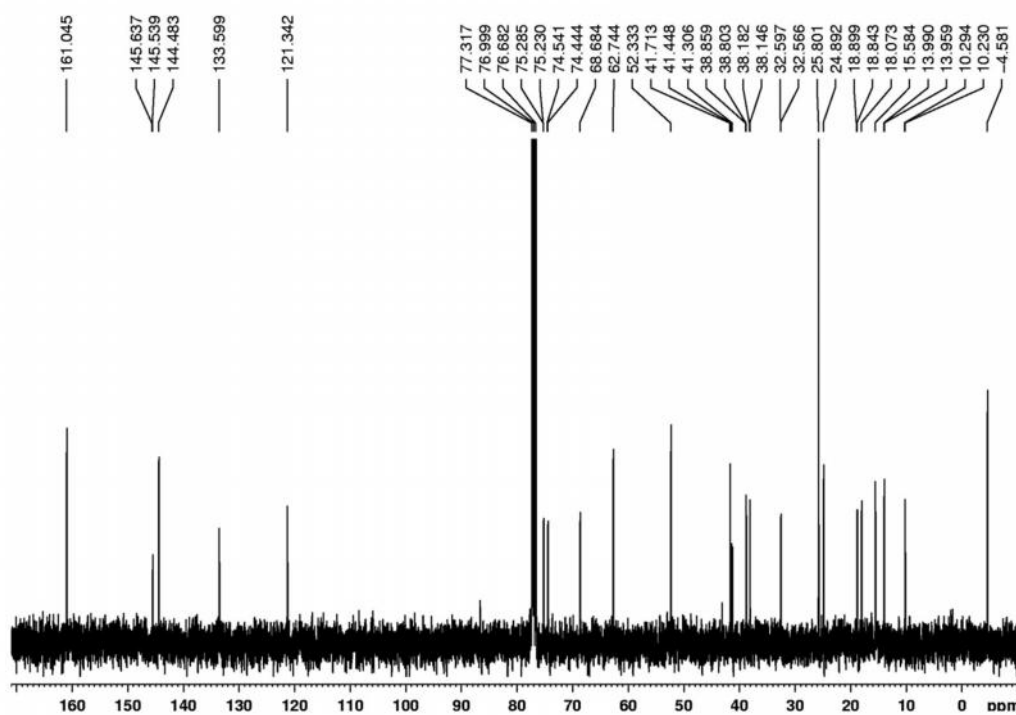

Compounds **14d**

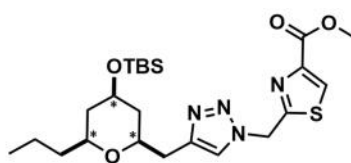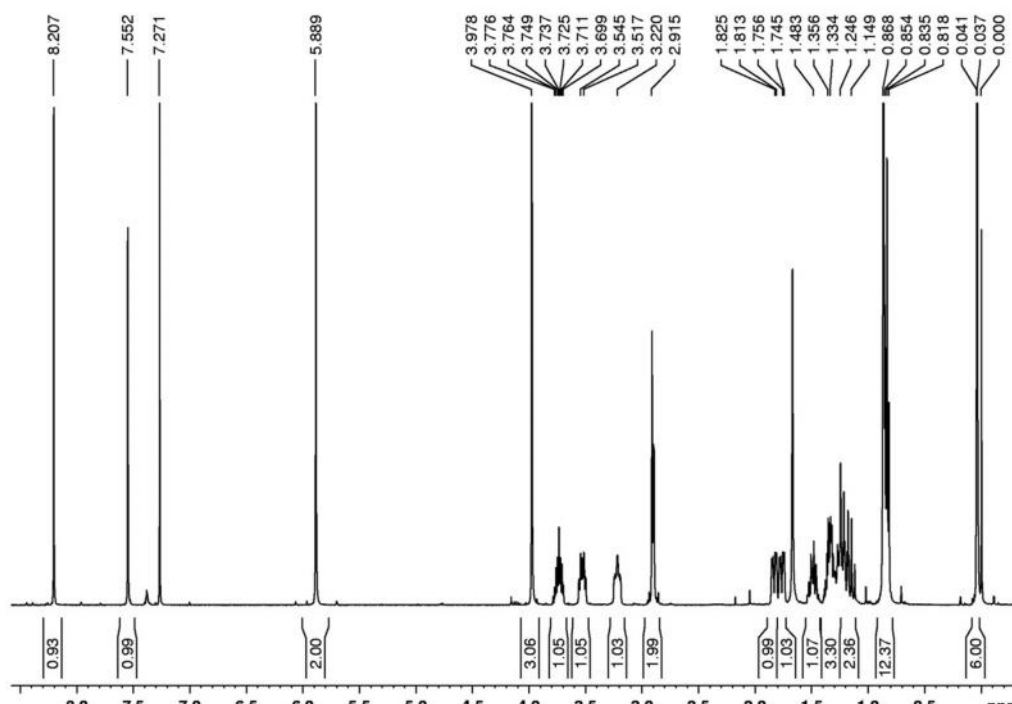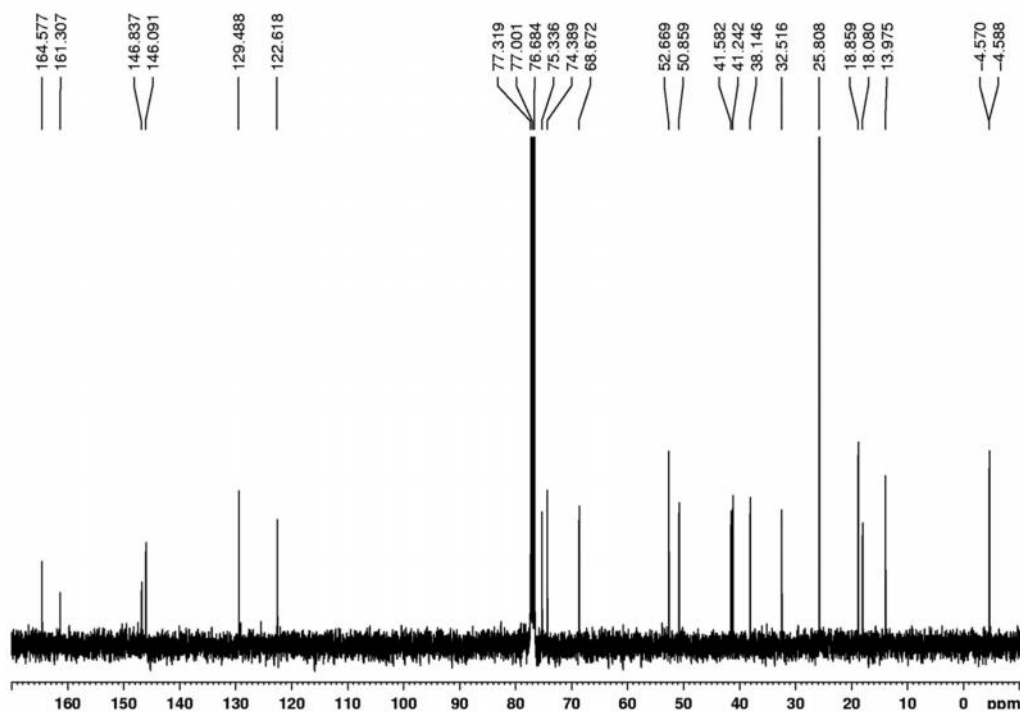

Compounds **14e**

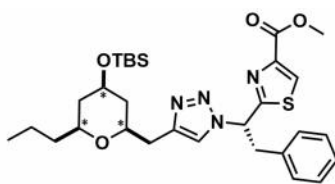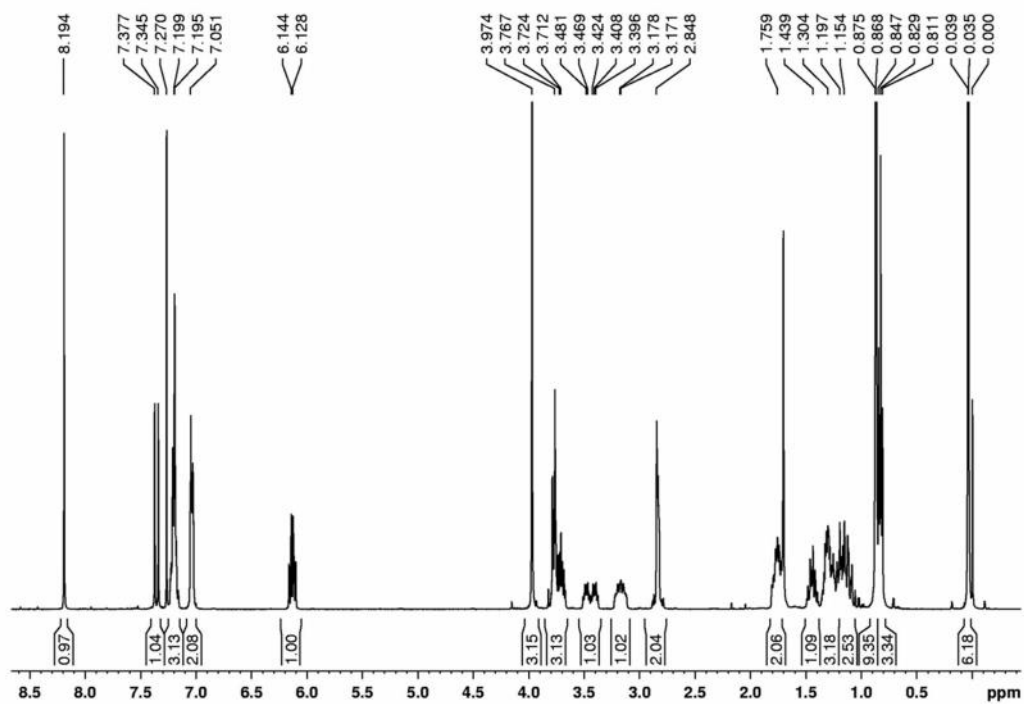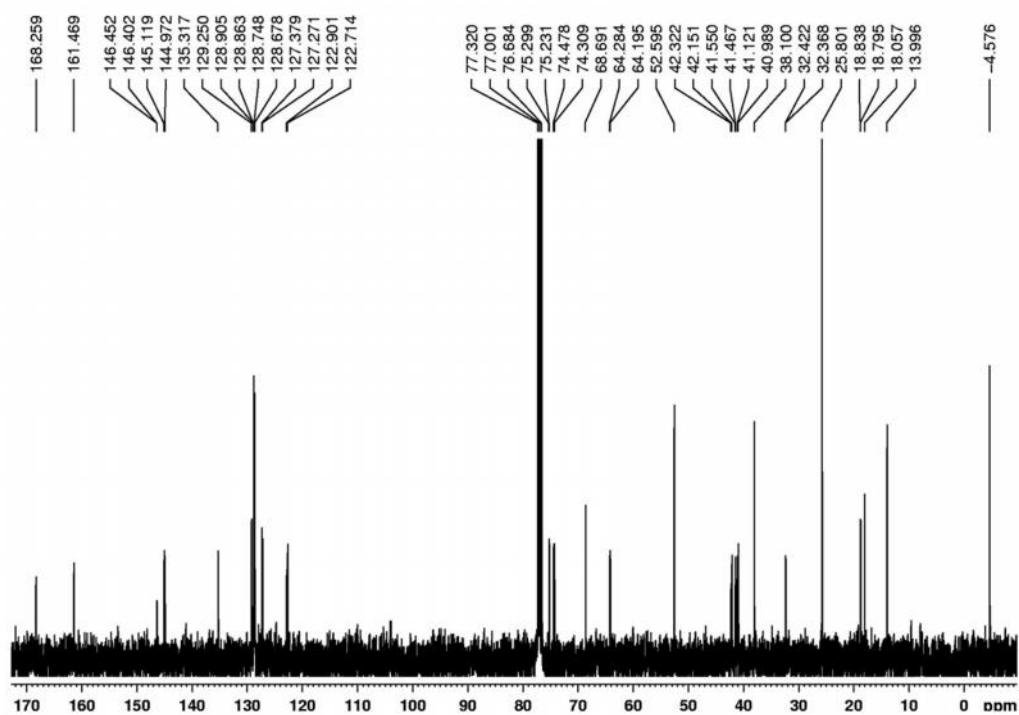

Compounds **14f**

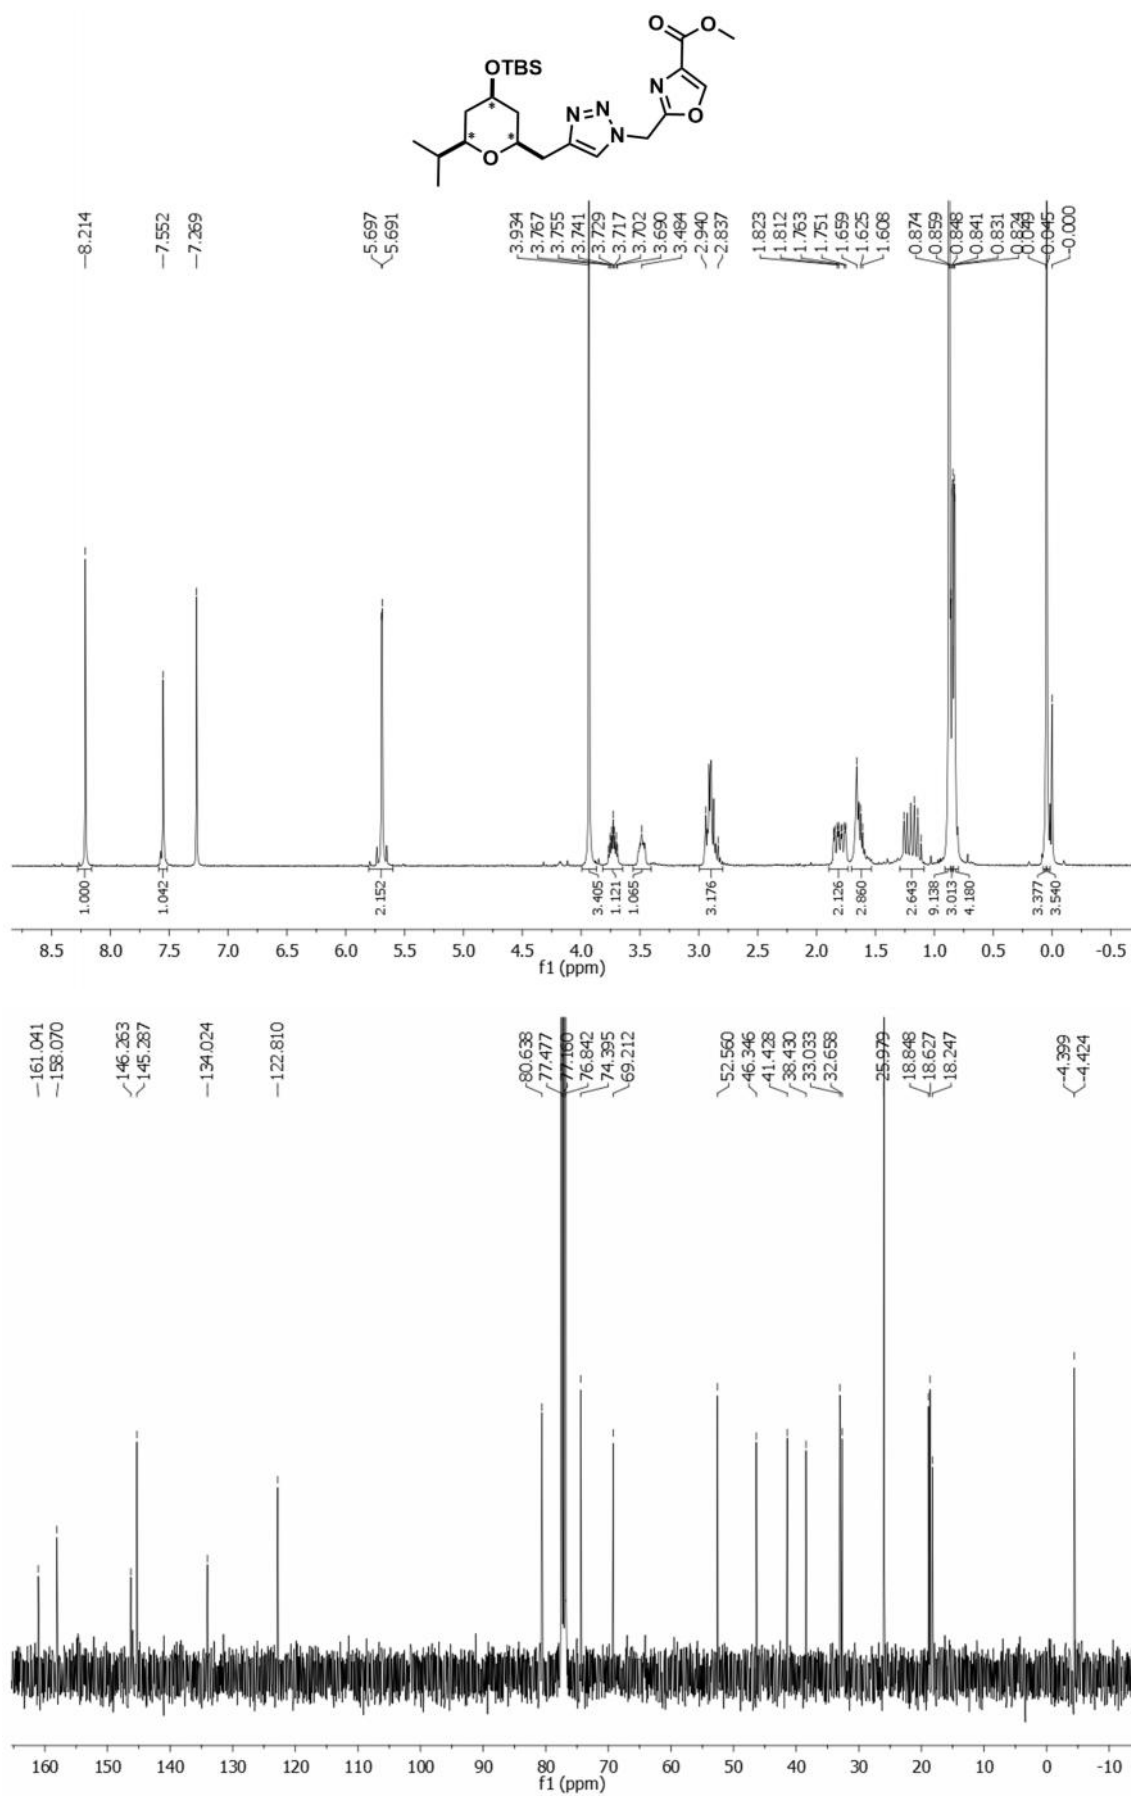

Compounds **14g**

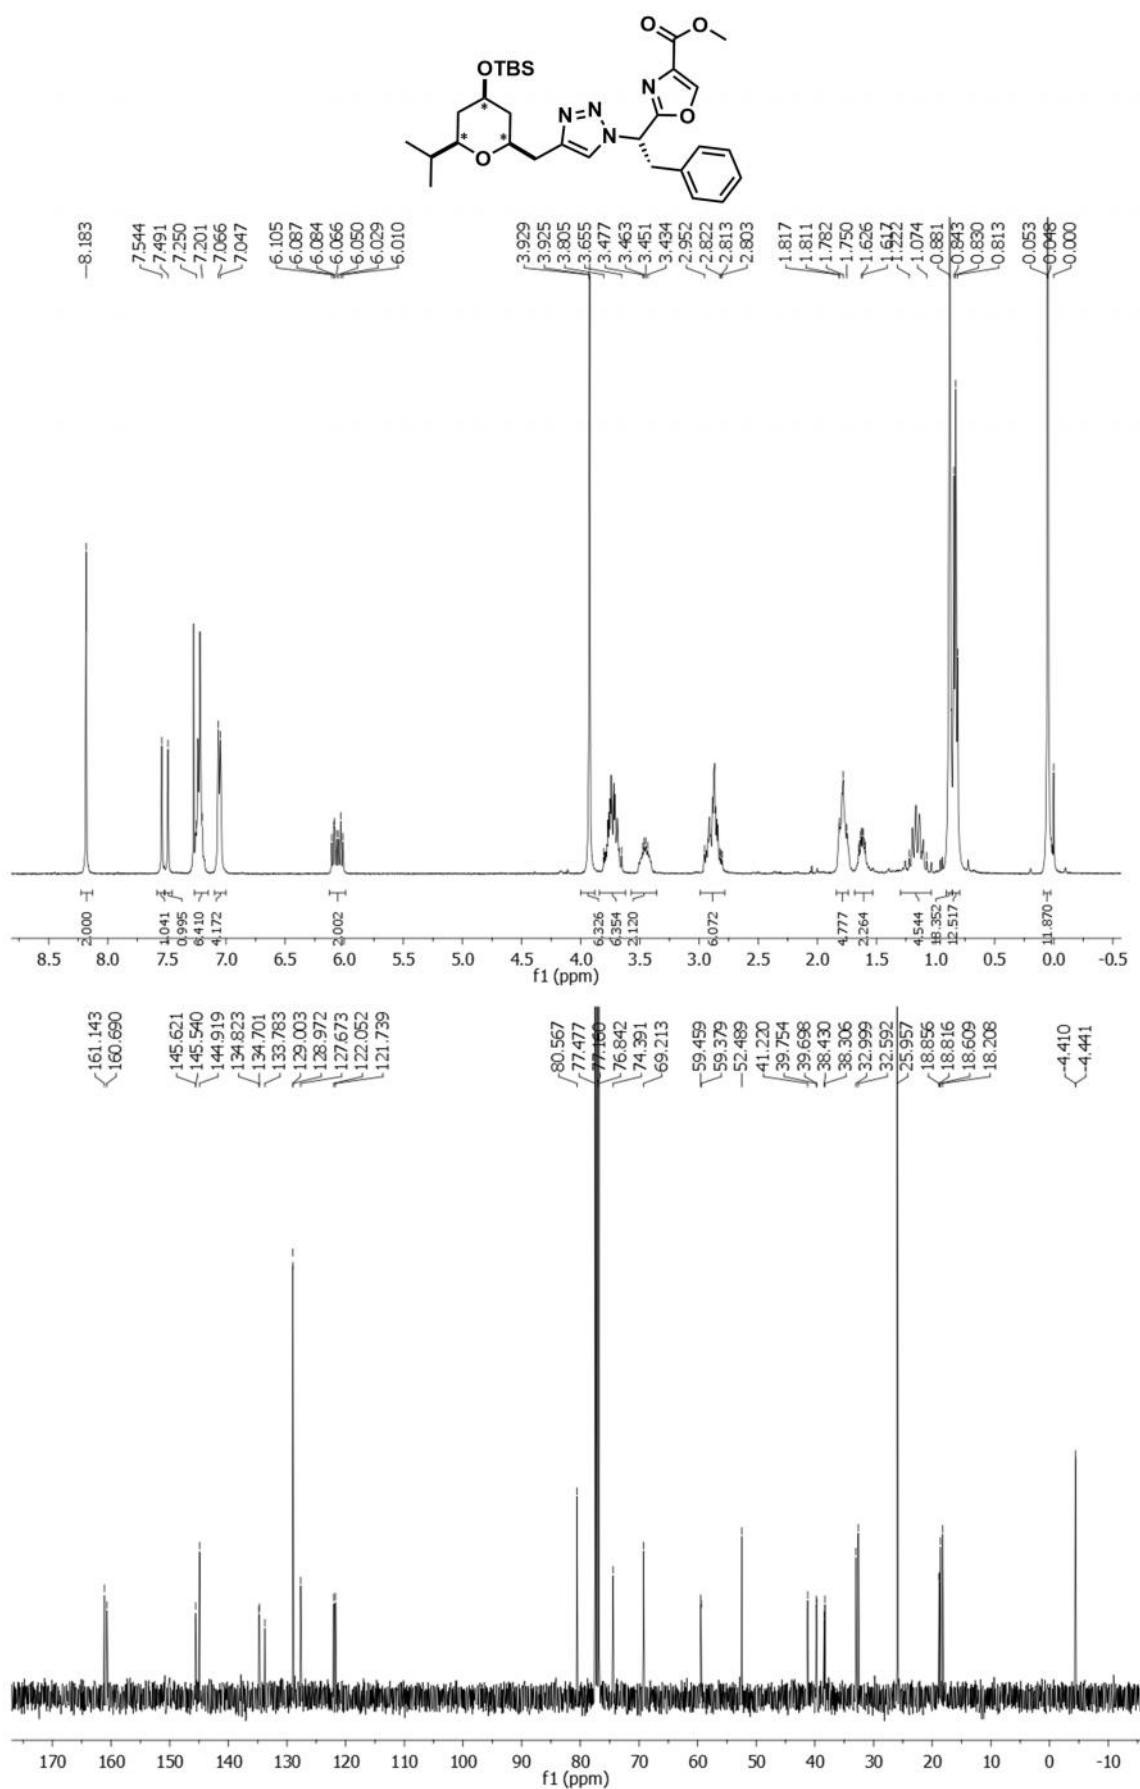

Compounds **14h**

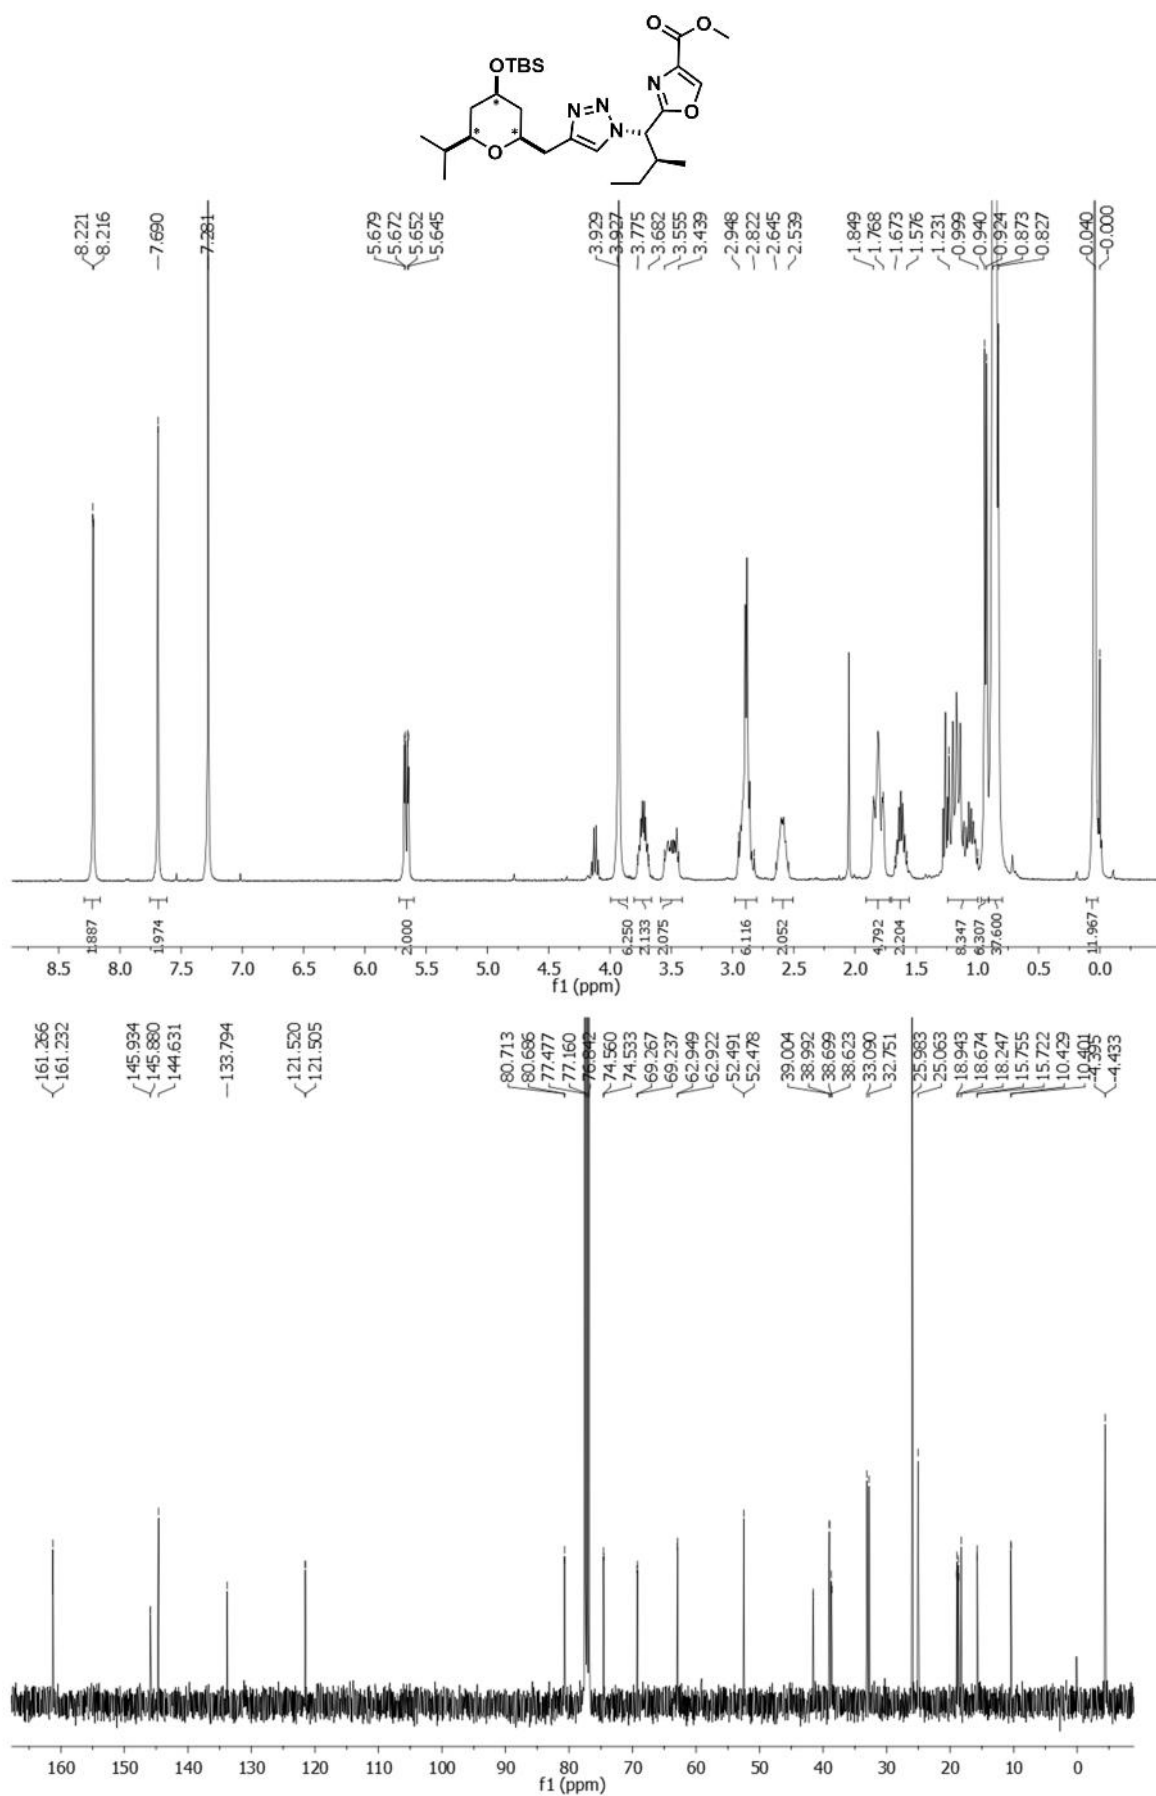

Compounds **14i**

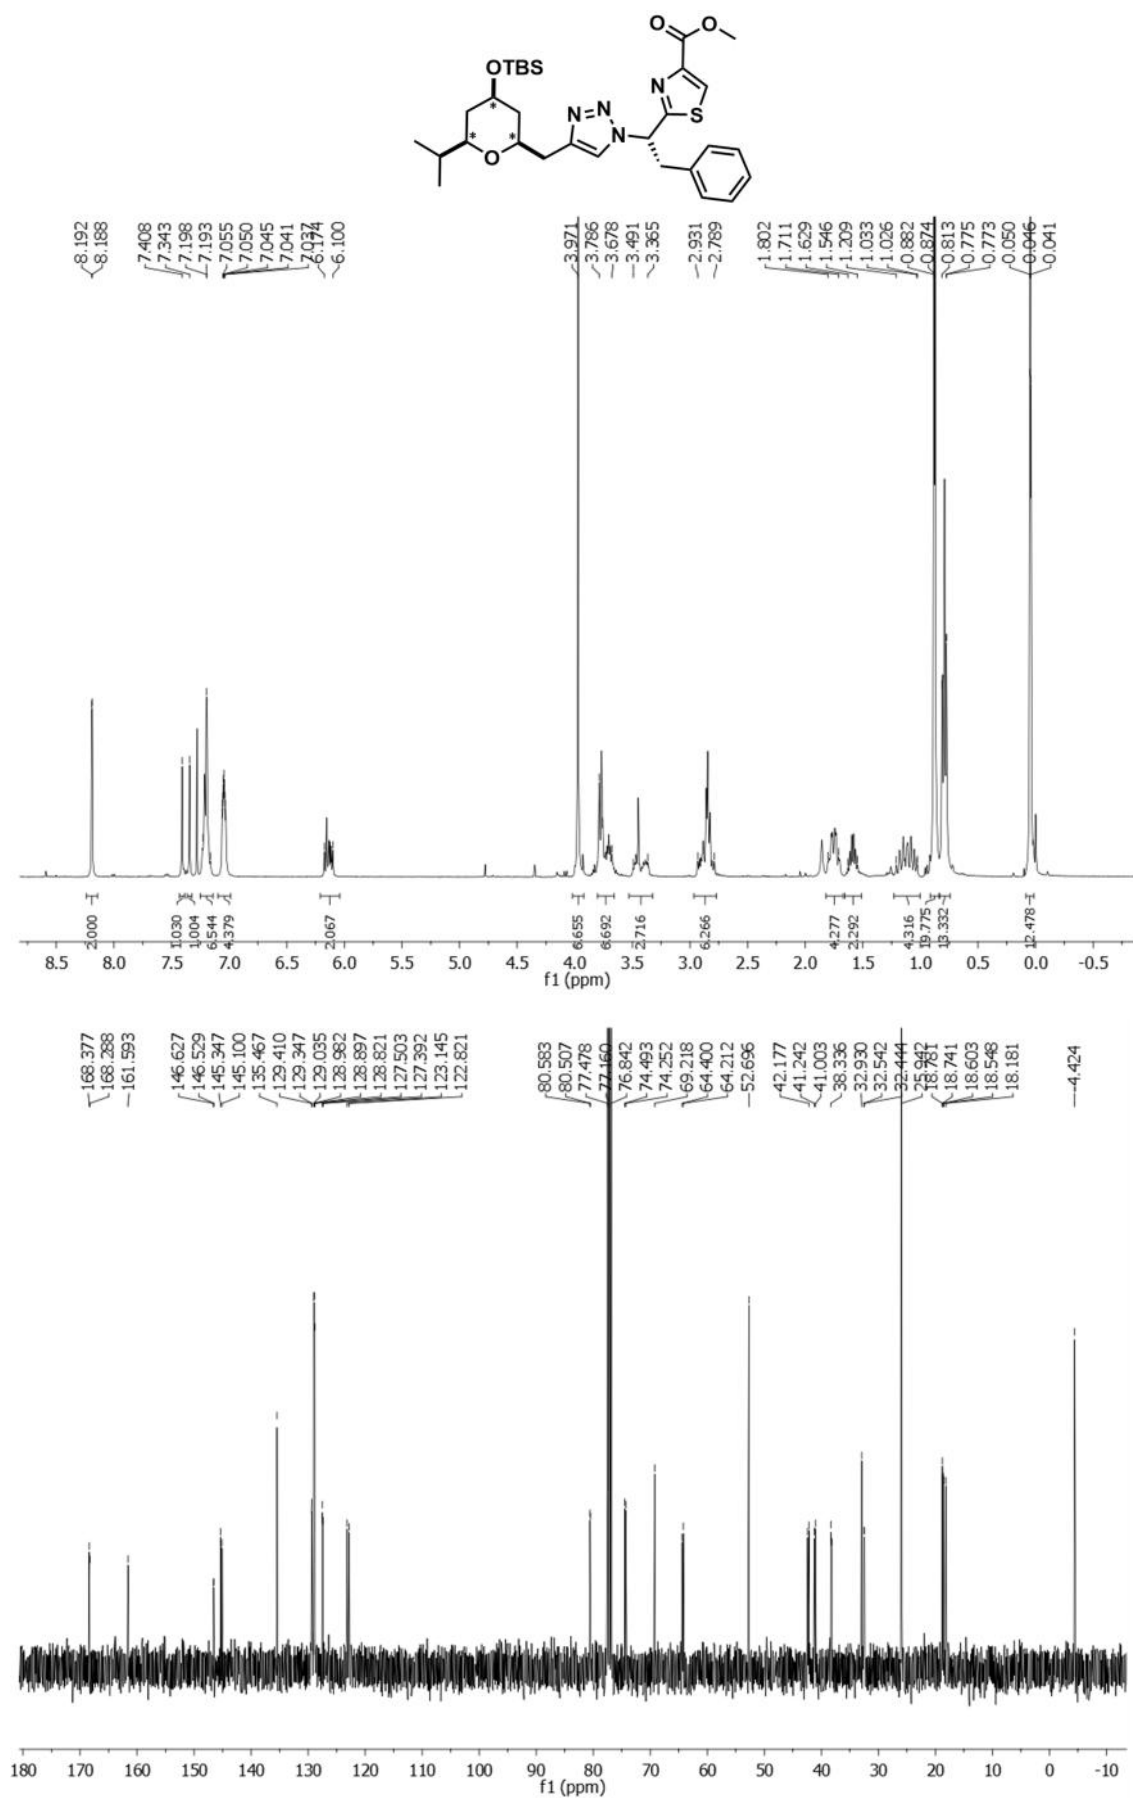

Compounds **14j**

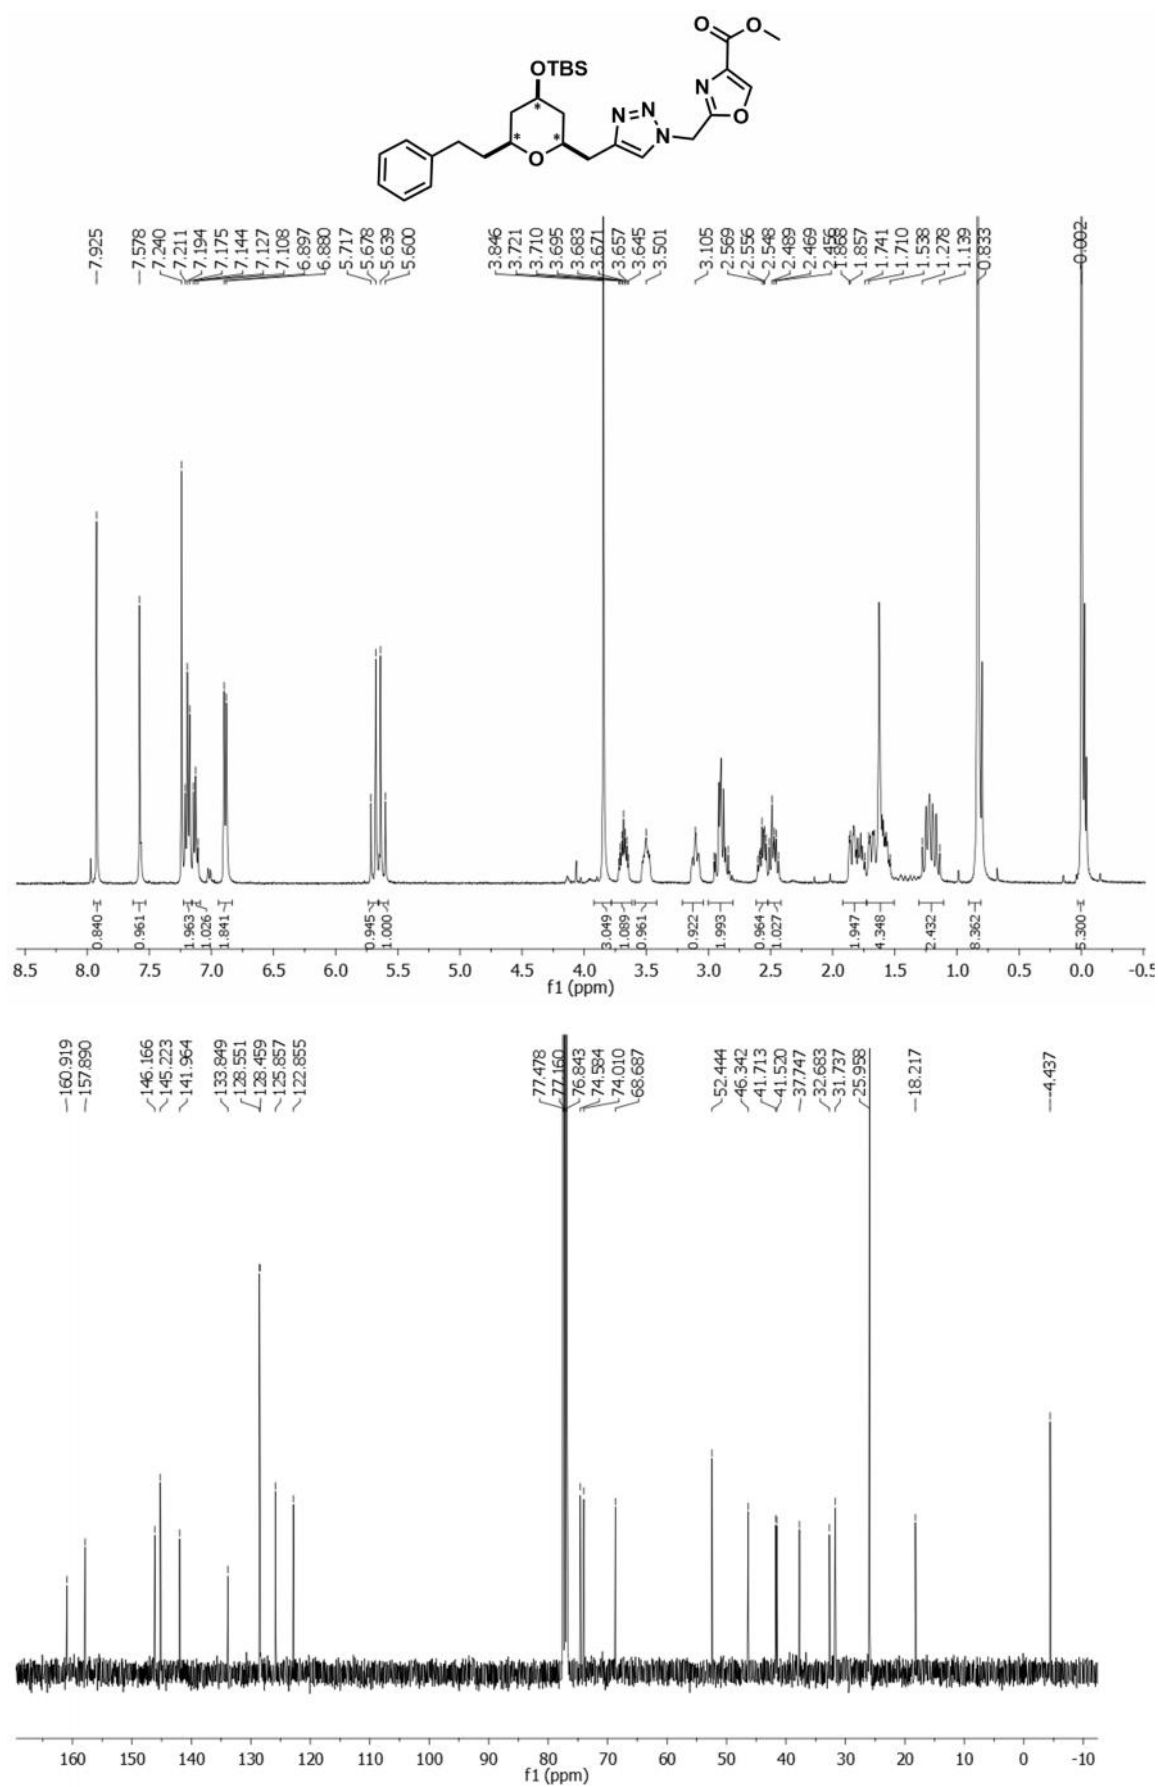



Compounds **14k**

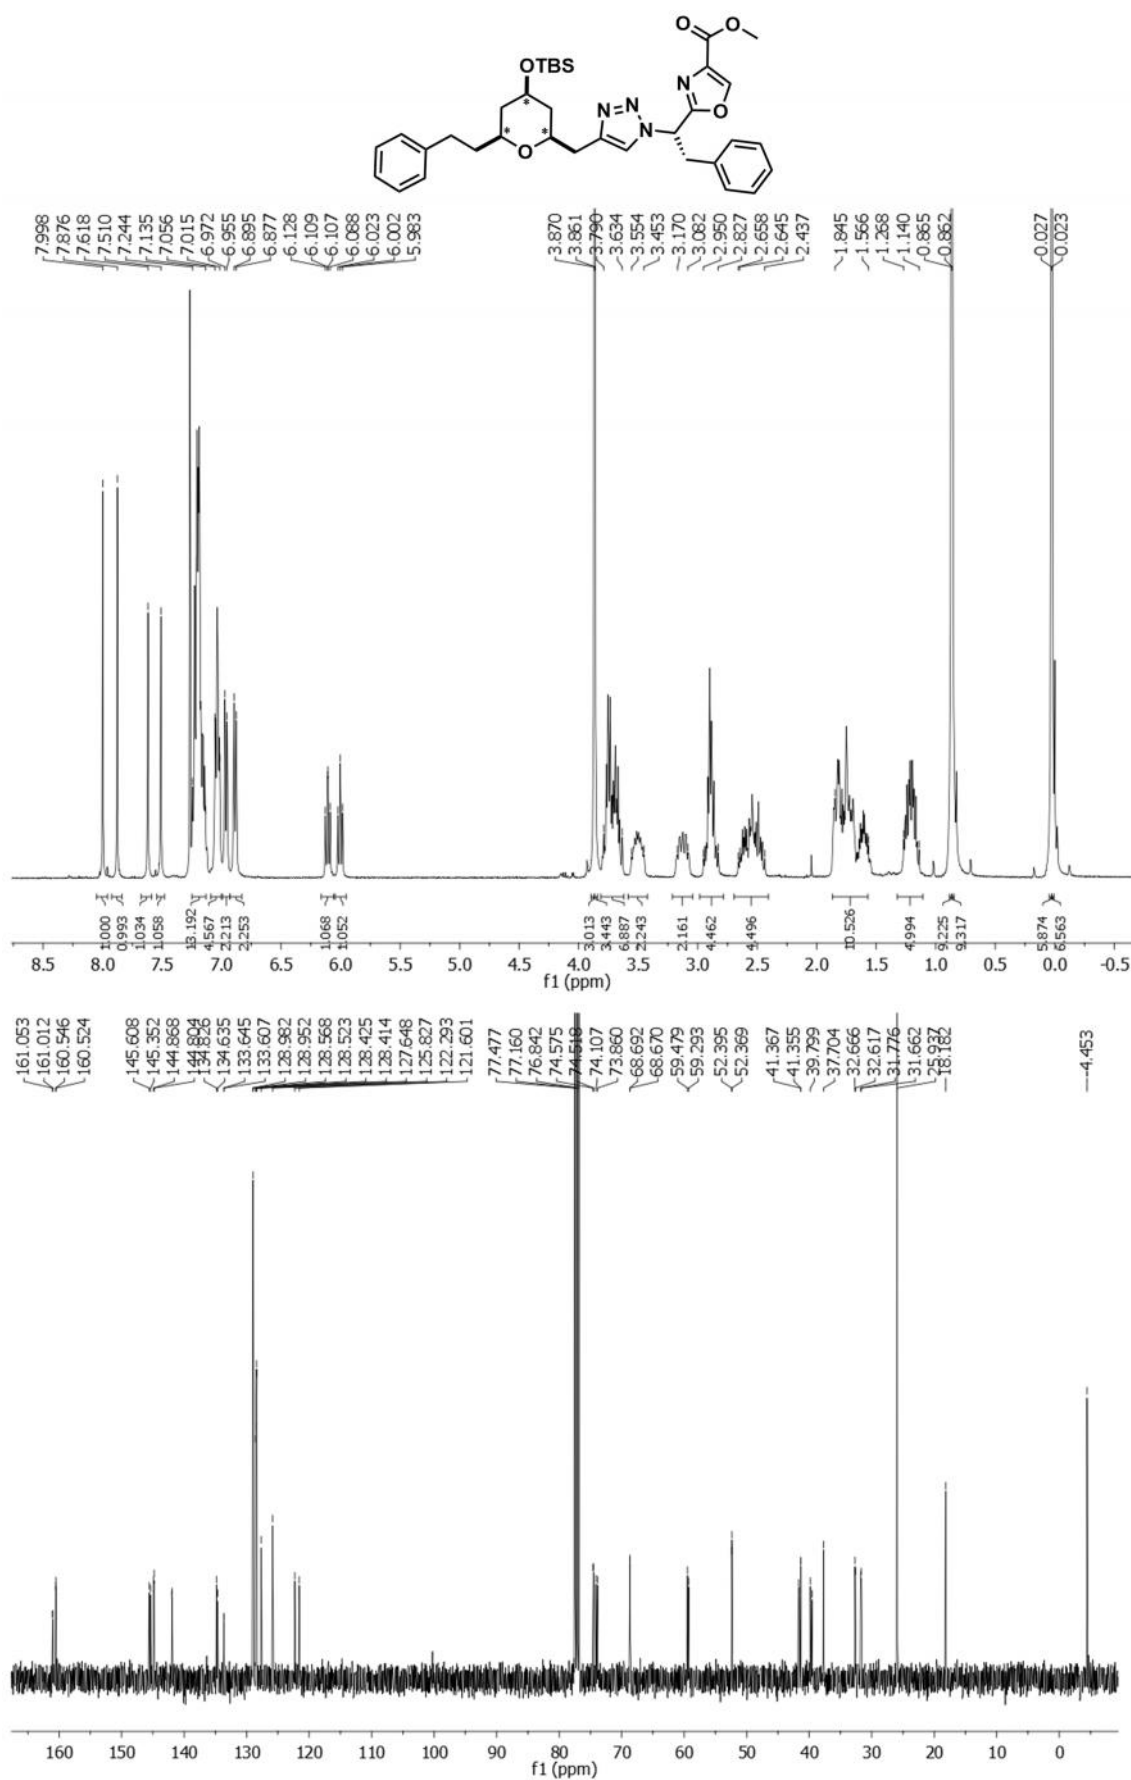

Compounds **14l**

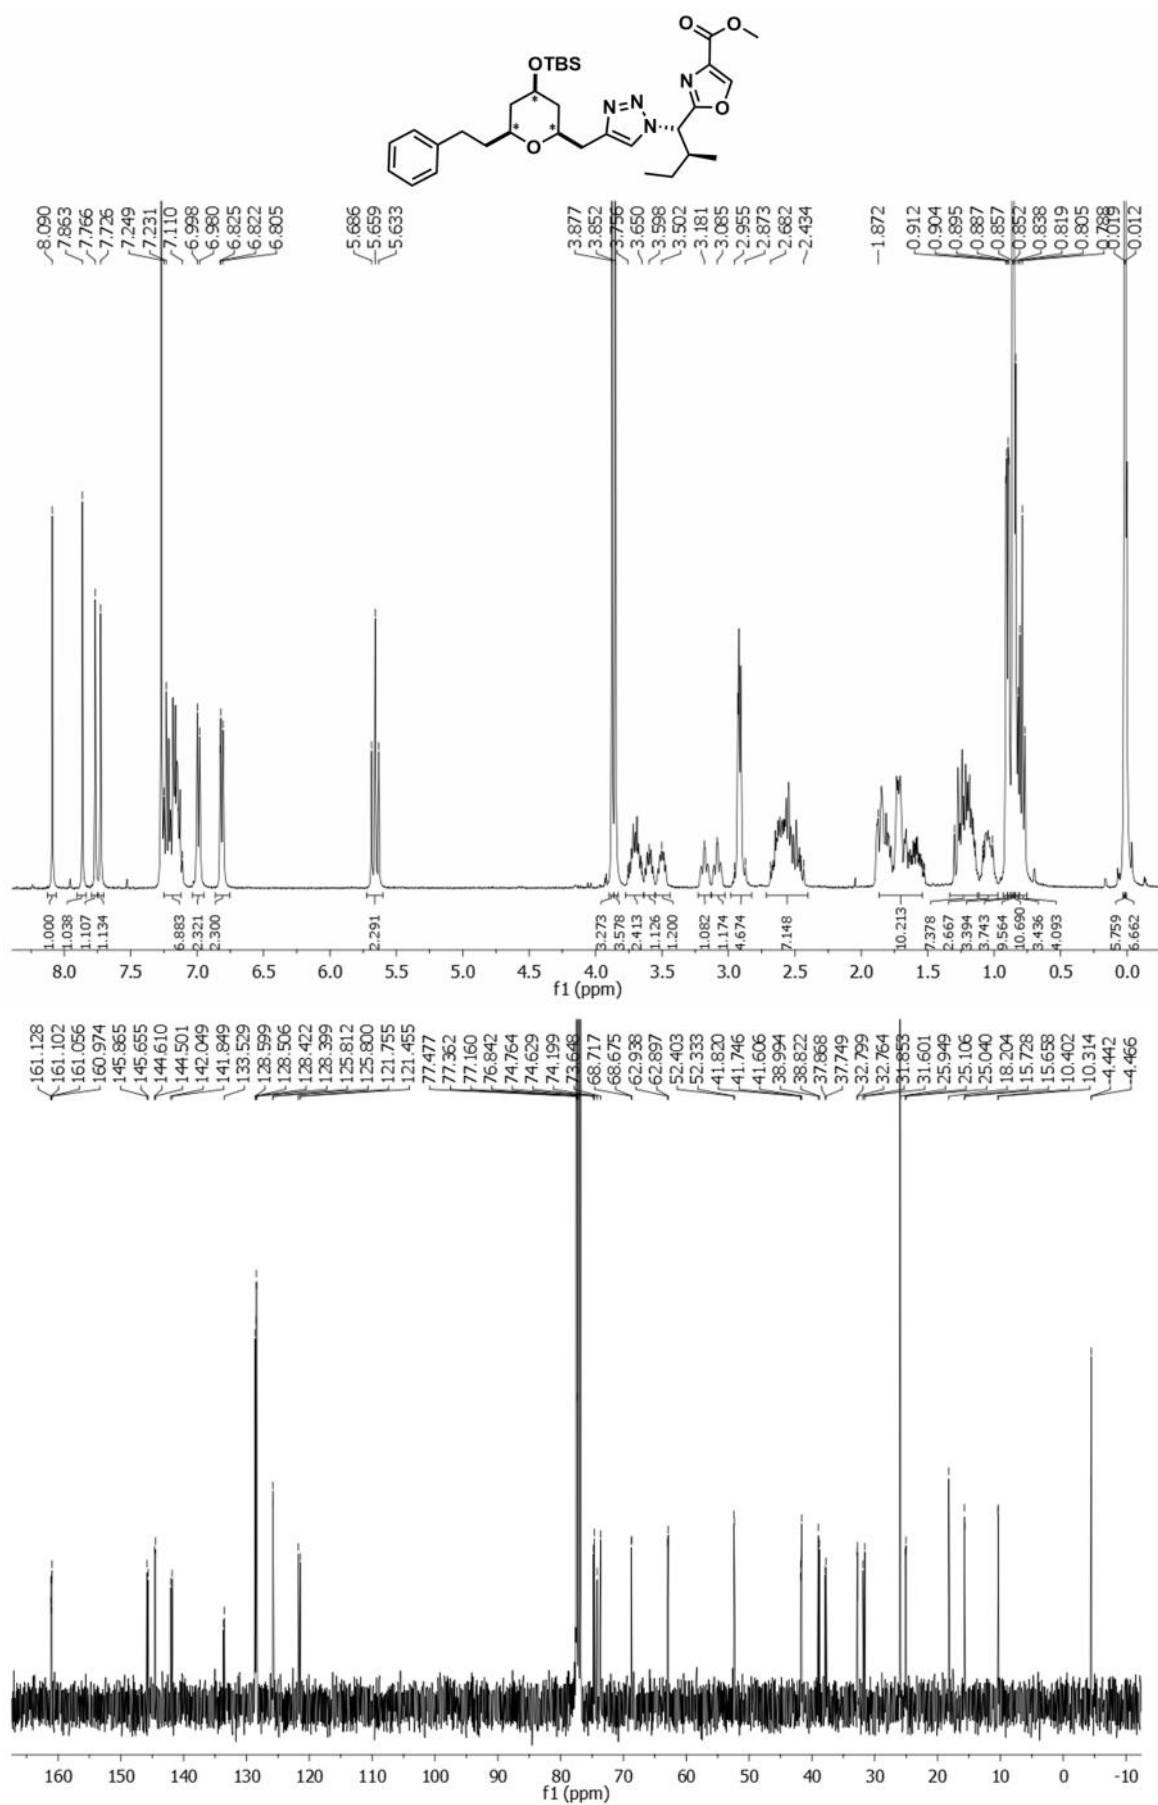

CCOC(=O)c1cc(s1)C[C@H](c1ccccc1)n2cc(C[C@@H]3O[C@H](CCc4ccccc4)[C@H](OC(C)(C)C)O3)nn2

**<sup>1</sup>H NMR (400 MHz, CDCl<sub>3</sub>)**

Chemical structure of the compound is shown above the spectrum.

Peak list (ppm): 8.051, 7.462, 7.369, 7.239, 7.136, 7.051, 7.028, 6.964, 6.959, 6.956, 6.939, 6.189, 6.102, 3.936, 3.924, 3.840, 3.652, 3.532, 3.441, 3.168, 3.090, 2.912, 2.808, 2.601, 2.402, 1.832, 1.674, 1.636, 1.551, 1.227, 1.099, 0.865, 0.858, 0.024, 0.019.

**<sup>13</sup>C NMR (100 MHz, CDCl<sub>3</sub>)**

Peak list (ppm): 168.224, 167.977, 161.500, 145.270, 144.985, 142.033, 141.998, 135.466, 135.423, 135.357, 129.360, 129.048, 129.016, 128.886, 128.832, 128.552, 128.394, 128.375, 127.488, 127.415, 125.788, 125.760, 123.206, 122.571, 122.477, 77.160, 76.842, 74.596, 74.377, 74.286, 74.188, 68.703, 64.369, 64.051, 52.654, 52.640, 42.296, 41.562, 41.290, 37.661, 32.606, 32.504, 31.782, 28.984, 18.183, -4.443.

Compounds **14n**

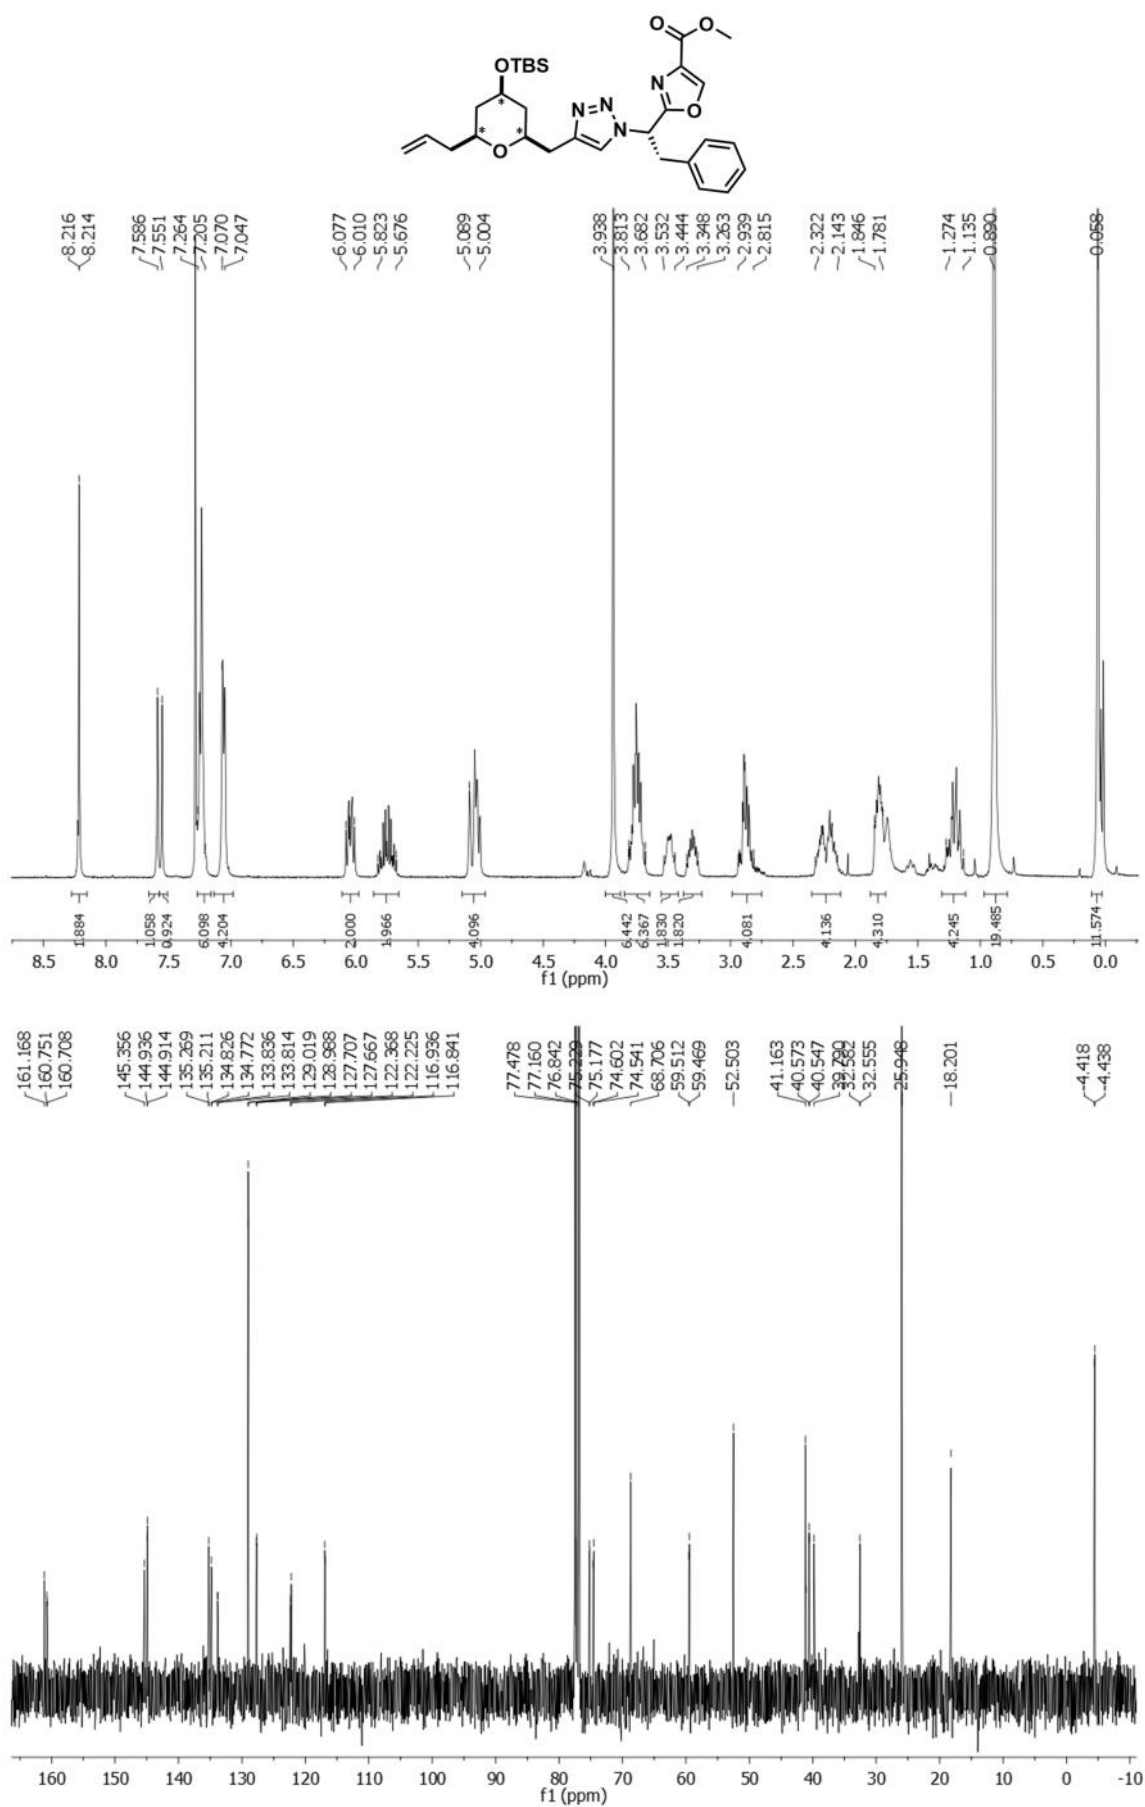

# Compounds **14o**

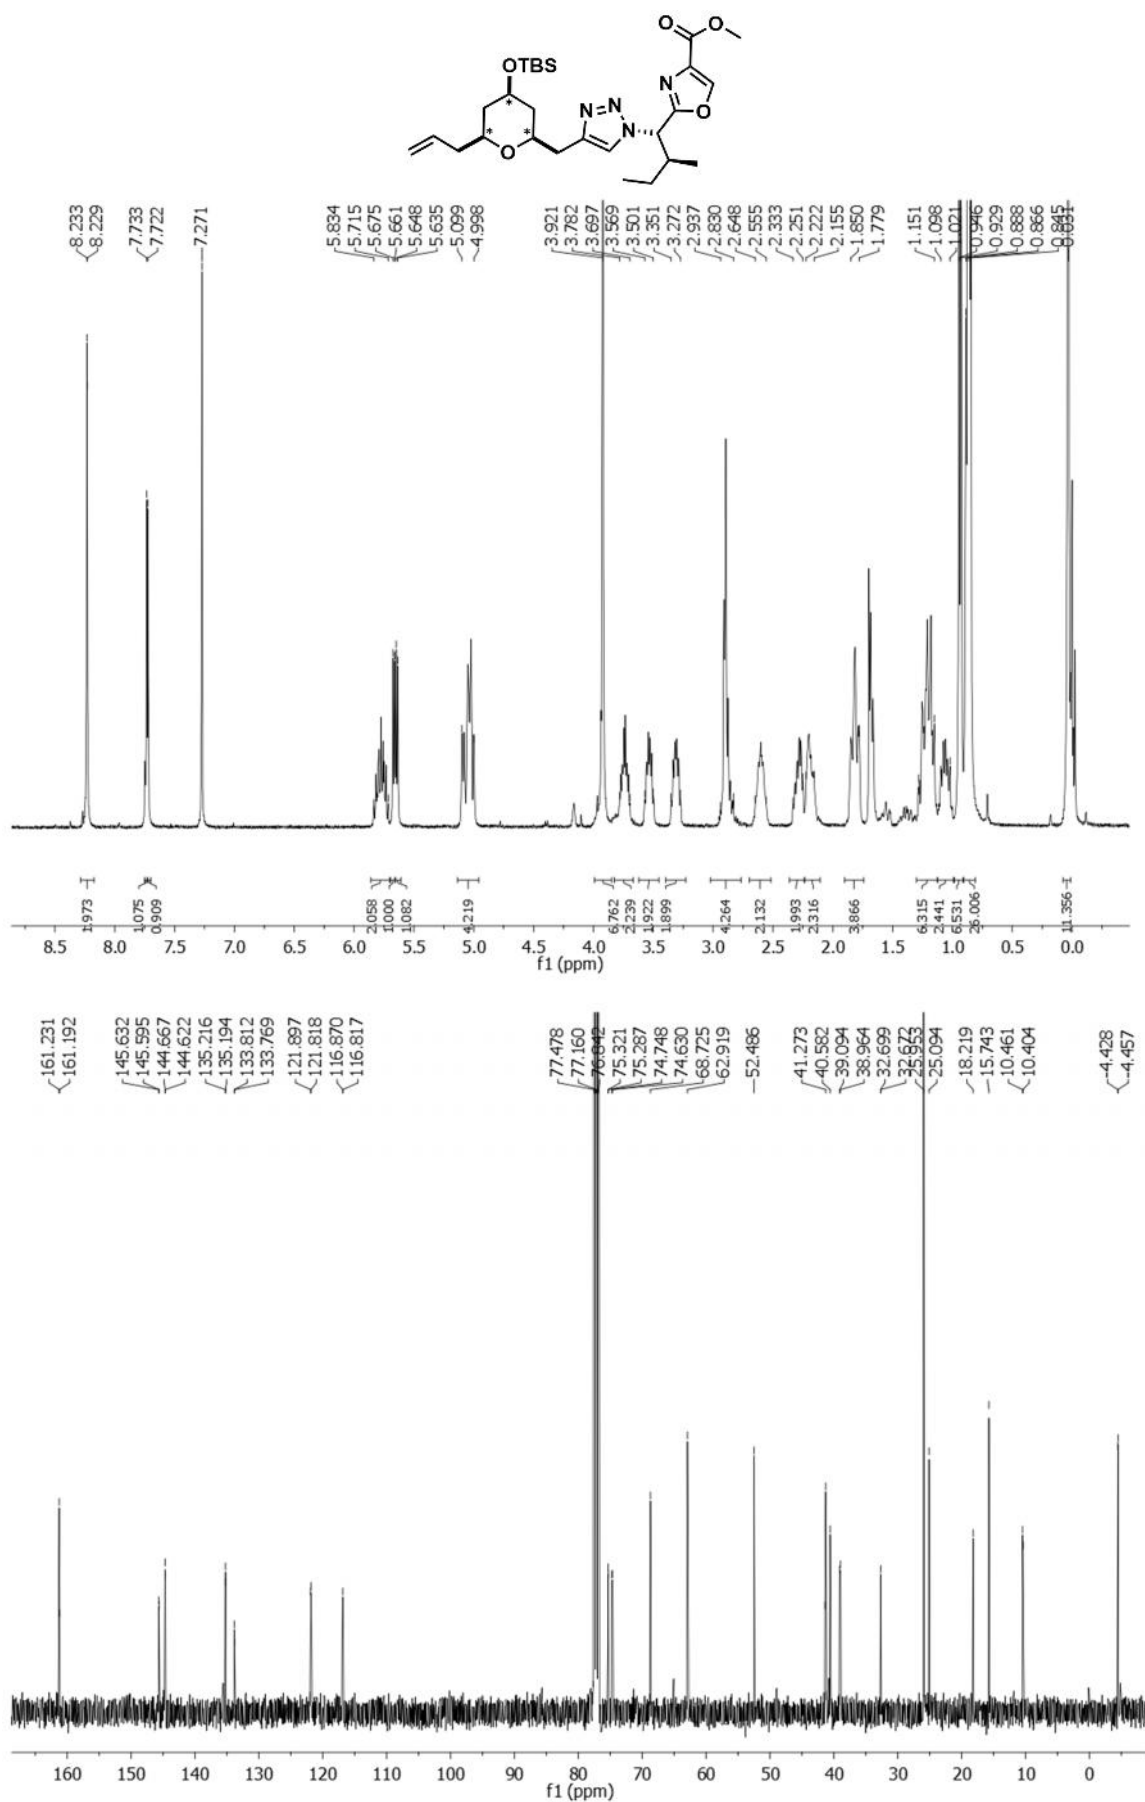

# Compounds **14p**

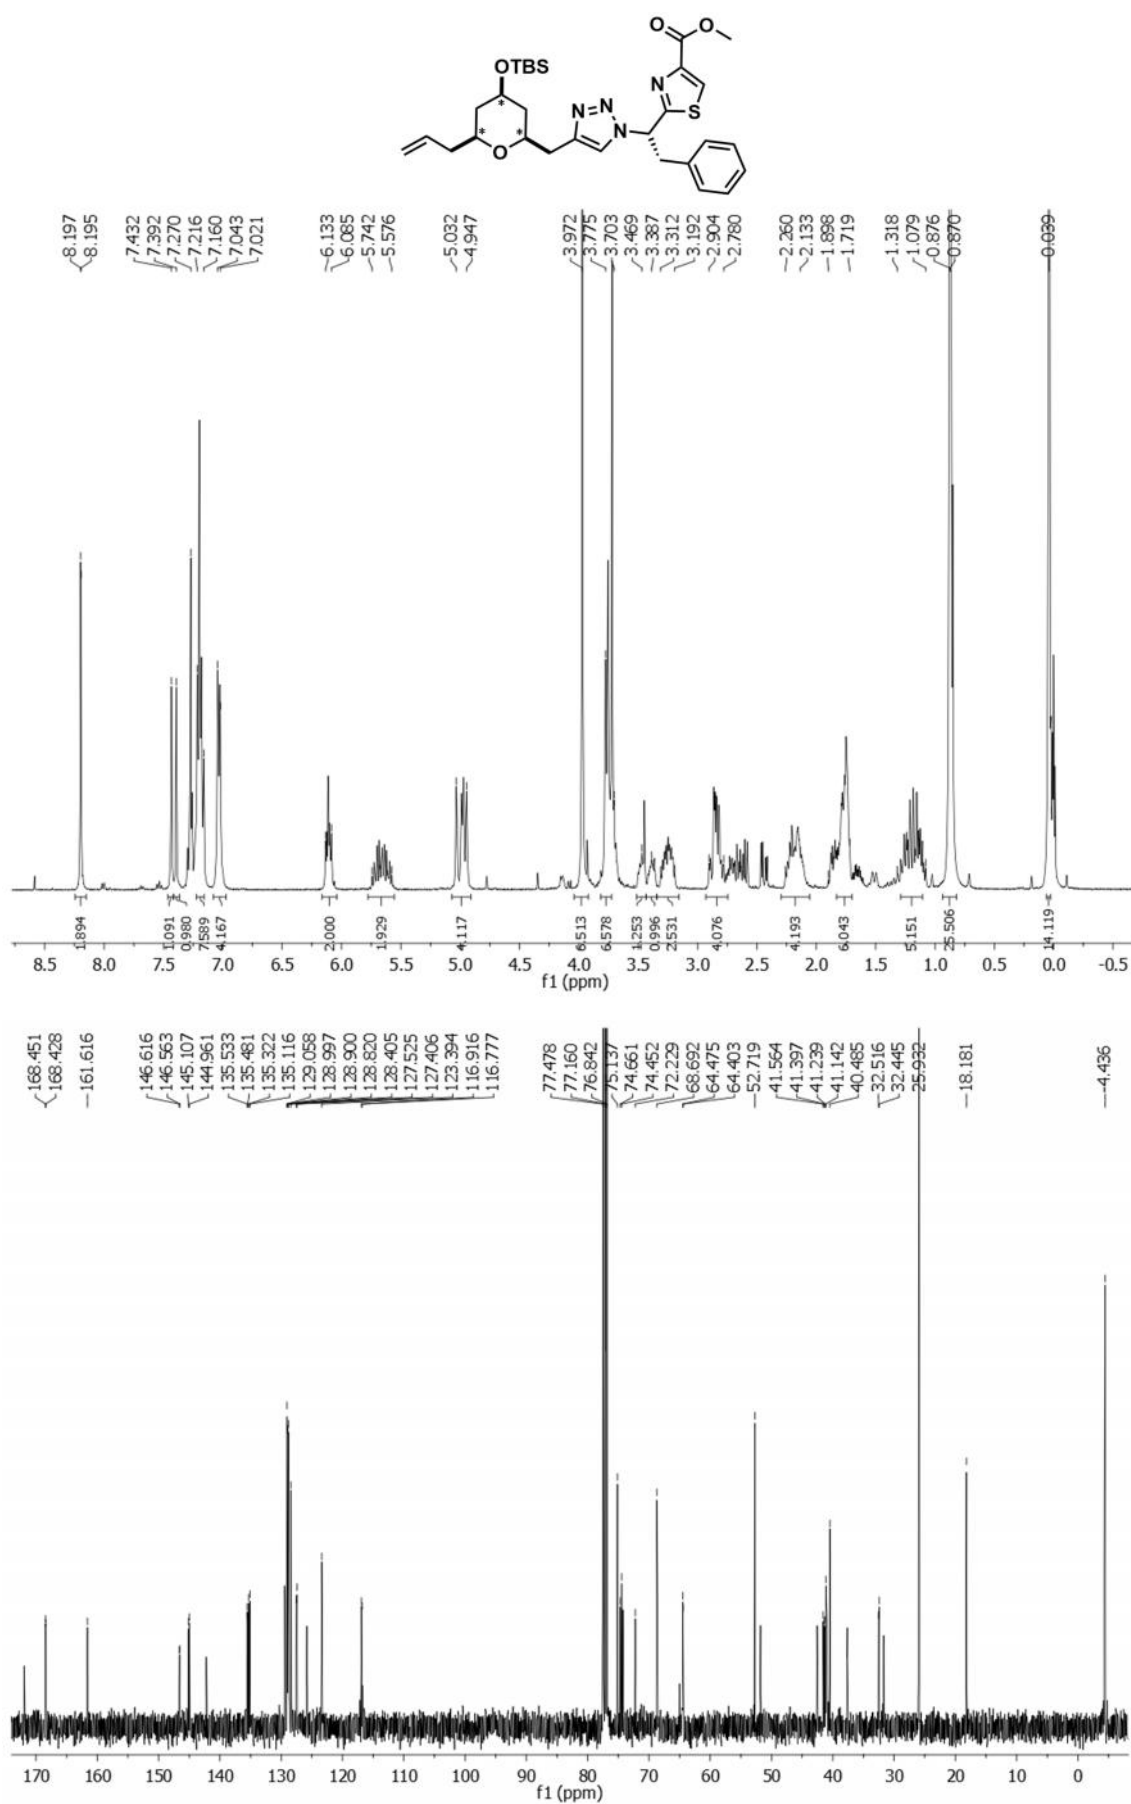

Compounds **16a**

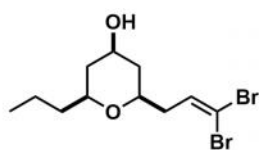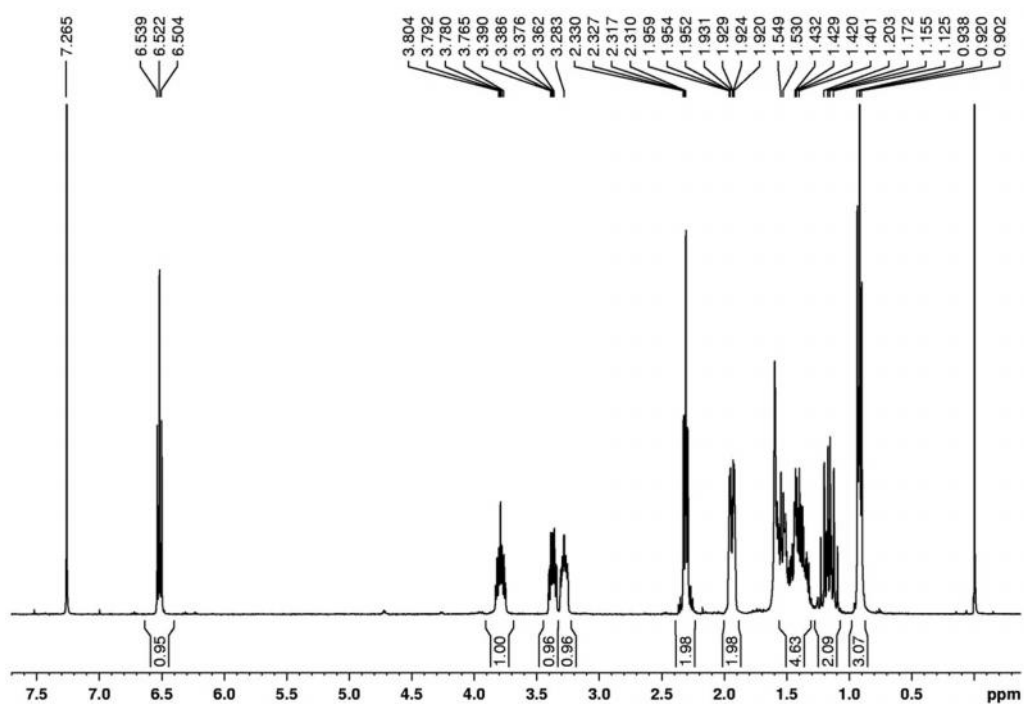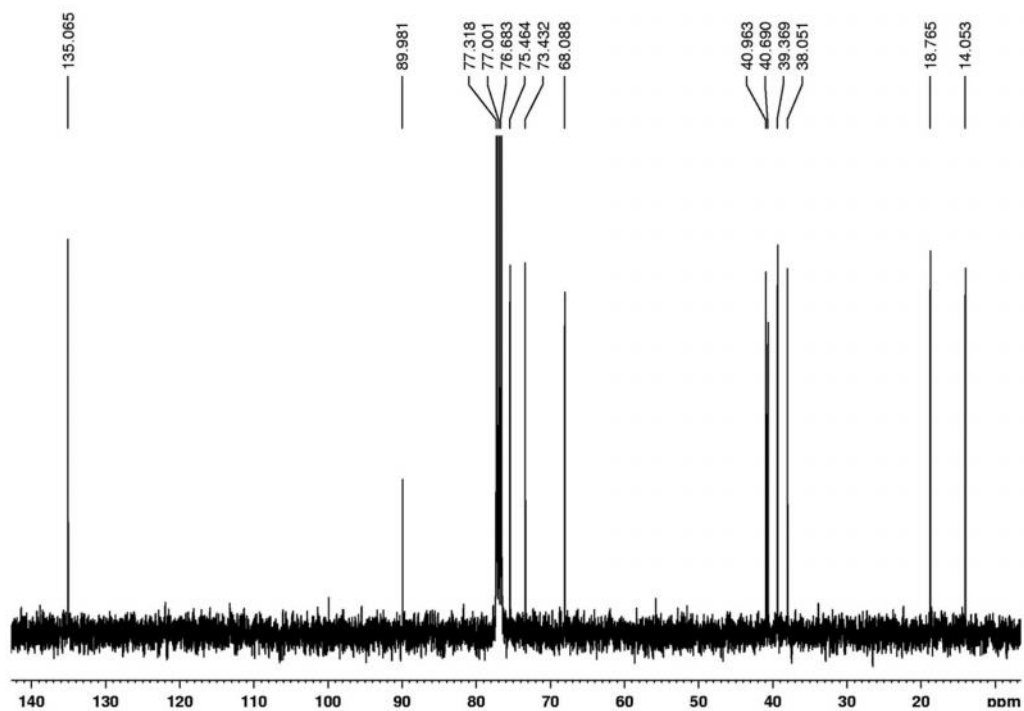

Compounds **16b**

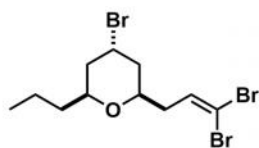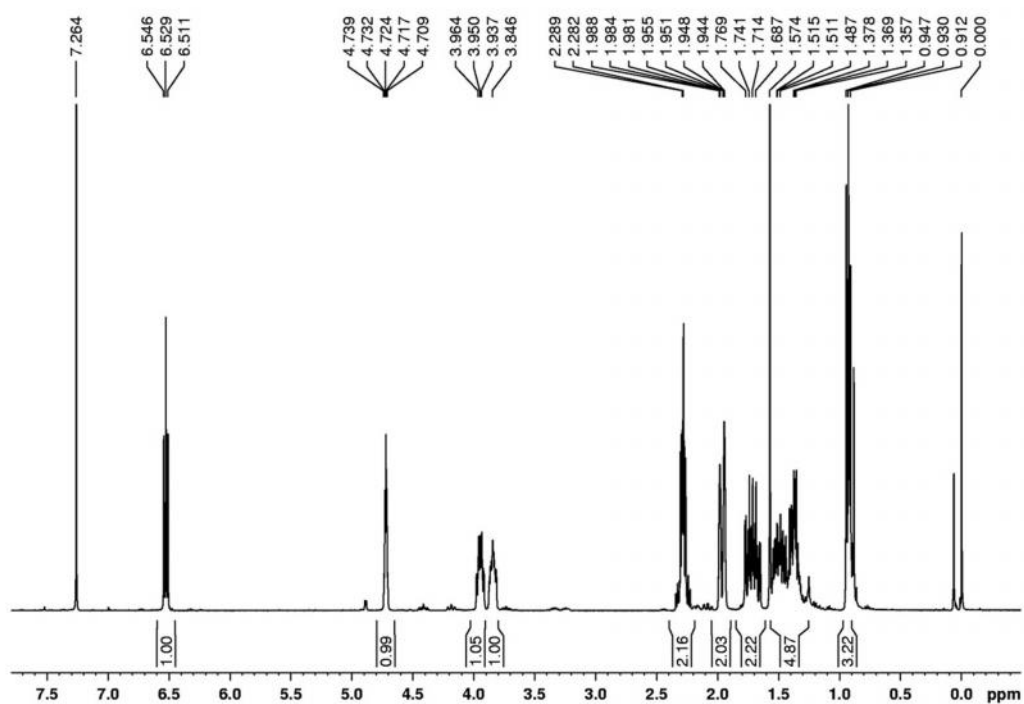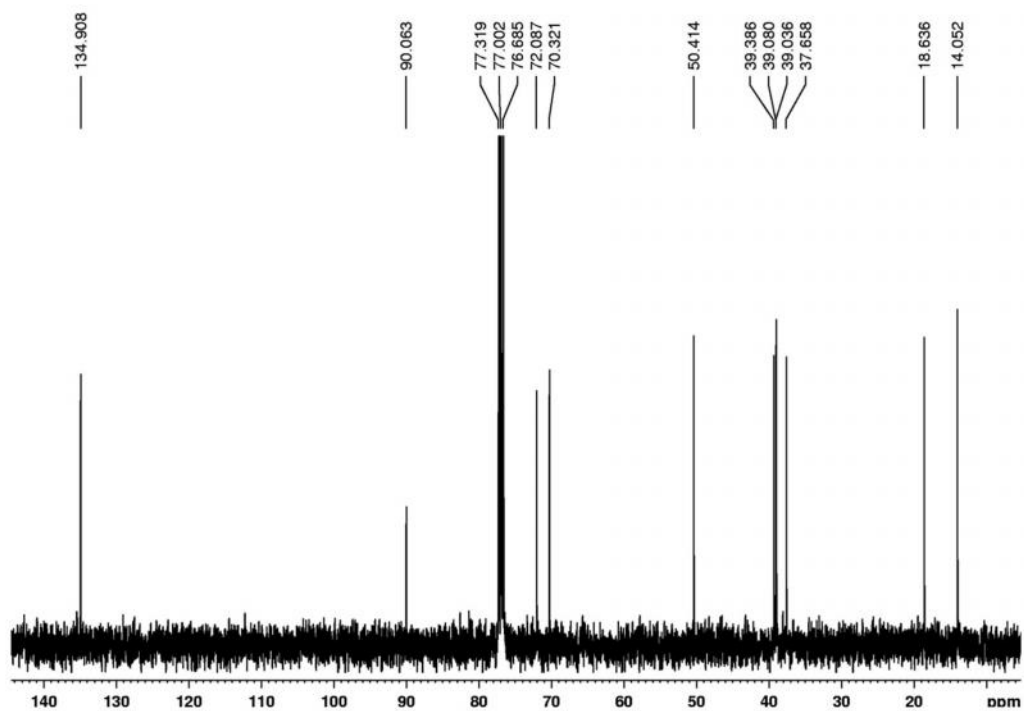



# Compounds 17

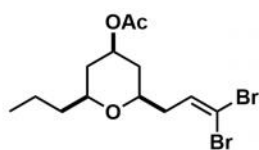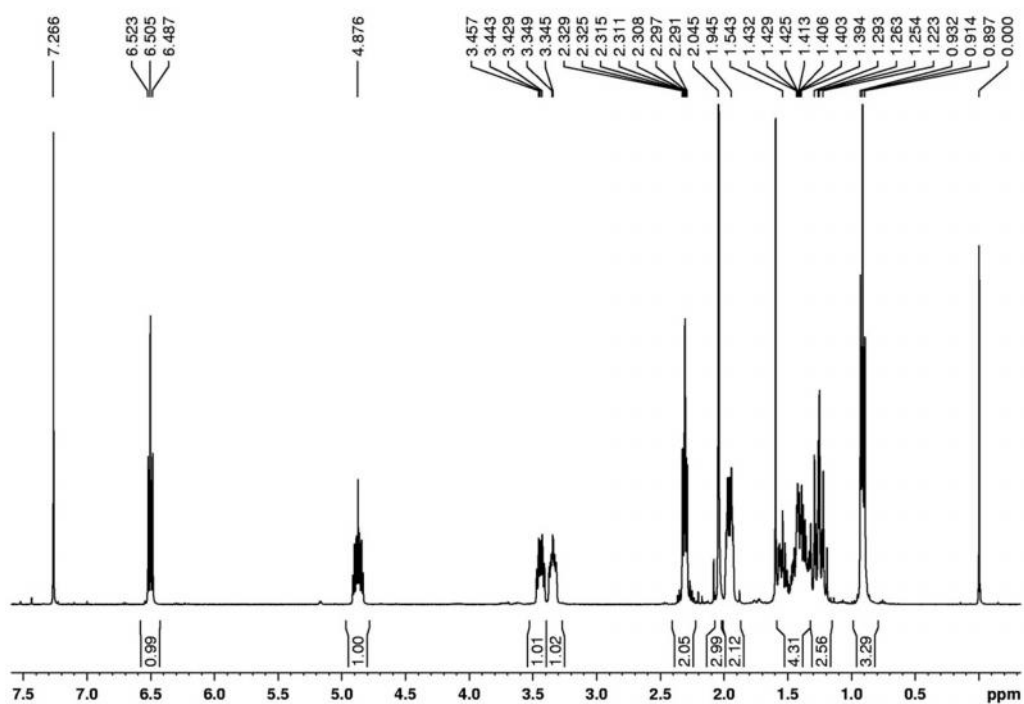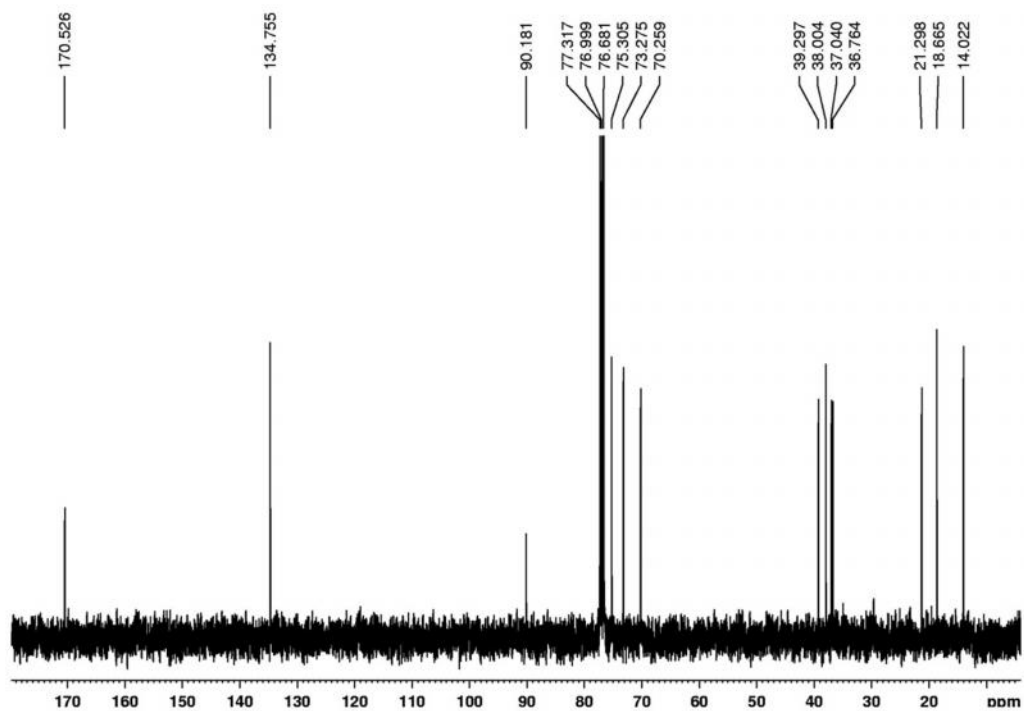

# Compounds 15

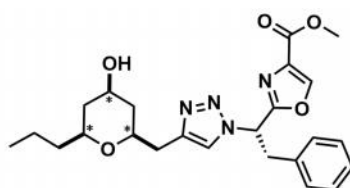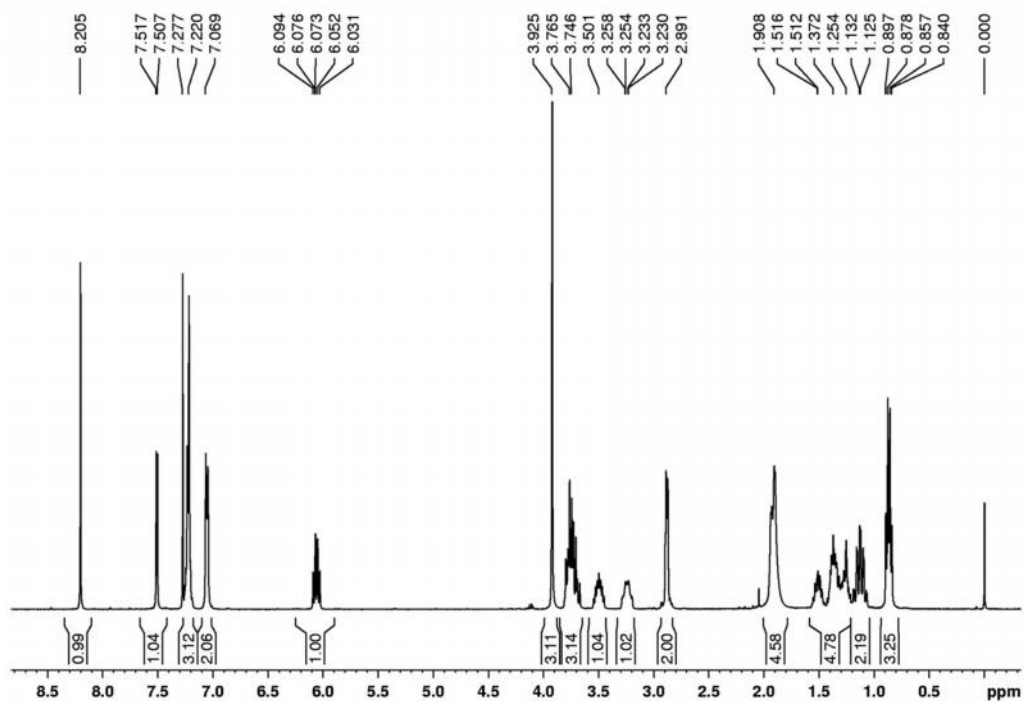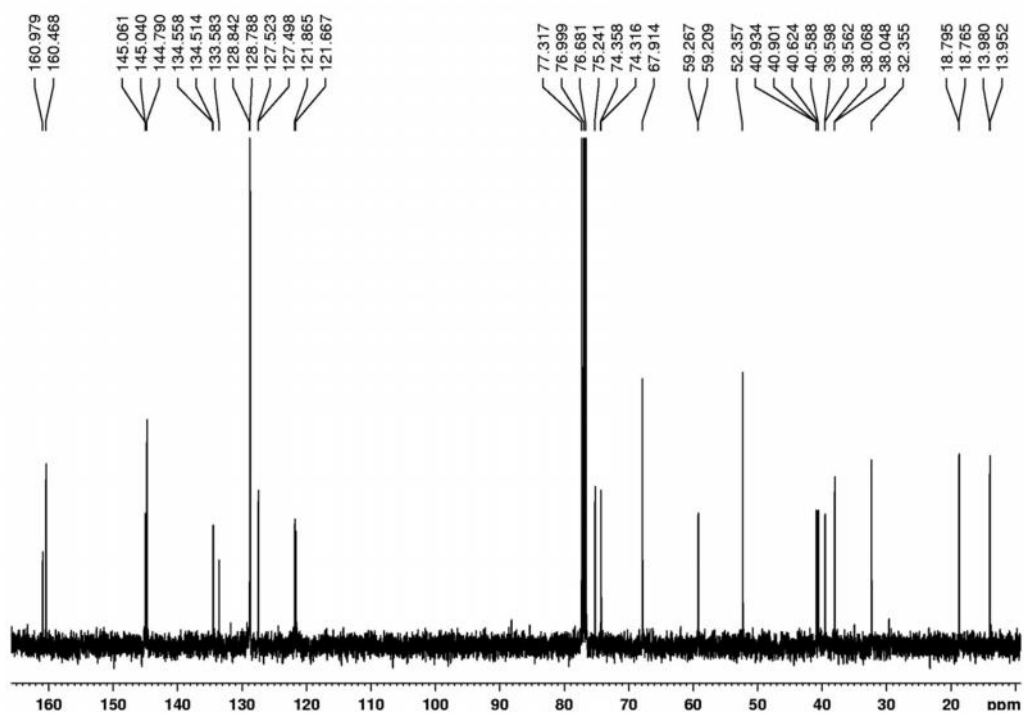

Supplement: c8nj02388c1.pdf [file c8nj02388c1.pdf]
